# Supplementary material for: Gut Microbiota and Psychiatric Disorders: A Two-Sample Mendelian Randomization Study
Source: Front Microbiol. 2022 Feb 4;12:737197. doi: 10.3389/fmicb.2021.737197 (PMC8856606; doi:10.3389/fmicb.2021.737197)
Supplement: Supplementary file 1 [file Data_Sheet_1.xlsx]

## Sheet: Supplemental Table 1
Supplemental Table 1. Definition of 15 psychiatric disorders/traits in the present MR study
Psychiatric disorder	Definition
Depression [1]	UK Biobank: The broadest phenotype (broad depression) was defined using self-reported help-seeking behaviour for mental health difficulties. Case and control status was determined by the touchscreen response to either of two questions: “Have you ever seen a general practitioner (GP) for nerves, anxiety, tension or depression?” (UK Biobank field: 2090) or “Have you ever seen a psychiatrist for ner…
	Psychiatric Genomics Consortium (PGC): All PGC samples passed a structured methodological review by major depressive disorder (MDD) assessment experts (DF Levinson and KS Kendler). Cases were required to meet international consensus criteria (Diagnostic and Statistical Manual of Mental Disorders-Version IV (DSM-IV) or International Classification of Diseases, 10th Revision (ICD-10)) for a lifetim…
Attention deficit/hyperactivity disorder (ADHD) [2]	Integrative Psychiatric Research (iPSYCH): Cases were diagnosed by psychiatrists at in- or out-patient clinics, predominantly the latter according to ICD10 (F90.0 diagnosis code), identified using the Danish Psychiatric Central Research Register2 (DPCRR). The DPCRR includes data on all people admitted to a psychiatric hospital for assessment, treatment, or both in Denmark since 1969 as well as pe…
	PGC: ADHD diagnosis follows the K-SADS (Schedule for Affective Disorders and Schizophrenia for School-Age Children; Epidemiologic Version) interview. Exclusion criteria were prematurity (<36 weeks), intellectual disability, major medical and neurological disorders, pervasive developmental disorder, psychoses and major mood disorders. Adult parents were assessed using the SADS-LA-IV (Lifetime vers…
Autism spectrum disorder (ASD) [3]	iPSYCH: Cases were identified from the Danish Psychiatric Central Research Register (DPCRR), which includes data on all individuals treated in Denmark at psychiatric hospitals (from 1969 onwards) as well as at outpatient psychiatric clinics (from 1995 onwards). Cases were diagnosed with ASD in 2013 or earlier by a psychiatrist according to ICD10, including diagnoses of childhood autism (ICD10 cod…
	PGC: Autism diagnoses were derived from a combination of assessment on the Autism Diagnostic Interview-Revised (ADI-R) and/or Autism Diagnostic Observation Schedule (ADOS) and clinician’s best judgment according to standard protocols at AGRE. We excluded individuals if they were assessed at less than 36 months old or if there was any evidence of the diagnostic criteria not being met from either t…
Bipolar disorder (BD) [4]	Cases were required to meet international consensus criteria (DSM-IV or ICD-10) for a lifetime diagnosis of BD established using structured diagnostic instruments from assessments by trained interviewers, clinician-administered checklists, or medical record review. In most cohorts, controls were screened for the absence of lifetime psychiatric disorders and randomly selected from the population.
Schizophrenia (SCZ) [5]	The SCZ diagnostic processes were similar between studies, and the final diagnosis is a best-estimate consensus lifetime diagnosis based on multiple sources of information such as clinical evaluation by research psychiatrists, different types of semi-structured interviews made by trained research nurses and research psychiatrists, medical records, course of the disease and data from multiple info…
Alcohol use disorder identification test (AUDIT) [6]	The AUDIT is a screening tool designed to identify hazardous alcohol use in the past year. The test consists of 10 items across 3 dimensions pertaining to alcohol consumption (items 1–3, often termed AUDIT-C), dependence symptoms (items 4–6), and harmful alcohol use (items 7–10) (collectively AUDIT-P). In order to determine the thresholds for dichotomizing AUDIT Total score that would most closel…
Cannabis use disorder (CUD) [7]	UKB: for all participants, self-report data were available on whether the participant had ever used cannabis during their lifetime: yes (1) versus no (0). An online follow-up questionnaire - asked: ‘Have you taken CANNABIS (marijuana, grass, hash, ganja, blow, draw, skunk, weed, spliff, dope), even if it was a long time ago?’.
	International Cannabis Consortium (ICC): for all individuals, the data were available on whether or not the subject reported having ever used cannabis during their lifetime: yes (1) versus no (0). Although phrasing of the question slightly differed between samples, our unit of analysis reflected lifetime cannabis use in all the samples.
Anorexia nervosa (AN) [8]	UKB: UK Biobank cases self-reported a diagnosis of AN.
	PGC, Anorexia Nervosa Genetics Initiative (ANGI), Genetic Consortium for Anorexia Nervosa (GCAN)/Wellcome Trust Case Control Consortium-3 (WTCCC3): case definitions established a lifetime diagnosis of AN via hospital or register records, structured clinical interviews, or on-line questionnaires based on standardized criteria (DSM-III-R, DSM-IV, ICD-8, ICD-9, or ICD-10). Controls were carefully ma…
Tourette syndrome (TS) [9]	Tourette (TR) diagnoses were assigned based on DSM-IV-TR criteria plus observation of tics by an experienced clinician. Eligible cases met DSM-5 criteria for a lifetime history of Tourette syndrome; other psychiatric diagnoses were not excluded. Exclusion criteria included a history of intellectual disability, and genetic or neurological disorders that caused tics or movement disorder phenocopies…
Obsessive-compulsive disorder (OCD) [10]	All cases met DSM-IV criteria for OCD. We omitted samples who used a self-report assessment tool that measured the presence of symptoms and not the diagnosis of OCD, as opposed to a clinical assessment that was based on OCD diagnostic criteria.
Extroversion [11]	Personality assessment including item data from the following personality inventories were included: the Neuroticism Extraversion Openness to Experience personality inventory revised (NEO-PI-R; 240 items, 48 items for Extraversion), the abbreviated NEO Five Factor Inventory (NEO-FFI; 60 items, 12 Extraversion items), the 30-item short version of the NEO-Five-Factor Model (NEO-FFI-30), the Eysenck…
Neuroticism [12]	UKB: Neuroticism was measured with 12 dichotomous (yes or no) items of the Eysenck Personality Questionnaire Revised Short Form (EPQ-RS)36, using a touchscreen-based questionnaire at the UKB assessment centers. Participants with valid responses to < 10 items were excluded from analyses. A weighted neuroticism sum-score was calculated by adding up individual valid item responses and dividing that …
	PGC: all participants of the GPC used sums of the scores on 12 items (five-point Likert scale: from ‘strongly disagree’ to ‘strongly agree’) of the NEO-FFI to measure neuroticism. If < 4 item scores were missing, data on invalid items were imputed by taking an individual’s average score on valid items. Participants were excluded from analyses if they had invalid scores on > 3 items.
Anxiety-related disorder (AD) [13]	Through the national research registers we identified individuals with an AD diagnosis assigned by a psychiatrist during routine clinical care according to the International Statistical Classification of Diseases and Related Health Problems, Tenth Revision (F40.0-F41.9; F43.0-F43.9). Individuals with comorbid autism were excluded. Although patients with autism experience anxiety, their anxiety is…
Stress-related disorder (SD) [13]	Through the national research registers we identified individuals with an SD diagnosis assigned by a psychiatrist during routine clinical care according to the International Statistical Classification of Diseases and Related Health Problems, Tenth Revision (F40.0-F41.9; F43.0-F43.9). Individuals with comorbid autism were excluded. Although patients with autism experience anxiety, their anxiety is…
Posttraumatic stress disorder (PTSD)	PTSD assessment was based either on lifetime (where possible) or current PTSD (i.e. including participants with a potential lifetime PTSD diagnosis as controls), and PTSD diagnosis was established using various instruments and different versions of the DSM (DSM-III-R, DSM-IV, DSM-5).
Suicide attempt (SA)	Individuals who at some point prior to December 31, 2012 had been recorded with one or more incidents of non-fatal SAs were considered as cases. SAs were identified by screening the Danish Psychiatric Central Research Register and the National Registry of Patients for diagnoses of suicide attempts (ICD-10: X60–X84). In addition, contacts where the “reasons for contact”-variable indicated SAs were…
Reference
[1] D.M. Howard, M.J. Adams, T.K. Clarke, et al., Genome-wide meta-analysis of depression identifies 102 independent variants and highlights the importance of the prefrontal brain regions, Nat Neurosci 22(3) (2019) 343-352.
[2] D. Demontis, R.K. Walters, J. Martin, et al., Discovery of the first genome-wide significant risk loci for attention deficit/hyperactivity disorder, Nat Genet 51(1) (2019) 63-75.
[3] J. Grove, S. Ripke, T.D. Als, et al., Identification of common genetic risk variants for autism spectrum disorder, Nat Genet 51(3) (2019) 431-444.
[4] E.A. Stahl, G. Breen, A.J. Forstner, et al., Genome-wide association study identifies 30 loci associated with bipolar disorder, Nat Genet 51(5) (2019) 793-803.
[5] C. Schizophrenia Working Group of the Psychiatric Genomics, Biological insights from 108 schizophrenia-associated genetic loci, Nature 511(7510) (2014) 421-7.
[6] S. Sanchez-Roige, A.A. Palmer, P. Fontanillas, et al., Genome-Wide Association Study Meta-Analysis of the Alcohol Use Disorders Identification Test (AUDIT) in Two Population-Based Cohorts, Am J Psychiatry 176(2) (2019) 107-118.
[7] J.A. Pasman, K.J.H. Verweij, Z. Gerring, et al., GWAS of lifetime cannabis use reveals new risk loci, genetic overlap with psychiatric traits, and a causal influence of schizophrenia, Nat Neurosci 21(9) (2018) 1161-1170.
[8] H.J. Watson, Z. Yilmaz, L.M. Thornton, et al., Genome-wide association study identifies eight risk loci and implicates metabo-psychiatric origins for anorexia nervosa, Nat Genet 51(8) (2019) 1207-1214.
[9] D. Yu, J.H. Sul, F. Tsetsos, et al., Interrogating the Genetic Determinants of Tourette's Syndrome and Other Tic Disorders Through Genome-Wide Association Studies, Am J Psychiatry 176(3) (2019) 217-227.
[10] C. International Obsessive Compulsive Disorder Foundation Genetics, O.C.D.C.G.A. Studies, Revealing the complex genetic architecture of obsessive-compulsive disorder using meta-analysis, Mol Psychiatry 23(5) (2018) 1181-1188.
[11] S.M. van den Berg, M.H. de Moor, K.J. Verweij, et al., Meta-analysis of Genome-Wide Association Studies for Extraversion: Findings from the Genetics of Personality Consortium, Behav Genet 46(2) (2016) 170-82.
[12] M. Nagel, P.R. Jansen, S. Stringer, et al., Meta-analysis of genome-wide association studies for neuroticism in 449,484 individuals identifies novel genetic loci and pathways, Nat Genet 50(7) (2018) 920-927.
[13] S.M. Meier, K. Trontti, K.L. Purves, et al., Genetic Variants Associated With Anxiety and Stress-Related Disorders: A Genome-Wide Association Study and Mouse-Model Study, JAMA Psychiatry 76(9) (2019) 924-932.
[14] C.M. Nievergelt, A.X. Maihofer, T. Klengel, et al., International meta-analysis of PTSD genome-wide association studies identifies sex- and ancestry-specific genetic risk loci, Nature communications 10(1) (2019) 4558.
[15] A. Erlangsen, V. Appadurai, Y. Wang, et al., Genetics of suicide attempts in individuals with and without mental disorders: a population-based genome-wide association study, Mol Psychiatry 25(10) (2020) 2410-2421.

## Sheet: Supplemental Table 2
Supplemental Table 2. GWAS summary data of bacterial taxa from theMiBioGen consortium at P-value<1.0×10-5
Feature	Taxa	SNP	A1	A0	Beta	SE	P-value	N
phylum	phylum.Actinobacteria.id.400	rs7570971	A	C	0.08494	0.01132	3.71e-14	17915
phylum	phylum.Actinobacteria.id.400	rs182549	C	T	0.08469	0.01145	9.03e-14	18123
phylum	phylum.Actinobacteria.id.400	rs6754311	C	T	0.08467	0.01143	9.17e-14	18121
phylum	phylum.Actinobacteria.id.400	rs4988235	G	A	0.08421	0.01143	1.15e-13	18123
phylum	phylum.Actinobacteria.id.400	rs1375131	C	T	0.08045	0.0113	7.09e-13	18121
phylum	phylum.Actinobacteria.id.400	rs6730157	G	A	0.08017	0.0113	7.58e-13	18123
phylum	phylum.Actinobacteria.id.400	rs36084664	G	A	-0.08222	0.01225	1.06e-12	16995
phylum	phylum.Actinobacteria.id.400	rs12465802	A	G	0.07967	0.01138	1.46e-12	18123
phylum	phylum.Actinobacteria.id.400	rs687670	C	T	0.08301	0.01166	2.32e-12	18123
phylum	phylum.Actinobacteria.id.400	rs13023281	C	T	-0.07917	0.01216	5.62e-12	16995
phylum	phylum.Actinobacteria.id.400	rs1446585	G	A	0.07956	0.01153	7.01e-12	17915
phylum	phylum.Actinobacteria.id.400	rs13404551	C	T	0.08144	0.01165	7.04e-12	18119
phylum	phylum.Actinobacteria.id.400	rs309160	T	C	0.08097	0.01166	9.03e-12	18123
phylum	phylum.Actinobacteria.id.400	rs218174	G	A	0.08016	0.01167	1.55e-11	18121
phylum	phylum.Actinobacteria.id.400	rs309168	T	C	0.07997	0.01166	1.67e-11	18123
phylum	phylum.Actinobacteria.id.400	rs632632	C	T	0.0799	0.01167	1.82e-11	18122
phylum	phylum.Actinobacteria.id.400	rs309180	G	A	0.07986	0.01168	1.83e-11	18123
phylum	phylum.Actinobacteria.id.400	rs309125	T	C	0.07883	0.01167	3.2e-11	18122
phylum	phylum.Actinobacteria.id.400	rs4988183	C	T	0.07989	0.01192	6.18e-11	18122
phylum	phylum.Actinobacteria.id.400	rs4954490	G	A	0.07721	0.01174	1.21e-10	18116
phylum	phylum.Actinobacteria.id.400	rs12615624	G	A	0.07821	0.01184	1.22e-10	18123
phylum	phylum.Actinobacteria.id.400	rs309134	A	G	0.07804	0.01184	1.3e-10	18122
phylum	phylum.Actinobacteria.id.400	rs2236783	G	A	0.077	0.01176	1.66e-10	18123
phylum	phylum.Actinobacteria.id.400	rs6759321	T	G	0.07402	0.01148	1.79e-10	17915
phylum	phylum.Actinobacteria.id.400	rs6716536	T	C	0.07339	0.0115	2.39e-10	17915
phylum	phylum.Actinobacteria.id.400	rs12620033	C	G	0.07625	0.01176	2.4e-10	18123
phylum	phylum.Actinobacteria.id.400	rs309164	C	T	0.0761	0.01184	3.75e-10	18123
phylum	phylum.Actinobacteria.id.400	rs1561277	A	C	0.07233	0.01146	4.38e-10	17915
phylum	phylum.Actinobacteria.id.400	rs3754686	T	C	0.07462	0.01174	4.84e-10	18123
phylum	phylum.Actinobacteria.id.400	rs12988076	C	A	0.07445	0.01174	5.53e-10	18123
phylum	phylum.Actinobacteria.id.400	rs309149	T	C	0.07516	0.01184	5.97e-10	18123
phylum	phylum.Actinobacteria.id.400	rs6742283	A	G	0.07433	0.01175	6.51e-10	18119
phylum	phylum.Actinobacteria.id.400	rs6719488	G	T	0.0739	0.01174	7.21e-10	18123
phylum	phylum.Actinobacteria.id.400	rs2322660	C	T	0.07388	0.01174	7.29e-10	18123
phylum	phylum.Actinobacteria.id.400	rs892715	T	C	0.07365	0.01174	8.23e-10	18123
phylum	phylum.Actinobacteria.id.400	rs748841	C	T	0.07367	0.01174	8.24e-10	18123
phylum	phylum.Actinobacteria.id.400	rs3769005	C	G	0.07333	0.01174	9.14e-10	18123
phylum	phylum.Actinobacteria.id.400	rs745500	G	A	0.07339	0.01174	9.78e-10	18123
phylum	phylum.Actinobacteria.id.400	rs12475139	A	T	0.07158	0.01163	1.01e-09	17915
phylum	phylum.Actinobacteria.id.400	rs11681248	C	T	0.06916	0.01124	1.08e-09	18115
phylum	phylum.Actinobacteria.id.400	rs2164210	T	C	0.07309	0.01174	1.1e-09	18123
phylum	phylum.Actinobacteria.id.400	rs3739020	G	T	0.07491	0.01201	1.29e-09	18118
phylum	phylum.Actinobacteria.id.400	rs2322659	T	C	0.07424	0.01199	1.71e-09	18123
phylum	phylum.Actinobacteria.id.400	rs1470457	G	A	0.07298	0.01201	3.21e-09	18123
phylum	phylum.Actinobacteria.id.400	rs309137	C	T	0.0696	0.01164	4.24e-09	18123
phylum	phylum.Actinobacteria.id.400	rs7587285	C	T	0.09343	0.01589	4.61e-09	18123
phylum	phylum.Actinobacteria.id.400	rs4954551	A	G	0.09287	0.01591	5.07e-09	18123
phylum	phylum.Actinobacteria.id.400	rs2278683	C	A	0.09335	0.0159	5.28e-09	18122
phylum	phylum.Actinobacteria.id.400	rs11693502	C	T	0.06648	0.01132	6.06e-09	18122
phylum	phylum.Actinobacteria.id.400	rs749873	C	T	0.0662	0.01125	6.37e-09	18123
phylum	phylum.Actinobacteria.id.400	rs11893318	C	T	0.09235	0.01591	7.82e-09	18122
phylum	phylum.Actinobacteria.id.400	rs71348714	G	A	0.06929	0.01191	1.13e-08	18123
phylum	phylum.Actinobacteria.id.400	rs313519	C	A	0.06904	0.01192	1.17e-08	18123
phylum	phylum.Actinobacteria.id.400	rs17261772	C	T	0.06867	0.01185	1.18e-08	17915
phylum	phylum.Actinobacteria.id.400	rs313526	T	C	0.06909	0.01191	1.24e-08	18123
phylum	phylum.Actinobacteria.id.400	rs313528	A	G	0.06906	0.01191	1.25e-08	18123
phylum	phylum.Actinobacteria.id.400	rs313518	T	C	0.06907	0.01191	1.26e-08	18123
phylum	phylum.Actinobacteria.id.400	rs1446584	G	A	0.06861	0.01191	1.48e-08	18123
phylum	phylum.Actinobacteria.id.400	rs7355359	C	T	0.06859	0.01191	1.61e-08	18123
phylum	phylum.Actinobacteria.id.400	rs11684545	G	T	0.06879	0.01196	1.64e-08	18123
phylum	phylum.Actinobacteria.id.400	rs4954280	G	A	0.06838	0.01191	1.66e-08	18123
phylum	phylum.Actinobacteria.id.400	rs313517	G	A	0.06838	0.01191	1.72e-08	18123
phylum	phylum.Actinobacteria.id.400	rs313524	T	C	0.06834	0.01191	1.74e-08	18123
phylum	phylum.Actinobacteria.id.400	rs6720287	G	A	0.0682	0.01191	1.79e-08	18123
phylum	phylum.Actinobacteria.id.400	rs1011361	G	A	0.06865	0.01196	1.79e-08	18122
phylum	phylum.Actinobacteria.id.400	rs2034276	T	A	0.0682	0.01191	1.81e-08	18123
phylum	phylum.Actinobacteria.id.400	rs6430589	G	C	0.06837	0.01196	1.86e-08	18122
phylum	phylum.Actinobacteria.id.400	rs10928546	C	T	0.06829	0.01196	2e-08	18123
phylum	phylum.Actinobacteria.id.400	rs313523	A	G	0.06792	0.01192	2.03e-08	18123
phylum	phylum.Actinobacteria.id.400	rs6715856	C	T	0.06787	0.01191	2.06e-08	18123
phylum	phylum.Actinobacteria.id.400	rs656326	C	A	0.06769	0.01191	2.28e-08	18123
phylum	phylum.Actinobacteria.id.400	rs313522	A	T	0.06766	0.01192	2.34e-08	18123
phylum	phylum.Actinobacteria.id.400	rs71348715	G	T	0.0681	0.01196	2.4e-08	18123
phylum	phylum.Actinobacteria.id.400	rs6755383	T	C	0.06747	0.01191	2.52e-08	18123
phylum	phylum.Actinobacteria.id.400	rs13412397	G	A	0.0679	0.01193	2.56e-08	18123
phylum	phylum.Actinobacteria.id.400	rs62160860	C	G	0.09053	0.01612	2.61e-08	18118
phylum	phylum.Actinobacteria.id.400	rs2082729	C	T	0.06781	0.01196	2.78e-08	18123
phylum	phylum.Actinobacteria.id.400	rs6723108	T	G	0.05819	0.01099	2.84e-08	18123
phylum	phylum.Actinobacteria.id.400	rs7608045	C	T	0.06713	0.01191	2.99e-08	18123
phylum	phylum.Actinobacteria.id.400	rs11679508	A	T	0.06752	0.01193	3.07e-08	18123
phylum	phylum.Actinobacteria.id.400	rs1438305	C	G	0.06754	0.01196	3.13e-08	18123
phylum	phylum.Actinobacteria.id.400	rs12998016	C	T	0.06748	0.01197	3.13e-08	18122
phylum	phylum.Actinobacteria.id.400	rs10928542	A	G	0.06699	0.01191	3.16e-08	18123
phylum	phylum.Actinobacteria.id.400	rs4954276	G	A	0.06714	0.01191	3.28e-08	18123
phylum	phylum.Actinobacteria.id.400	rs10202489	G	A	0.0674	0.01194	3.29e-08	18123
phylum	phylum.Actinobacteria.id.400	rs1438304	A	G	0.06742	0.01196	3.33e-08	18123
phylum	phylum.Actinobacteria.id.400	rs28453840	G	A	0.06704	0.01195	3.74e-08	18122
phylum	phylum.Actinobacteria.id.400	rs4954279	A	G	0.06661	0.01191	3.75e-08	18123
phylum	phylum.Actinobacteria.id.400	rs12619365	T	C	0.06678	0.01195	3.87e-08	18123
phylum	phylum.Actinobacteria.id.400	rs13413639	A	C	0.0666	0.01191	3.96e-08	18123
phylum	phylum.Actinobacteria.id.400	rs12998387	A	G	0.06703	0.01195	4e-08	18123
phylum	phylum.Actinobacteria.id.400	rs3213889	A	G	0.06703	0.01196	4.12e-08	18123
phylum	phylum.Actinobacteria.id.400	rs10192827	G	A	0.06681	0.01196	4.32e-08	18120
phylum	phylum.Actinobacteria.id.400	rs10195620	A	T	0.06675	0.01197	4.45e-08	18123
phylum	phylum.Actinobacteria.id.400	rs10173394	C	T	0.06667	0.01195	4.67e-08	18123
phylum	phylum.Actinobacteria.id.400	rs1438307	G	T	0.06663	0.01196	4.68e-08	18123
phylum	phylum.Actinobacteria.id.400	rs2680880	A	T	0.06067	0.01092	5.46e-08	18123
phylum	phylum.Actinobacteria.id.400	rs932206	C	T	0.05942	0.01094	6.12e-08	17915
phylum	phylum.Actinobacteria.id.400	rs12994270	T	A	0.06611	0.01195	6.28e-08	18123
phylum	phylum.Actinobacteria.id.400	rs1869829	G	A	0.06435	0.01182	6.87e-08	18123
phylum	phylum.Actinobacteria.id.400	rs12469709	C	T	0.06588	0.01197	6.98e-08	18123
phylum	phylum.Actinobacteria.id.400	rs1374329	G	A	0.06618	0.01215	1.09e-07	18123
phylum	phylum.Actinobacteria.id.400	rs3768998	T	G	0.08732	0.01644	1.1e-07	18122
phylum	phylum.Actinobacteria.id.400	rs2011946	C	A	0.06092	0.01133	1.11e-07	18116
phylum	phylum.Actinobacteria.id.400	rs2304599	C	G	0.06683	0.01233	1.26e-07	18123
phylum	phylum.Actinobacteria.id.400	rs10188066	G	A	0.06602	0.01232	1.71e-07	18123
phylum	phylum.Actinobacteria.id.400	rs9287442	A	G	0.06621	0.01228	1.71e-07	18123
phylum	phylum.Actinobacteria.id.400	rs2278544	A	G	0.06608	0.01229	1.84e-07	18123
phylum	phylum.Actinobacteria.id.400	rs10928545	A	G	0.06608	0.01228	1.95e-07	18123
phylum	phylum.Actinobacteria.id.400	rs6760329	A	G	0.0657	0.01232	1.97e-07	18123
phylum	phylum.Actinobacteria.id.400	rs10928554	T	C	0.08953	0.01658	2.26e-07	17915
phylum	phylum.Actinobacteria.id.400	rs12616520	A	T	0.06546	0.01228	2.38e-07	18123
phylum	phylum.Actinobacteria.id.400	rs1879087	C	T	0.10168	0.02165	2.48e-07	11920
phylum	phylum.Actinobacteria.id.400	rs4954513	A	G	0.08622	0.01648	2.54e-07	18123
phylum	phylum.Actinobacteria.id.400	rs10187402	G	C	0.06118	0.01186	2.62e-07	18115
phylum	phylum.Actinobacteria.id.400	rs1030764	C	T	0.06524	0.01233	2.63e-07	18123
phylum	phylum.Actinobacteria.id.400	rs935613	T	C	0.06135	0.01186	2.68e-07	18123
phylum	phylum.Actinobacteria.id.400	rs4429415	C	T	0.05737	0.01109	2.74e-07	18123
phylum	phylum.Actinobacteria.id.400	rs16832275	G	C	0.08293	0.01589	2.96e-07	18123
phylum	phylum.Actinobacteria.id.400	rs2164332	C	G	0.08225	0.01588	3.4e-07	18123
phylum	phylum.Actinobacteria.id.400	rs3769002	C	T	0.08455	0.01649	3.83e-07	18123
phylum	phylum.Actinobacteria.id.400	rs4954556	A	G	0.11306	0.02355	3.83e-07	10790
phylum	phylum.Actinobacteria.id.400	rs56263017	C	T	0.08453	0.01649	3.83e-07	18123
phylum	phylum.Actinobacteria.id.400	rs10841473	G	C	-0.05977	0.01171	3.85e-07	18120
phylum	phylum.Actinobacteria.id.400	rs16832156	A	G	0.08237	0.01591	4.36e-07	18122
phylum	phylum.Actinobacteria.id.400	rs6752519	T	C	0.08421	0.01646	4.44e-07	18123
phylum	phylum.Actinobacteria.id.400	rs309126	C	T	0.07976	0.01547	4.5e-07	18123
phylum	phylum.Actinobacteria.id.400	rs2322725	C	T	0.08129	0.01589	4.53e-07	18123
phylum	phylum.Actinobacteria.id.400	rs16832200	C	T	0.08148	0.01589	4.56e-07	18123
phylum	phylum.Actinobacteria.id.400	rs3820794	C	T	0.06368	0.01231	5e-07	18123
phylum	phylum.Actinobacteria.id.400	rs4561607	T	C	0.05613	0.01115	5.65e-07	18122
phylum	phylum.Actinobacteria.id.400	rs10193348	G	A	0.07216	0.01494	5.73e-07	18123
phylum	phylum.Actinobacteria.id.400	rs1530559	G	A	0.05358	0.01086	5.91e-07	17915
phylum	phylum.Actinobacteria.id.400	rs6714750	G	A	0.06097	0.01198	5.97e-07	17915
phylum	phylum.Actinobacteria.id.400	rs1375132	G	A	0.05969	0.01184	6.01e-07	18120
phylum	phylum.Actinobacteria.id.400	rs309132	G	C	0.08357	0.01627	6.01e-07	18123
phylum	phylum.Actinobacteria.id.400	rs3213871	T	C	0.08315	0.01653	6.06e-07	18123
phylum	phylum.Actinobacteria.id.400	rs7608980	A	G	0.08407	0.0165	6.2e-07	18123
phylum	phylum.Actinobacteria.id.400	rs12478902	C	T	0.08142	0.0161	6.42e-07	18121
phylum	phylum.Actinobacteria.id.400	rs11679933	G	T	0.05717	0.01133	6.46e-07	18116
phylum	phylum.Actinobacteria.id.400	rs7568525	A	G	0.07133	0.01498	6.54e-07	18123
phylum	phylum.Actinobacteria.id.400	rs12328663	C	T	0.07169	0.01494	6.62e-07	18123
phylum	phylum.Actinobacteria.id.400	rs16832138	A	G	0.08372	0.0165	6.79e-07	18123
phylum	phylum.Actinobacteria.id.400	rs10208624	T	C	0.07118	0.01498	6.98e-07	18123
phylum	phylum.Actinobacteria.id.400	rs6747073	C	T	0.05929	0.01183	7.06e-07	18120
phylum	phylum.Actinobacteria.id.400	rs6430593	A	G	0.0809	0.01589	7.15e-07	18123
phylum	phylum.Actinobacteria.id.400	rs2874739	T	C	0.07165	0.01494	7.24e-07	18123
phylum	phylum.Actinobacteria.id.400	rs10928513	T	C	0.05241	0.01095	7.39e-07	18122
phylum	phylum.Actinobacteria.id.400	rs3754690	T	C	0.08538	0.01705	7.41e-07	18123
phylum	phylum.Actinobacteria.id.400	rs56067372	T	C	0.0834	0.0165	7.42e-07	18123
phylum	phylum.Actinobacteria.id.400	rs56903548	T	C	0.07153	0.01494	7.72e-07	18123
phylum	phylum.Actinobacteria.id.400	rs7422031	T	C	0.07151	0.01494	7.94e-07	18123
phylum	phylum.Actinobacteria.id.400	rs4450544	T	C	0.05509	0.01108	8.03e-07	18123
phylum	phylum.Actinobacteria.id.400	rs1979033	A	G	0.05113	0.01085	8.53e-07	18116
phylum	phylum.Actinobacteria.id.400	rs13389481	A	C	0.07234	0.0153	8.74e-07	18120
phylum	phylum.Actinobacteria.id.400	rs7581382	C	T	-0.0608	0.01346	8.82e-07	16995
phylum	phylum.Actinobacteria.id.400	rs11898045	C	T	0.07064	0.01495	8.91e-07	18123
phylum	phylum.Actinobacteria.id.400	rs61087958	T	C	0.07094	0.01496	9.06e-07	18123
phylum	phylum.Actinobacteria.id.400	rs4954220	A	C	0.07062	0.01498	9.41e-07	18123
phylum	phylum.Actinobacteria.id.400	rs7573600	C	G	0.07062	0.01495	9.5e-07	18123
phylum	phylum.Actinobacteria.id.400	rs6430561	T	C	0.0707	0.01498	9.51e-07	18123
phylum	phylum.Actinobacteria.id.400	rs4349285	G	T	0.05476	0.01109	9.83e-07	18123
phylum	phylum.Actinobacteria.id.400	rs58327215	C	G	0.07046	0.01498	9.96e-07	18123
phylum	phylum.Actinobacteria.id.400	rs58426504	G	T	0.0703	0.01495	1.01e-06	18123
phylum	phylum.Actinobacteria.id.400	rs12989104	T	G	0.05444	0.01113	1.11e-06	18116
phylum	phylum.Actinobacteria.id.400	rs12105842	C	T	0.05448	0.01111	1.17e-06	18123
phylum	phylum.Actinobacteria.id.400	rs2290518	A	G	0.07012	0.01495	1.19e-06	18123
phylum	phylum.Actinobacteria.id.400	rs74037001	G	A	-0.07965	0.01647	1.21e-06	17312
phylum	phylum.Actinobacteria.id.400	rs1842796	A	G	0.05411	0.01109	1.24e-06	18123
phylum	phylum.Actinobacteria.id.400	rs2016636	A	G	0.05806	0.01186	1.26e-06	18123
phylum	phylum.Actinobacteria.id.400	rs6741481	G	A	0.0698	0.01495	1.33e-06	18123
phylum	phylum.Actinobacteria.id.400	rs58697996	A	G	0.0696	0.01499	1.33e-06	18123
phylum	phylum.Actinobacteria.id.400	rs55634455	C	T	0.08294	0.01704	1.36e-06	18123
phylum	phylum.Actinobacteria.id.400	rs4530308	C	T	0.05397	0.01109	1.38e-06	18123
phylum	phylum.Actinobacteria.id.400	rs78141345	A	G	0.08295	0.01704	1.39e-06	18123
phylum	phylum.Actinobacteria.id.400	rs74266324	A	G	0.06483	0.01371	1.44e-06	17915
phylum	phylum.Actinobacteria.id.400	rs2164331	T	C	0.08079	0.01651	1.45e-06	18123
phylum	phylum.Actinobacteria.id.400	rs12465650	G	T	0.05373	0.01108	1.47e-06	18123
phylum	phylum.Actinobacteria.id.400	rs55888705	A	G	0.05299	0.01096	1.47e-06	18121
phylum	phylum.Actinobacteria.id.400	rs4954214	T	C	0.06976	0.015	1.5e-06	18123
phylum	phylum.Actinobacteria.id.400	rs10209482	C	A	0.06965	0.01516	1.5e-06	18123
phylum	phylum.Actinobacteria.id.400	rs998451	G	A	0.05007	0.011	1.53e-06	18122
phylum	phylum.Actinobacteria.id.400	rs16855656	G	A	0.07652	0.01557	1.55e-06	18123
phylum	phylum.Actinobacteria.id.400	rs62168941	T	C	0.0697	0.01499	1.57e-06	18123
phylum	phylum.Actinobacteria.id.400	rs3754692	C	T	0.05962	0.01207	1.58e-06	18123
phylum	phylum.Actinobacteria.id.400	rs62168942	C	T	0.06959	0.01499	1.62e-06	18123
phylum	phylum.Actinobacteria.id.400	rs3769011	T	A	0.08162	0.01711	1.64e-06	18123
phylum	phylum.Actinobacteria.id.400	rs62160866	G	A	0.10952	0.02417	1.64e-06	10790
phylum	phylum.Actinobacteria.id.400	rs13427494	A	G	0.06934	0.01517	1.66e-06	18123
phylum	phylum.Actinobacteria.id.400	rs10167901	T	C	0.06939	0.015	1.67e-06	18123
phylum	phylum.Actinobacteria.id.400	rs4953947	C	A	0.06929	0.015	1.68e-06	18123
phylum	phylum.Actinobacteria.id.400	rs1900741	T	C	0.0637	0.0129	1.69e-06	18123
phylum	phylum.Actinobacteria.id.400	rs4953948	G	T	0.06921	0.015	1.74e-06	18123
phylum	phylum.Actinobacteria.id.400	rs921859	G	A	0.0693	0.01499	1.74e-06	18123
phylum	phylum.Actinobacteria.id.400	rs10167809	T	C	0.06922	0.015	1.75e-06	18123
phylum	phylum.Actinobacteria.id.400	rs10167884	T	C	0.06922	0.015	1.75e-06	18123
phylum	phylum.Actinobacteria.id.400	rs13410870	A	G	0.06892	0.01495	1.78e-06	18123
phylum	phylum.Actinobacteria.id.400	rs2017831	T	C	0.06929	0.01499	1.78e-06	18123
phylum	phylum.Actinobacteria.id.400	rs6738563	T	G	0.04976	0.01085	1.81e-06	18117
phylum	phylum.Actinobacteria.id.400	rs4954216	A	G	0.06908	0.015	1.83e-06	18123
phylum	phylum.Actinobacteria.id.400	rs62448869	T	A	-0.05121	0.01078	1.83e-06	17915
phylum	phylum.Actinobacteria.id.400	rs7601696	A	C	0.06921	0.01499	1.87e-06	18123
phylum	phylum.Actinobacteria.id.400	rs4954445	A	T	0.0812	0.01711	1.88e-06	18123
phylum	phylum.Actinobacteria.id.400	rs7577258	A	G	0.06916	0.01499	1.89e-06	18123
phylum	phylum.Actinobacteria.id.400	rs4953946	G	T	0.06899	0.015	1.89e-06	18123
phylum	phylum.Actinobacteria.id.400	rs4954217	T	C	0.06915	0.01499	1.9e-06	18123
phylum	phylum.Actinobacteria.id.400	rs10460330	G	A	0.05346	0.0111	1.92e-06	18123
phylum	phylum.Actinobacteria.id.400	rs6729961	G	T	0.09167	0.01958	1.93e-06	15214
phylum	phylum.Actinobacteria.id.400	rs7565268	C	T	0.06903	0.01499	1.98e-06	18123
phylum	phylum.Actinobacteria.id.400	rs10182750	C	T	0.06891	0.015	1.99e-06	18123
phylum	phylum.Actinobacteria.id.400	rs4954215	A	G	0.06896	0.015	2e-06	18123
phylum	phylum.Actinobacteria.id.400	rs13409400	C	A	0.06894	0.01499	2e-06	18123
phylum	phylum.Actinobacteria.id.400	rs10186594	G	A	0.06893	0.01499	2.01e-06	18123
phylum	phylum.Actinobacteria.id.400	rs12465088	A	G	0.05341	0.01115	2.14e-06	18122
phylum	phylum.Actinobacteria.id.400	rs7603805	G	A	0.06858	0.01494	2.14e-06	18123
phylum	phylum.Actinobacteria.id.400	rs1942055	C	G	0.04996	0.01099	2.15e-06	18116
phylum	phylum.Actinobacteria.id.400	rs7565149	A	T	0.06876	0.01499	2.15e-06	18123
phylum	phylum.Actinobacteria.id.400	rs62448871	C	A	-0.05052	0.01072	2.15e-06	18113
phylum	phylum.Actinobacteria.id.400	rs7601683	T	C	0.06876	0.01499	2.17e-06	18123
phylum	phylum.Actinobacteria.id.400	rs4954221	A	G	0.06803	0.01498	2.18e-06	18123
phylum	phylum.Actinobacteria.id.400	rs10496736	G	C	0.09043	0.01958	2.25e-06	15214
phylum	phylum.Actinobacteria.id.400	rs61470941	C	T	0.08013	0.01709	2.26e-06	18123
phylum	phylum.Actinobacteria.id.400	rs12233092	A	G	0.0767	0.01598	2.27e-06	18118
phylum	phylum.Actinobacteria.id.400	rs1482581	C	T	0.05276	0.01109	2.27e-06	18123
phylum	phylum.Actinobacteria.id.400	rs56174523	C	A	0.06851	0.015	2.27e-06	18123
phylum	phylum.Actinobacteria.id.400	rs7419356	A	T	0.05299	0.0111	2.32e-06	18123
phylum	phylum.Actinobacteria.id.400	rs13402112	C	A	0.06843	0.015	2.32e-06	18123
phylum	phylum.Actinobacteria.id.400	rs11888951	C	T	0.06836	0.015	2.33e-06	18123
phylum	phylum.Actinobacteria.id.400	rs6760553	G	A	0.0683	0.015	2.4e-06	18123
phylum	phylum.Actinobacteria.id.400	rs4480940	C	T	0.05265	0.01108	2.41e-06	18123
phylum	phylum.Actinobacteria.id.400	rs62168934	G	A	0.06839	0.015	2.42e-06	18123
phylum	phylum.Actinobacteria.id.400	rs13413872	T	G	0.06827	0.015	2.44e-06	18123
phylum	phylum.Actinobacteria.id.400	rs584226	C	T	0.07733	0.01614	2.48e-06	18123
phylum	phylum.Actinobacteria.id.400	rs62448887	C	A	-0.0504	0.01076	2.48e-06	18117
phylum	phylum.Actinobacteria.id.400	rs8047955	A	G	0.05207	0.01108	2.5e-06	18113
phylum	phylum.Actinobacteria.id.400	rs58080116	G	A	0.08036	0.0171	2.54e-06	18123
phylum	phylum.Actinobacteria.id.400	rs6430601	T	G	0.06974	0.01526	2.54e-06	18119
phylum	phylum.Actinobacteria.id.400	rs3739022	A	G	0.07974	0.0171	2.55e-06	18123
phylum	phylum.Actinobacteria.id.400	rs6742013	C	T	0.0679	0.01517	2.56e-06	18123
phylum	phylum.Actinobacteria.id.400	rs56211644	C	T	0.0805	0.01703	2.58e-06	18123
phylum	phylum.Actinobacteria.id.400	rs16831498	C	G	0.06813	0.0152	2.68e-06	18123
phylum	phylum.Actinobacteria.id.400	rs60376570	A	G	0.08008	0.01711	2.71e-06	18123
phylum	phylum.Actinobacteria.id.400	rs12992815	G	C	0.07935	0.01697	2.73e-06	18123
phylum	phylum.Actinobacteria.id.400	rs60350840	G	A	0.06797	0.015	2.75e-06	18123
phylum	phylum.Actinobacteria.id.400	rs2322812	G	A	0.07999	0.0171	2.75e-06	18123
phylum	phylum.Actinobacteria.id.400	rs10174944	T	C	0.06791	0.015	2.77e-06	18122
phylum	phylum.Actinobacteria.id.400	rs60433564	C	A	0.08966	0.01958	2.8e-06	15214
phylum	phylum.Actinobacteria.id.400	rs13035345	C	G	0.05243	0.0111	2.85e-06	18123
phylum	phylum.Actinobacteria.id.400	rs57543738	C	T	0.07977	0.01713	2.85e-06	18123
phylum	phylum.Actinobacteria.id.400	rs13008147	G	A	-0.05448	0.01224	2.99e-06	16995
phylum	phylum.Actinobacteria.id.400	rs6749119	G	C	0.06711	0.01494	3.01e-06	18123
phylum	phylum.Actinobacteria.id.400	rs2874874	C	A	0.07961	0.0171	3.06e-06	18123
phylum	phylum.Actinobacteria.id.400	rs62448870	G	A	-0.04995	0.01078	3.13e-06	17915
phylum	phylum.Actinobacteria.id.400	rs17293519	G	A	0.06694	0.01494	3.17e-06	18123
phylum	phylum.Actinobacteria.id.400	rs62287787	T	C	0.05121	0.01096	3.25e-06	18121
phylum	phylum.Actinobacteria.id.400	rs11897204	C	T	0.06697	0.01495	3.3e-06	18123
phylum	phylum.Actinobacteria.id.400	rs55912948	G	A	0.05092	0.01091	3.4e-06	18122
phylum	phylum.Actinobacteria.id.400	rs4954633	T	C	0.08718	0.01944	3.46e-06	15214
phylum	phylum.Actinobacteria.id.400	rs34284163	A	T	-0.06265	0.01363	3.7e-06	18120
phylum	phylum.Actinobacteria.id.400	rs11884903	C	T	0.06691	0.01514	3.71e-06	18123
phylum	phylum.Actinobacteria.id.400	rs6706466	G	A	0.0664	0.01495	3.76e-06	18123
phylum	phylum.Actinobacteria.id.400	rs2305248	G	A	0.06631	0.01495	3.79e-06	18123
phylum	phylum.Actinobacteria.id.400	rs2874834	G	A	0.05768	0.01211	3.92e-06	18123
phylum	phylum.Actinobacteria.id.400	rs6739713	G	A	0.0571	0.01208	4.06e-06	18123
phylum	phylum.Actinobacteria.id.400	rs9833771	T	C	0.04873	0.01062	4.24e-06	18123
phylum	phylum.Actinobacteria.id.400	rs60475440	C	T	0.05024	0.01091	4.55e-06	18122
phylum	phylum.Actinobacteria.id.400	rs80274970	T	C	0.08572	0.01857	4.58e-06	17625
phylum	phylum.Actinobacteria.id.400	rs6709763	A	C	0.06634	0.015	4.58e-06	18123
phylum	phylum.Actinobacteria.id.400	rs55657163	A	G	0.05044	0.01098	4.61e-06	18121
phylum	phylum.Actinobacteria.id.400	rs57074605	C	T	0.05021	0.01091	4.62e-06	18122
phylum	phylum.Actinobacteria.id.400	rs7594509	T	G	0.06542	0.01498	4.69e-06	18123
phylum	phylum.Actinobacteria.id.400	rs72972104	A	G	0.08589	0.01945	4.7e-06	15214
phylum	phylum.Actinobacteria.id.400	rs1397793	G	A	-0.05146	0.01112	4.77e-06	17915
phylum	phylum.Actinobacteria.id.400	rs6721838	G	A	0.06561	0.01502	4.79e-06	18123
phylum	phylum.Actinobacteria.id.400	rs57829242	G	A	0.06636	0.01514	4.88e-06	18123
phylum	phylum.Actinobacteria.id.400	rs11897217	T	C	0.06516	0.01498	4.93e-06	18123
phylum	phylum.Actinobacteria.id.400	rs7605229	T	C	0.06627	0.01517	4.93e-06	18123
phylum	phylum.Actinobacteria.id.400	rs67856226	G	A	0.05006	0.01091	4.99e-06	18122
phylum	phylum.Actinobacteria.id.400	rs13006808	C	A	0.05158	0.01142	5.04e-06	18117
phylum	phylum.Actinobacteria.id.400	rs1551497	C	T	0.066	0.015	5.1e-06	18122
phylum	phylum.Actinobacteria.id.400	rs58764609	T	G	0.04989	0.01091	5.31e-06	18122
phylum	phylum.Actinobacteria.id.400	rs6496870	T	C	0.05044	0.01134	5.49e-06	18123
phylum	phylum.Actinobacteria.id.400	rs857444	C	T	0.04971	0.01095	5.52e-06	18121
phylum	phylum.Actinobacteria.id.400	rs6705610	G	T	0.06472	0.01495	5.59e-06	18123
phylum	phylum.Actinobacteria.id.400	rs11890844	G	A	0.06565	0.01502	5.63e-06	18122
phylum	phylum.Actinobacteria.id.400	rs13402101	A	T	0.06565	0.01502	5.67e-06	18122
phylum	phylum.Actinobacteria.id.400	rs13399376	G	A	0.06565	0.01502	5.67e-06	18122
phylum	phylum.Actinobacteria.id.400	rs12528285	C	T	0.08058	0.01801	5.83e-06	18123
phylum	phylum.Actinobacteria.id.400	rs56369660	G	A	0.06529	0.01495	5.92e-06	18123
phylum	phylum.Actinobacteria.id.400	rs4954226	C	T	0.06569	0.01514	5.95e-06	18123
phylum	phylum.Actinobacteria.id.400	rs6704561	T	C	0.05352	0.0117	5.98e-06	17915
phylum	phylum.Actinobacteria.id.400	rs35215526	A	G	0.08148	0.01776	6.02e-06	18117
phylum	phylum.Actinobacteria.id.400	rs72970286	G	T	0.08647	0.01928	6.03e-06	15212
phylum	phylum.Actinobacteria.id.400	rs4954242	G	A	0.06658	0.01525	6.09e-06	18123
phylum	phylum.Actinobacteria.id.400	rs62170081	G	A	0.08632	0.01958	6.51e-06	15214
phylum	phylum.Actinobacteria.id.400	rs6737635	T	G	0.06522	0.015	6.66e-06	18123
phylum	phylum.Actinobacteria.id.400	rs2322445	A	T	0.06437	0.01497	6.69e-06	18123
phylum	phylum.Actinobacteria.id.400	rs62287783	A	G	0.04932	0.01091	6.86e-06	18122
phylum	phylum.Actinobacteria.id.400	rs16831264	C	G	0.0649	0.01496	6.96e-06	18122
phylum	phylum.Actinobacteria.id.400	rs4954570	C	G	0.05392	0.01218	7.04e-06	18119
phylum	phylum.Actinobacteria.id.400	rs1441337	T	C	0.0506	0.01156	7.53e-06	18122
phylum	phylum.Actinobacteria.id.400	rs62287786	G	A	0.04908	0.01091	7.55e-06	18122
phylum	phylum.Actinobacteria.id.400	rs10513350	C	T	0.09132	0.01971	7.71e-06	16796
phylum	phylum.Actinobacteria.id.400	rs7673556	C	T	0.04911	0.01092	7.71e-06	18120
phylum	phylum.Actinobacteria.id.400	rs13408096	T	G	0.06454	0.01497	7.87e-06	18122
phylum	phylum.Actinobacteria.id.400	rs10871420	G	A	0.04928	0.01103	8.01e-06	18123
phylum	phylum.Actinobacteria.id.400	rs4954213	T	G	0.06455	0.01497	8.11e-06	18122
phylum	phylum.Actinobacteria.id.400	rs6745996	G	A	0.06768	0.01579	8.16e-06	18123
phylum	phylum.Actinobacteria.id.400	rs62287778	C	T	0.04894	0.01092	8.16e-06	18119
phylum	phylum.Actinobacteria.id.400	rs6727889	T	C	0.06497	0.01518	8.27e-06	18123
phylum	phylum.Actinobacteria.id.400	rs62168847	C	T	0.07958	0.01767	8.37e-06	18117
phylum	phylum.Actinobacteria.id.400	rs28539813	T	C	0.04883	0.01092	8.44e-06	18121
phylum	phylum.Actinobacteria.id.400	rs28385412	T	C	0.04871	0.01091	8.68e-06	18123
phylum	phylum.Actinobacteria.id.400	rs10932451	G	A	0.04944	0.01105	8.72e-06	18123
phylum	phylum.Actinobacteria.id.400	rs80124826	T	C	-0.12419	0.02786	8.75e-06	11999
phylum	phylum.Actinobacteria.id.400	rs872151	T	C	0.07421	0.01684	8.77e-06	18123
phylum	phylum.Actinobacteria.id.400	rs62287785	A	G	0.0487	0.01091	8.87e-06	18122
phylum	phylum.Actinobacteria.id.400	rs13192624	T	C	-0.05214	0.01173	9.1e-06	18118
phylum	phylum.Actinobacteria.id.400	rs4312299	C	G	0.04878	0.01104	9.37e-06	18115
phylum	phylum.Actinobacteria.id.400	rs75211493	G	A	0.0838	0.01842	9.38e-06	16738
phylum	phylum.Actinobacteria.id.400	rs4954555	C	T	0.09074	0.02123	9.64e-06	12795
phylum	phylum.Actinobacteria.id.400	rs76355910	T	C	0.05797	0.01314	9.66e-06	18121
phylum	phylum.Actinobacteria.id.400	rs60274701	A	G	0.07511	0.01692	9.71e-06	18122
phylum	phylum.Actinobacteria.id.400	rs11936212	C	G	0.04845	0.01091	9.73e-06	18123
phylum	phylum.Actinobacteria.id.400	rs6743026	T	C	0.05883	0.01342	9.79e-06	18008
phylum	phylum.Actinobacteria.id.400	rs638382	T	C	-0.04831	0.01108	9.85e-06	17313
phylum	phylum.Actinobacteria.id.400	rs10200912	A	G	0.04916	0.01105	9.87e-06	18113
phylum	phylum.Actinobacteria.id.400	rs73659022	T	G	0.08999	0.01968	9.9e-06	16796
phylum	phylum.Bacteroidetes.id.905	rs73846128	A	G	-0.06672	0.01331	3.92e-07	18468
phylum	phylum.Bacteroidetes.id.905	rs7631304	G	A	-0.06625	0.01326	4.01e-07	18468
phylum	phylum.Bacteroidetes.id.905	rs73512608	G	A	-0.12039	0.02356	4.31e-07	11483
phylum	phylum.Bacteroidetes.id.905	rs55773148	G	A	-0.11995	0.02356	4.81e-07	11483
phylum	phylum.Bacteroidetes.id.905	rs11929346	C	T	-0.06549	0.01325	5.51e-07	18468
phylum	phylum.Bacteroidetes.id.905	rs55993203	A	G	-0.11922	0.02356	5.73e-07	11483
phylum	phylum.Bacteroidetes.id.905	rs35800684	A	G	-0.06519	0.01325	6.11e-07	18468
phylum	phylum.Bacteroidetes.id.905	rs60610351	A	T	-0.11908	0.02356	6.23e-07	11483
phylum	phylum.Bacteroidetes.id.905	rs7611599	T	C	-0.06501	0.01326	6.48e-07	18468
phylum	phylum.Bacteroidetes.id.905	rs56358950	C	T	-0.11893	0.02356	6.88e-07	11483
phylum	phylum.Bacteroidetes.id.905	rs58269684	T	C	-0.11861	0.02356	7.17e-07	11483
phylum	phylum.Bacteroidetes.id.905	rs74090639	A	G	-0.11879	0.02356	7.2e-07	11483
phylum	phylum.Bacteroidetes.id.905	rs74937713	T	A	-0.06462	0.01319	7.51e-07	18460
phylum	phylum.Bacteroidetes.id.905	rs112343530	C	T	-0.11694	0.02357	8.14e-07	11483
phylum	phylum.Bacteroidetes.id.905	rs7629132	T	C	-0.06438	0.01319	8.22e-07	18459
phylum	phylum.Bacteroidetes.id.905	rs58298316	G	T	-0.11777	0.02356	8.6e-07	11483
phylum	phylum.Bacteroidetes.id.905	rs2210451	G	C	-0.11723	0.02357	8.65e-07	11483
phylum	phylum.Bacteroidetes.id.905	rs74090627	T	C	-0.11716	0.02357	8.77e-07	11483
phylum	phylum.Bacteroidetes.id.905	rs7337863	A	C	-0.11631	0.02375	8.78e-07	11483
phylum	phylum.Bacteroidetes.id.905	rs2150960	C	G	-0.11706	0.02357	8.81e-07	11483
phylum	phylum.Bacteroidetes.id.905	rs2210454	T	C	-0.1173	0.02357	8.96e-07	11483
phylum	phylum.Bacteroidetes.id.905	rs112675712	C	T	-0.11623	0.02357	8.96e-07	11483
phylum	phylum.Bacteroidetes.id.905	rs60614038	A	T	-0.11734	0.02356	9.57e-07	11483
phylum	phylum.Bacteroidetes.id.905	rs17085771	T	A	-0.11723	0.02354	9.6e-07	11483
phylum	phylum.Bacteroidetes.id.905	rs73846120	G	A	-0.06435	0.01331	9.72e-07	18468
phylum	phylum.Bacteroidetes.id.905	rs11920519	G	A	-0.06392	0.01317	9.75e-07	18465
phylum	phylum.Bacteroidetes.id.905	rs56949730	G	A	-0.11663	0.02357	9.81e-07	11483
phylum	phylum.Bacteroidetes.id.905	rs71322866	C	A	-0.06434	0.0133	9.86e-07	18468
phylum	phylum.Bacteroidetes.id.905	rs12486528	A	G	-0.06467	0.01339	9.92e-07	18468
phylum	phylum.Bacteroidetes.id.905	rs80015632	G	C	-0.11653	0.02357	1.01e-06	11483
phylum	phylum.Bacteroidetes.id.905	rs9788409	C	T	-0.11699	0.02354	1.01e-06	11483
phylum	phylum.Bacteroidetes.id.905	rs2210452	A	G	-0.11629	0.02357	1.02e-06	11483
phylum	phylum.Bacteroidetes.id.905	rs36076607	C	T	-0.06342	0.01314	1.02e-06	18468
phylum	phylum.Bacteroidetes.id.905	rs11916046	A	C	-0.06384	0.0132	1.04e-06	18468
phylum	phylum.Bacteroidetes.id.905	rs1996069	C	T	-0.06416	0.01329	1.07e-06	18468
phylum	phylum.Bacteroidetes.id.905	rs17085818	C	A	-0.11648	0.02353	1.11e-06	11483
phylum	phylum.Bacteroidetes.id.905	rs111845179	T	C	0.10196	0.02133	1.18e-06	16527
phylum	phylum.Bacteroidetes.id.905	rs73975615	G	A	-0.20716	0.04426	1.2e-06	3350
phylum	phylum.Bacteroidetes.id.905	rs34519192	G	A	-0.06334	0.01318	1.21e-06	18457
phylum	phylum.Bacteroidetes.id.905	rs1040016	T	G	-0.06331	0.01319	1.26e-06	18468
phylum	phylum.Bacteroidetes.id.905	rs12938514	A	G	-0.20109	0.0416	1.27e-06	3350
phylum	phylum.Bacteroidetes.id.905	rs2346325	G	A	-0.06325	0.01319	1.29e-06	18468
phylum	phylum.Bacteroidetes.id.905	rs6794198	T	C	-0.06318	0.01323	1.29e-06	18457
phylum	phylum.Bacteroidetes.id.905	rs35532963	G	C	-0.0632	0.01318	1.3e-06	18457
phylum	phylum.Bacteroidetes.id.905	rs907713	C	A	-0.06352	0.0133	1.31e-06	18468
phylum	phylum.Bacteroidetes.id.905	rs17085798	A	C	-0.11542	0.02354	1.33e-06	11483
phylum	phylum.Bacteroidetes.id.905	rs2346324	G	A	-0.06315	0.01319	1.35e-06	18468
phylum	phylum.Bacteroidetes.id.905	rs11916939	A	G	-0.06311	0.01321	1.38e-06	18468
phylum	phylum.Bacteroidetes.id.905	rs71322864	A	C	-0.06294	0.01323	1.43e-06	18457
phylum	phylum.Bacteroidetes.id.905	rs12496485	A	G	-0.06341	0.01332	1.43e-06	18468
phylum	phylum.Bacteroidetes.id.905	rs3946805	G	A	-0.06293	0.01319	1.44e-06	18468
phylum	phylum.Bacteroidetes.id.905	rs34922683	T	G	-0.06304	0.01321	1.46e-06	18468
phylum	phylum.Bacteroidetes.id.905	rs13100590	C	T	-0.06278	0.01319	1.55e-06	18468
phylum	phylum.Bacteroidetes.id.905	rs34046877	C	T	-0.06257	0.01321	1.58e-06	18457
phylum	phylum.Bacteroidetes.id.905	rs17026821	C	T	-0.06269	0.01319	1.6e-06	18468
phylum	phylum.Bacteroidetes.id.905	rs35176045	T	C	-0.06248	0.01326	1.67e-06	18468
phylum	phylum.Bacteroidetes.id.905	rs7338117	G	A	-0.11394	0.02374	1.68e-06	11483
phylum	phylum.Bacteroidetes.id.905	rs11871360	G	A	-0.20378	0.04418	1.7e-06	3350
phylum	phylum.Bacteroidetes.id.905	rs13060907	A	G	-0.06258	0.01324	1.71e-06	18466
phylum	phylum.Bacteroidetes.id.905	rs17085738	G	T	-0.11394	0.02373	1.71e-06	11483
phylum	phylum.Bacteroidetes.id.905	rs17085746	G	A	-0.11394	0.02373	1.71e-06	11483
phylum	phylum.Bacteroidetes.id.905	rs2225529	T	C	-0.11381	0.02375	1.73e-06	11475
phylum	phylum.Bacteroidetes.id.905	rs4474577	A	G	-0.11648	0.02427	1.82e-06	11002
phylum	phylum.Bacteroidetes.id.905	rs2032750	T	C	-0.05072	0.01064	1.86e-06	17987
phylum	phylum.Bacteroidetes.id.905	rs6777119	C	T	-0.06222	0.01319	1.87e-06	18468
phylum	phylum.Bacteroidetes.id.905	rs17026797	T	G	-0.06217	0.01321	2.05e-06	18466
phylum	phylum.Bacteroidetes.id.905	rs73510191	C	A	-0.11341	0.02357	2.1e-06	11480
phylum	phylum.Bacteroidetes.id.905	rs6791217	T	G	-0.06196	0.01325	2.18e-06	18466
phylum	phylum.Bacteroidetes.id.905	rs13097740	A	G	-0.06142	0.01321	2.23e-06	18466
phylum	phylum.Bacteroidetes.id.905	rs73510178	A	G	-0.11249	0.02375	2.23e-06	11483
phylum	phylum.Bacteroidetes.id.905	rs35665203	C	T	-0.06214	0.01332	2.27e-06	18468
phylum	phylum.Bacteroidetes.id.905	rs60660711	A	G	-0.11258	0.0237	2.3e-06	11481
phylum	phylum.Bacteroidetes.id.905	rs60722059	G	A	-0.11238	0.02375	2.32e-06	11483
phylum	phylum.Bacteroidetes.id.905	rs61070599	T	C	-0.11263	0.02373	2.43e-06	11483
phylum	phylum.Bacteroidetes.id.905	rs56335733	T	C	-0.11287	0.02373	2.48e-06	11483
phylum	phylum.Bacteroidetes.id.905	rs1996068	G	A	-0.06157	0.01319	2.5e-06	18466
phylum	phylum.Bacteroidetes.id.905	rs60475411	C	T	-0.06131	0.01316	2.51e-06	18457
phylum	phylum.Bacteroidetes.id.905	rs74090631	G	A	-0.11197	0.02375	2.59e-06	11483
phylum	phylum.Bacteroidetes.id.905	rs73510184	T	C	-0.11197	0.02375	2.59e-06	11483
phylum	phylum.Bacteroidetes.id.905	rs7546249	T	A	-0.05536	0.0118	2.6e-06	18467
phylum	phylum.Bacteroidetes.id.905	rs73512626	A	C	-0.11218	0.02371	2.6e-06	11483
phylum	phylum.Bacteroidetes.id.905	rs60869989	A	G	-0.11195	0.02373	2.69e-06	11483
phylum	phylum.Bacteroidetes.id.905	rs71322865	T	C	-0.06047	0.01314	2.75e-06	18468
phylum	phylum.Bacteroidetes.id.905	rs7337151	C	A	-0.11171	0.02375	2.77e-06	11483
phylum	phylum.Bacteroidetes.id.905	rs74090626	G	A	-0.11161	0.02374	2.81e-06	11483
phylum	phylum.Bacteroidetes.id.905	rs60814075	T	C	-0.11152	0.02374	2.81e-06	11483
phylum	phylum.Bacteroidetes.id.905	rs34986288	A	G	-0.06178	0.01349	2.9e-06	18463
phylum	phylum.Bacteroidetes.id.905	rs61289215	T	C	-0.11189	0.02373	2.93e-06	11483
phylum	phylum.Bacteroidetes.id.905	rs7320487	C	T	-0.11085	0.02374	3e-06	11483
phylum	phylum.Bacteroidetes.id.905	rs7319197	G	A	-0.11083	0.02373	3e-06	11483
phylum	phylum.Bacteroidetes.id.905	rs73846124	A	G	-0.06084	0.01326	3.1e-06	18468
phylum	phylum.Bacteroidetes.id.905	rs7491419	G	T	-0.11126	0.02375	3.12e-06	11483
phylum	phylum.Bacteroidetes.id.905	rs60954548	G	A	-0.1113	0.02371	3.24e-06	11483
phylum	phylum.Bacteroidetes.id.905	rs75808613	A	G	-0.11069	0.02375	3.42e-06	11483
phylum	phylum.Bacteroidetes.id.905	rs78745799	T	G	-0.11069	0.02375	3.42e-06	11483
phylum	phylum.Bacteroidetes.id.905	rs1014718	A	G	-0.05506	0.01187	3.45e-06	18468
phylum	phylum.Bacteroidetes.id.905	rs17085756	A	G	-0.11079	0.02371	3.56e-06	11483
phylum	phylum.Bacteroidetes.id.905	rs1888900	C	T	-0.11079	0.02357	3.64e-06	11483
phylum	phylum.Bacteroidetes.id.905	rs17085776	G	A	-0.11078	0.02371	3.65e-06	11483
phylum	phylum.Bacteroidetes.id.905	rs2183908	C	T	-0.10981	0.02374	3.69e-06	11483
phylum	phylum.Bacteroidetes.id.905	rs1555070	T	C	-0.05472	0.01184	3.76e-06	18463
phylum	phylum.Bacteroidetes.id.905	rs74090642	G	A	-0.11069	0.02373	3.78e-06	11483
phylum	phylum.Bacteroidetes.id.905	rs17085809	G	A	-0.11018	0.0237	3.79e-06	11483
phylum	phylum.Bacteroidetes.id.905	rs17085765	C	G	-0.1105	0.02371	3.87e-06	11483
phylum	phylum.Bacteroidetes.id.905	rs17085785	T	C	-0.11022	0.02371	3.94e-06	11483
phylum	phylum.Bacteroidetes.id.905	rs13291169	C	G	0.06833	0.01481	3.97e-06	17647
phylum	phylum.Bacteroidetes.id.905	rs1022523	G	A	-0.05433	0.01181	4.12e-06	18467
phylum	phylum.Bacteroidetes.id.905	rs2138406	T	G	0.05965	0.01312	4.14e-06	18467
phylum	phylum.Bacteroidetes.id.905	rs17085791	C	G	-0.1094	0.0237	4.44e-06	11483
phylum	phylum.Bacteroidetes.id.905	rs13291434	T	C	0.06877	0.01491	4.6e-06	17534
phylum	phylum.Bacteroidetes.id.905	rs2875575	C	G	-0.10963	0.02359	4.61e-06	11483
phylum	phylum.Bacteroidetes.id.905	rs73510192	C	T	-0.10998	0.02406	4.65e-06	11002
phylum	phylum.Bacteroidetes.id.905	rs59082732	G	T	-0.10971	0.02371	4.72e-06	11483
phylum	phylum.Bacteroidetes.id.905	rs12486971	C	T	-0.06107	0.01358	4.82e-06	18461
phylum	phylum.Bacteroidetes.id.905	rs1325597	T	G	-0.05404	0.01185	4.83e-06	18468
phylum	phylum.Bacteroidetes.id.905	rs1888899	T	C	-0.10966	0.02358	4.86e-06	11483
phylum	phylum.Bacteroidetes.id.905	rs7857688	A	G	0.06355	0.014	5.04e-06	17657
phylum	phylum.Bacteroidetes.id.905	rs7157380	C	G	0.09559	0.02123	5.31e-06	17431
phylum	phylum.Bacteroidetes.id.905	rs17343978	A	C	-0.05599	0.01198	5.71e-06	18468
phylum	phylum.Bacteroidetes.id.905	rs73510188	A	G	-0.10864	0.02406	5.85e-06	11002
phylum	phylum.Bacteroidetes.id.905	rs73510190	C	G	-0.10864	0.02406	5.85e-06	11002
phylum	phylum.Bacteroidetes.id.905	rs929878	C	T	-0.05381	0.01211	6.53e-06	18468
phylum	phylum.Bacteroidetes.id.905	rs73975618	G	A	-0.18926	0.0428	6.77e-06	3350
phylum	phylum.Bacteroidetes.id.905	rs72706335	T	C	-0.22319	0.04934	7.13e-06	3820
phylum	phylum.Bacteroidetes.id.905	rs7999780	G	A	0.05473	0.01236	7.68e-06	18458
phylum	phylum.Bacteroidetes.id.905	rs10451505	A	G	-0.05287	0.01221	7.87e-06	17987
phylum	phylum.Bacteroidetes.id.905	rs79037	A	G	-0.05511	0.01198	7.95e-06	18468
phylum	phylum.Bacteroidetes.id.905	rs9648077	T	C	-0.04788	0.0107	8.1e-06	18464
phylum	phylum.Bacteroidetes.id.905	rs6586324	T	C	0.04737	0.01051	8.17e-06	18465
phylum	phylum.Bacteroidetes.id.905	rs62531359	T	G	0.06561	0.01493	8.26e-06	18454
phylum	phylum.Bacteroidetes.id.905	rs34380401	C	T	-0.05941	0.01358	8.74e-06	18461
phylum	phylum.Bacteroidetes.id.905	rs62575403	C	T	0.13602	0.03084	8.9e-06	9802
phylum	phylum.Bacteroidetes.id.905	rs2418267	A	G	0.05936	0.0135	1e-05	17657
phylum	phylum.Cyanobacteria.id.1500	rs2005426	A	C	-0.14086	0.0268	1.48e-07	6997
phylum	phylum.Cyanobacteria.id.1500	rs789068	G	A	-0.11119	0.0212	1.48e-07	7189
phylum	phylum.Cyanobacteria.id.1500	rs789069	A	C	-0.1108	0.02124	1.73e-07	7189
phylum	phylum.Cyanobacteria.id.1500	rs9864379	T	C	-0.13907	0.02671	1.8e-07	7001
phylum	phylum.Cyanobacteria.id.1500	rs789067	T	C	-0.11048	0.02121	1.82e-07	7187
phylum	phylum.Cyanobacteria.id.1500	rs9830438	C	A	-0.13839	0.02671	2.05e-07	7001
phylum	phylum.Cyanobacteria.id.1500	rs900188	G	A	-0.13801	0.02671	2.51e-07	7000
phylum	phylum.Cyanobacteria.id.1500	rs789063	G	A	-0.1041	0.02066	6.61e-07	7197
phylum	phylum.Cyanobacteria.id.1500	rs67057512	A	G	-0.10711	0.0213	7.49e-07	7194
phylum	phylum.Cyanobacteria.id.1500	rs66464540	A	G	-0.10358	0.02086	1.06e-06	7189
phylum	phylum.Cyanobacteria.id.1500	rs789073	A	G	-0.1018	0.02069	1.09e-06	7196
phylum	phylum.Cyanobacteria.id.1500	rs9864035	A	G	-0.12956	0.0267	1.11e-06	6999
phylum	phylum.Cyanobacteria.id.1500	rs76531781	T	C	-0.23499	0.04877	1.62e-06	3737
phylum	phylum.Cyanobacteria.id.1500	rs789061	A	G	-0.1006	0.02067	1.77e-06	7196
phylum	phylum.Cyanobacteria.id.1500	rs9883109	C	T	-0.1257	0.02663	2.12e-06	7001
phylum	phylum.Cyanobacteria.id.1500	rs12493406	T	C	-0.12703	0.02668	2.87e-06	7001
phylum	phylum.Cyanobacteria.id.1500	rs13062781	A	G	-0.12015	0.02594	2.99e-06	6998
phylum	phylum.Cyanobacteria.id.1500	rs6773199	A	G	-0.12292	0.02617	3.04e-06	6999
phylum	phylum.Cyanobacteria.id.1500	rs12486770	A	T	-0.12627	0.02668	3.28e-06	7001
phylum	phylum.Cyanobacteria.id.1500	rs62231951	T	A	-0.12608	0.02668	3.37e-06	7001
phylum	phylum.Cyanobacteria.id.1500	rs6442436	T	C	-0.12276	0.0266	3.52e-06	7000
phylum	phylum.Cyanobacteria.id.1500	rs6780959	G	A	-0.1225	0.0266	3.61e-06	7000
phylum	phylum.Cyanobacteria.id.1500	rs9748924	T	C	-0.10007	0.02127	3.68e-06	7195
phylum	phylum.Cyanobacteria.id.1500	rs1010755	T	C	-0.12233	0.02658	3.8e-06	7001
phylum	phylum.Cyanobacteria.id.1500	rs13072505	G	A	-0.12219	0.02659	3.85e-06	7001
phylum	phylum.Cyanobacteria.id.1500	rs145461062	T	C	-0.09985	0.02127	3.89e-06	7195
phylum	phylum.Cyanobacteria.id.1500	rs9863760	T	C	-0.12011	0.02597	3.9e-06	7000
phylum	phylum.Cyanobacteria.id.1500	rs7148504	G	T	0.08149	0.01757	3.97e-06	7197
phylum	phylum.Cyanobacteria.id.1500	rs17039205	G	A	-0.12166	0.0266	4.03e-06	7001
phylum	phylum.Cyanobacteria.id.1500	rs17039208	C	T	-0.12125	0.02659	4.28e-06	7001
phylum	phylum.Cyanobacteria.id.1500	rs13095126	C	T	-0.12151	0.0266	4.45e-06	7001
phylum	phylum.Cyanobacteria.id.1500	rs13072444	A	G	-0.12142	0.0266	4.51e-06	7001
phylum	phylum.Cyanobacteria.id.1500	rs584122	C	T	-0.14996	0.03244	4.54e-06	7001
phylum	phylum.Cyanobacteria.id.1500	rs10510427	A	G	-0.1228	0.02638	4.79e-06	7001
phylum	phylum.Cyanobacteria.id.1500	rs13072729	C	T	-0.1217	0.02662	4.82e-06	6999
phylum	phylum.Cyanobacteria.id.1500	rs13098772	A	C	-0.12278	0.02664	4.87e-06	6999
phylum	phylum.Cyanobacteria.id.1500	rs2314810	C	G	-0.21473	0.04601	4.95e-06	4013
phylum	phylum.Cyanobacteria.id.1500	rs13072359	C	A	-0.12083	0.0266	5.06e-06	7001
phylum	phylum.Cyanobacteria.id.1500	rs13088024	A	T	-0.12046	0.0266	5.27e-06	7001
phylum	phylum.Cyanobacteria.id.1500	rs77174685	C	A	-0.24875	0.05389	5.36e-06	3157
phylum	phylum.Cyanobacteria.id.1500	rs12714903	T	C	-0.12024	0.0266	5.43e-06	7001
phylum	phylum.Cyanobacteria.id.1500	rs13060131	T	C	-0.12025	0.0266	5.43e-06	7001
phylum	phylum.Cyanobacteria.id.1500	rs12714902	A	G	-0.12026	0.0266	5.44e-06	7001
phylum	phylum.Cyanobacteria.id.1500	rs12714900	T	G	-0.12014	0.0266	5.51e-06	7001
phylum	phylum.Cyanobacteria.id.1500	rs615396	G	A	-0.14776	0.03244	5.64e-06	7001
phylum	phylum.Cyanobacteria.id.1500	rs1567601	A	T	-0.09874	0.02155	5.82e-06	6761
phylum	phylum.Cyanobacteria.id.1500	rs13072044	T	G	-0.12232	0.02727	6.13e-06	6565
phylum	phylum.Cyanobacteria.id.1500	rs12491989	G	C	-0.12017	0.02665	6.14e-06	7001
phylum	phylum.Cyanobacteria.id.1500	rs2553290	A	T	0.0934	0.02015	6.25e-06	7192
phylum	phylum.Cyanobacteria.id.1500	rs4407129	T	C	-0.09492	0.02069	6.3e-06	7197
phylum	phylum.Cyanobacteria.id.1500	rs4494631	G	A	-0.09473	0.02068	6.33e-06	7196
phylum	phylum.Cyanobacteria.id.1500	rs545090	C	T	-0.14684	0.03244	6.58e-06	7001
phylum	phylum.Cyanobacteria.id.1500	rs616178	A	C	-0.14642	0.03244	6.83e-06	7001
phylum	phylum.Cyanobacteria.id.1500	rs33957528	T	C	-0.07751	0.01743	7.93e-06	6761
phylum	phylum.Cyanobacteria.id.1500	rs7644367	A	G	-0.1178	0.02659	8.01e-06	7001
phylum	phylum.Cyanobacteria.id.1500	rs789050	A	G	-0.09628	0.02123	8.46e-06	7192
phylum	phylum.Cyanobacteria.id.1500	rs9832125	T	C	-0.11231	0.0258	9.04e-06	7000
phylum	phylum.Cyanobacteria.id.1500	rs2608306	G	A	0.09171	0.02015	9.18e-06	7197
phylum	phylum.Cyanobacteria.id.1500	rs2608309	A	G	0.0915	0.02016	9.81e-06	7197
phylum	phylum.Cyanobacteria.id.1500	rs12555298	G	A	0.09599	0.02182	9.93e-06	7175
phylum	phylum.Euryarchaeota.id.55	rs10202904	T	G	-0.11599	0.02303	6.19e-07	3861
phylum	phylum.Euryarchaeota.id.55	rs10206171	T	C	-0.11244	0.02473	6.58e-06	3483
phylum	phylum.Euryarchaeota.id.55	rs11022995	G	A	-0.10373	0.02289	7.73e-06	3864
phylum	phylum.Euryarchaeota.id.55	rs11147839	A	G	0.21077	0.04369	1.75e-06	3662
phylum	phylum.Euryarchaeota.id.55	rs12155661	T	C	-0.11677	0.02644	9.15e-06	3855
phylum	phylum.Euryarchaeota.id.55	rs12711690	A	G	-0.10813	0.02304	3.44e-06	3857
phylum	phylum.Euryarchaeota.id.55	rs1869500	C	A	-0.11394	0.02303	9.85e-07	3858
phylum	phylum.Euryarchaeota.id.55	rs34928225	T	C	0.19977	0.04254	4.34e-06	3483
phylum	phylum.Euryarchaeota.id.55	rs3923545	C	G	0.20855	0.04369	1.88e-06	3661
phylum	phylum.Euryarchaeota.id.55	rs41288287	T	C	0.20064	0.04358	5.39e-06	3664
phylum	phylum.Euryarchaeota.id.55	rs45498998	G	A	-0.13188	0.02923	5.32e-06	3850
phylum	phylum.Euryarchaeota.id.55	rs45567540	C	G	-0.12954	0.02925	7.72e-06	3852
phylum	phylum.Euryarchaeota.id.55	rs4848258	T	A	-0.10488	0.02304	6.62e-06	3861
phylum	phylum.Euryarchaeota.id.55	rs4848970	T	G	0.11479	0.02389	1.51e-06	3862
phylum	phylum.Euryarchaeota.id.55	rs56001610	A	G	-0.18588	0.04109	9.95e-06	3544
phylum	phylum.Euryarchaeota.id.55	rs56131665	G	A	0.17676	0.03858	5.3e-06	3736
phylum	phylum.Euryarchaeota.id.55	rs56209241	A	G	-0.19377	0.04153	4.86e-06	3501
phylum	phylum.Euryarchaeota.id.55	rs58106718	T	A	-0.18202	0.0406	9.41e-06	3546
phylum	phylum.Euryarchaeota.id.55	rs6064552	T	C	-0.12361	0.02758	9.34e-06	3775
phylum	phylum.Euryarchaeota.id.55	rs62240373	A	G	-0.19032	0.04113	5.93e-06	3544
phylum	phylum.Euryarchaeota.id.55	rs62240380	T	C	-0.18397	0.04057	7.63e-06	3546
phylum	phylum.Euryarchaeota.id.55	rs62240384	T	C	-0.18672	0.04061	5.72e-06	3546
phylum	phylum.Euryarchaeota.id.55	rs62240385	G	T	-0.19165	0.04116	4.85e-06	3503
phylum	phylum.Euryarchaeota.id.55	rs62240388	G	A	-0.18683	0.04111	7.62e-06	3503
phylum	phylum.Euryarchaeota.id.55	rs62241832	A	G	-0.18801	0.04123	8.23e-06	3544
phylum	phylum.Euryarchaeota.id.55	rs62241834	T	G	-0.19233	0.0412	5.07e-06	3544
phylum	phylum.Euryarchaeota.id.55	rs62241835	G	T	-0.19392	0.04106	3.78e-06	3544
phylum	phylum.Euryarchaeota.id.55	rs62241836	T	C	-0.19379	0.04114	3.76e-06	3544
phylum	phylum.Euryarchaeota.id.55	rs62241844	C	G	-0.18598	0.04109	9.95e-06	3544
phylum	phylum.Euryarchaeota.id.55	rs62241845	A	T	-0.18598	0.04109	9.95e-06	3544
phylum	phylum.Euryarchaeota.id.55	rs6508769	T	C	0.15053	0.03371	8.13e-06	3483
phylum	phylum.Euryarchaeota.id.55	rs6541968	C	T	-0.10581	0.02302	5.41e-06	3864
phylum	phylum.Euryarchaeota.id.55	rs6776814	T	C	-0.18481	0.04038	7.12e-06	3546
phylum	phylum.Euryarchaeota.id.55	rs6784384	A	G	-0.18715	0.04061	5.46e-06	3546
phylum	phylum.Euryarchaeota.id.55	rs7015093	G	A	-0.11811	0.02644	7.2e-06	3855
phylum	phylum.Euryarchaeota.id.55	rs73031978	C	G	-0.19752	0.04145	2.74e-06	3501
phylum	phylum.Euryarchaeota.id.55	rs73457410	A	G	0.20801	0.04285	2.37e-06	3661
phylum	phylum.Euryarchaeota.id.55	rs73457427	A	G	0.21293	0.04379	1.26e-06	3660
phylum	phylum.Euryarchaeota.id.55	rs73475126	G	T	0.19936	0.04415	6.89e-06	3546
phylum	phylum.Euryarchaeota.id.55	rs74599069	A	C	0.21845	0.04857	8.72e-06	3386
phylum	phylum.Euryarchaeota.id.55	rs7601415	A	T	-0.11444	0.02303	8.96e-07	3858
phylum	phylum.Euryarchaeota.id.55	rs76029318	T	C	0.21486	0.04384	1.05e-06	3660
phylum	phylum.Euryarchaeota.id.55	rs7635189	G	A	0.11998	0.02594	4.64e-06	3483
phylum	phylum.Euryarchaeota.id.55	rs7635580	A	G	-0.18483	0.04086	8.99e-06	3546
phylum	phylum.Euryarchaeota.id.55	rs77658038	A	C	-0.16016	0.03408	4.74e-06	3810
phylum	phylum.Euryarchaeota.id.55	rs894996	C	A	0.20358	0.044	5.12e-06	3746
phylum	phylum.Euryarchaeota.id.55	rs9477075	A	G	-0.15464	0.03328	7.58e-06	3863
phylum	phylum.Euryarchaeota.id.55	rs9532770	C	T	0.12634	0.02712	3.74e-06	3483
phylum	phylum.Euryarchaeota.id.55	rs9594528	G	A	0.19527	0.04368	9.37e-06	3664
phylum	phylum.Euryarchaeota.id.55	rs9594529	G	A	0.19718	0.04421	8.37e-06	3546
phylum	phylum.Euryarchaeota.id.55	rs9594530	C	T	0.21078	0.04377	1.6e-06	3661
phylum	phylum.Euryarchaeota.id.55	rs9942108	A	G	-0.19367	0.04131	4.01e-06	3503
phylum	phylum.Euryarchaeota.id.55	rs9942109	A	G	-0.18952	0.04112	6.05e-06	3544
phylum	phylum.Firmicutes.id.1672	rs3792064	G	A	0.09042	0.01821	5.02e-07	17945
phylum	phylum.Firmicutes.id.1672	rs10209007	G	C	0.08999	0.0182	5.5e-07	17945
phylum	phylum.Firmicutes.id.1672	rs3792068	G	A	0.08794	0.0182	9.54e-07	17945
phylum	phylum.Firmicutes.id.1672	rs2009919	T	C	0.05201	0.01059	9.86e-07	17992
phylum	phylum.Firmicutes.id.1672	rs28814056	C	G	0.08642	0.01814	1.49e-06	17947
phylum	phylum.Firmicutes.id.1672	rs112334273	G	A	0.06052	0.01269	1.97e-06	18350
phylum	phylum.Firmicutes.id.1672	rs13386595	G	A	0.08539	0.01818	1.98e-06	17946
phylum	phylum.Firmicutes.id.1672	rs11683620	G	A	0.08505	0.01807	2.19e-06	17949
phylum	phylum.Firmicutes.id.1672	rs58181266	A	G	0.08333	0.01807	2.93e-06	17950
phylum	phylum.Firmicutes.id.1672	rs113037048	T	C	0.08368	0.01809	2.97e-06	17950
phylum	phylum.Firmicutes.id.1672	rs6436974	A	G	0.08349	0.01811	3.23e-06	17950
phylum	phylum.Firmicutes.id.1672	rs6436973	G	C	0.08311	0.01808	3.54e-06	17950
phylum	phylum.Firmicutes.id.1672	rs7601602	G	A	0.08322	0.01808	3.71e-06	17948
phylum	phylum.Firmicutes.id.1672	rs13411251	G	T	0.08345	0.01815	3.75e-06	17950
phylum	phylum.Firmicutes.id.1672	rs11690370	T	C	0.08315	0.01813	3.75e-06	17950
phylum	phylum.Firmicutes.id.1672	rs13421739	C	G	0.09262	0.01794	3.89e-06	18473
phylum	phylum.Firmicutes.id.1672	rs1968246	C	T	0.04945	0.01066	3.99e-06	17878
phylum	phylum.Firmicutes.id.1672	rs28651047	T	C	0.08324	0.01815	4e-06	17950
phylum	phylum.Firmicutes.id.1672	rs74905079	G	A	0.08274	0.01808	4.1e-06	17949
phylum	phylum.Firmicutes.id.1672	rs7975768	C	G	0.05024	0.01088	4.11e-06	17992
phylum	phylum.Firmicutes.id.1672	rs2332027	G	A	-0.048	0.01044	4.22e-06	18473
phylum	phylum.Firmicutes.id.1672	rs11689387	G	A	0.08243	0.01809	4.24e-06	17950
phylum	phylum.Firmicutes.id.1672	rs2273429	A	G	-0.07234	0.01525	4.44e-06	18470
phylum	phylum.Firmicutes.id.1672	rs10164700	A	G	0.08245	0.01815	4.46e-06	17950
phylum	phylum.Firmicutes.id.1672	rs7247191	T	C	-0.07102	0.01569	4.86e-06	18473
phylum	phylum.Firmicutes.id.1672	rs6711453	G	A	0.08235	0.01815	5.11e-06	17950
phylum	phylum.Firmicutes.id.1672	rs72771021	C	T	-0.14136	0.03083	5.12e-06	9068
phylum	phylum.Firmicutes.id.1672	rs9973480	C	A	0.08259	0.01823	5.13e-06	17949
phylum	phylum.Firmicutes.id.1672	rs11846847	A	T	-0.0718	0.01526	5.4e-06	18470
phylum	phylum.Firmicutes.id.1672	rs3852931	C	T	-0.04761	0.01046	5.47e-06	18393
phylum	phylum.Firmicutes.id.1672	rs10169367	T	C	0.09063	0.01797	5.5e-06	18473
phylum	phylum.Firmicutes.id.1672	rs11844758	A	C	-0.07137	0.01525	5.66e-06	18473
phylum	phylum.Firmicutes.id.1672	rs6752031	T	C	0.08182	0.01815	5.67e-06	17950
phylum	phylum.Firmicutes.id.1672	rs2220596	G	A	-0.06973	0.01573	6.01e-06	18473
phylum	phylum.Firmicutes.id.1672	rs2547978	A	G	0.0472	0.01047	6.02e-06	18471
phylum	phylum.Firmicutes.id.1672	rs36111799	C	T	-0.04752	0.0105	6.13e-06	18359
phylum	phylum.Firmicutes.id.1672	rs12554342	G	C	-0.05263	0.01165	6.15e-06	18465
phylum	phylum.Firmicutes.id.1672	rs11108755	A	T	0.04944	0.01091	6.17e-06	17992
phylum	phylum.Firmicutes.id.1672	rs7593057	G	C	0.08107	0.01808	6.19e-06	17950
phylum	phylum.Firmicutes.id.1672	rs7557870	T	A	0.09682	0.0187	6.43e-06	17992
phylum	phylum.Firmicutes.id.1672	rs1374597	T	G	0.09083	0.01798	6.57e-06	18473
phylum	phylum.Firmicutes.id.1672	rs72738886	T	C	0.08673	0.01896	6.58e-06	17067
phylum	phylum.Firmicutes.id.1672	rs4750583	A	G	0.06076	0.01374	7.06e-06	17067
phylum	phylum.Firmicutes.id.1672	rs6815608	T	C	0.09341	0.02102	7.09e-06	16864
phylum	phylum.Firmicutes.id.1672	rs7203904	C	G	0.05442	0.0122	7.44e-06	17992
phylum	phylum.Firmicutes.id.1672	rs1568247	A	G	0.08039	0.01813	7.8e-06	17950
phylum	phylum.Firmicutes.id.1672	rs10933355	A	G	0.0805	0.01815	7.82e-06	17951
phylum	phylum.Firmicutes.id.1672	rs7600092	T	C	0.09618	0.01871	7.96e-06	17992
phylum	phylum.Firmicutes.id.1672	rs12983973	A	G	-0.06889	0.01567	8.12e-06	18470
phylum	phylum.Firmicutes.id.1672	rs2547979	C	T	0.04654	0.01047	8.34e-06	18471
phylum	phylum.Firmicutes.id.1672	rs8085381	G	A	0.06461	0.01458	8.51e-06	18472
phylum	phylum.Firmicutes.id.1672	rs10201035	T	C	0.08827	0.01835	8.51e-06	18473
phylum	phylum.Firmicutes.id.1672	rs992074	C	T	0.23349	0.0509	8.52e-06	3501
phylum	phylum.Firmicutes.id.1672	rs13401441	T	G	0.09551	0.01868	8.55e-06	17992
phylum	phylum.Firmicutes.id.1672	rs56199908	T	C	-0.18619	0.04105	8.66e-06	5618
phylum	phylum.Firmicutes.id.1672	rs1497088	C	G	-0.06991	0.01524	8.68e-06	18473
phylum	phylum.Firmicutes.id.1672	rs2547962	A	T	0.04658	0.01047	8.7e-06	18469
phylum	phylum.Firmicutes.id.1672	rs1963579	A	T	-0.06846	0.01577	8.7e-06	18473
phylum	phylum.Firmicutes.id.1672	rs58880850	C	A	-0.06852	0.01573	8.72e-06	18473
phylum	phylum.Firmicutes.id.1672	rs2545685	T	C	0.04655	0.01047	8.74e-06	18471
phylum	phylum.Firmicutes.id.1672	rs2591449	A	G	0.04657	0.01047	8.74e-06	18471
phylum	phylum.Firmicutes.id.1672	rs2545679	A	G	0.04641	0.01047	8.8e-06	18472
phylum	phylum.Firmicutes.id.1672	rs34075144	T	C	-0.06843	0.01572	8.81e-06	18473
phylum	phylum.Firmicutes.id.1672	rs1984783	G	A	-0.0684	0.01577	8.85e-06	18473
phylum	phylum.Firmicutes.id.1672	rs2662250	T	A	0.04642	0.01047	8.85e-06	18472
phylum	phylum.Firmicutes.id.1672	rs35393748	A	T	-0.0683	0.01572	9.09e-06	18473
phylum	phylum.Firmicutes.id.1672	rs4289208	C	T	0.08974	0.01798	9.6e-06	18472
phylum	phylum.Firmicutes.id.1672	rs2591445	G	A	0.04629	0.01047	9.61e-06	18472
phylum	phylum.Firmicutes.id.1672	rs13409228	A	G	0.09443	0.01871	9.64e-06	17992
phylum	phylum.Firmicutes.id.1672	rs7251887	T	C	-0.06912	0.01583	9.66e-06	18466
phylum	phylum.Firmicutes.id.1672	rs3931771	G	A	-0.06885	0.01571	9.75e-06	18469
phylum	phylum.Firmicutes.id.1672	rs11691634	T	G	0.0793	0.01796	9.76e-06	17947
phylum	phylum.Firmicutes.id.1672	rs34501267	G	A	-0.09308	0.02142	9.83e-06	17181
phylum	phylum.Firmicutes.id.1672	rs144715134	T	C	-0.06801	0.01572	9.89e-06	18473
phylum	phylum.Firmicutes.id.1672	rs8112095	A	G	-0.06869	0.0157	9.99e-06	18470
phylum	phylum.Lentisphaerae.id.2238	rs2825714	A	G	-0.13302	0.0285	2.42e-06	4851
phylum	phylum.Lentisphaerae.id.2238	rs11770843	C	T	0.10707	0.0232	2.44e-06	4821
phylum	phylum.Lentisphaerae.id.2238	rs77599476	A	G	0.22256	0.04747	3.58e-06	3838
phylum	phylum.Lentisphaerae.id.2238	rs112022900	A	G	0.2116	0.04564	4.97e-06	4208
phylum	phylum.Lentisphaerae.id.2238	rs62570196	C	T	-0.19879	0.04327	4.98e-06	3828
phylum	phylum.Lentisphaerae.id.2238	rs72640280	A	G	0.22019	0.04859	5.19e-06	3820
phylum	phylum.Lentisphaerae.id.2238	rs6951588	C	T	0.10516	0.02295	5.23e-06	4845
phylum	phylum.Lentisphaerae.id.2238	rs11764871	G	T	0.10568	0.02309	5.29e-06	4842
phylum	phylum.Lentisphaerae.id.2238	rs17114848	G	A	0.14885	0.03205	5.35e-06	4851
phylum	phylum.Lentisphaerae.id.2238	rs45621736	A	G	0.21029	0.04564	5.69e-06	4209
phylum	phylum.Lentisphaerae.id.2238	rs73194460	C	T	0.20894	0.04511	5.77e-06	3879
phylum	phylum.Lentisphaerae.id.2238	rs35004924	C	A	0.10303	0.02328	6.31e-06	4817
phylum	phylum.Lentisphaerae.id.2238	rs1002941	G	A	0.10409	0.02305	6.76e-06	4851
phylum	phylum.Lentisphaerae.id.2238	rs62481809	G	C	0.10388	0.02302	6.81e-06	4841
phylum	phylum.Lentisphaerae.id.2238	rs12516760	A	T	-0.11682	0.02612	7.67e-06	4769
phylum	phylum.Lentisphaerae.id.2238	rs17473575	T	C	-0.11643	0.02597	7.67e-06	4769
phylum	phylum.Lentisphaerae.id.2238	rs1024938	C	A	0.09524	0.02134	7.73e-06	4849
phylum	phylum.Lentisphaerae.id.2238	rs10515238	T	C	-0.11657	0.02612	8.25e-06	4768
phylum	phylum.Lentisphaerae.id.2238	rs2731834	C	G	0.10406	0.02336	8.37e-06	4850
phylum	phylum.Lentisphaerae.id.2238	rs60995569	T	G	-0.15953	0.03346	9.64e-06	4849
phylum	phylum.Lentisphaerae.id.2238	rs1326784	C	T	0.11165	0.02576	9.93e-06	4841
phylum	phylum.Proteobacteria.id.2375	rs922773	C	T	-0.0818	0.01573	2.06e-07	18265
phylum	phylum.Proteobacteria.id.2375	rs2532663	G	A	-0.12556	0.0257	6.79e-07	13146
phylum	phylum.Proteobacteria.id.2375	rs12150865	C	T	0.05128	0.0106	1.33e-06	17902
phylum	phylum.Proteobacteria.id.2375	rs12976403	A	G	0.05087	0.01063	1.79e-06	17902
phylum	phylum.Proteobacteria.id.2375	rs7246771	C	G	0.05042	0.0106	2.01e-06	17902
phylum	phylum.Proteobacteria.id.2375	rs10853762	A	T	0.05034	0.0106	2.08e-06	17902
phylum	phylum.Proteobacteria.id.2375	rs9797816	A	G	0.05024	0.0106	2.17e-06	17902
phylum	phylum.Proteobacteria.id.2375	rs7246428	T	G	0.04996	0.0106	2.47e-06	17902
phylum	phylum.Proteobacteria.id.2375	rs2347697	G	T	0.05117	0.01086	2.59e-06	18381
phylum	phylum.Proteobacteria.id.2375	rs4029163	C	A	0.04983	0.0106	2.6e-06	17902
phylum	phylum.Proteobacteria.id.2375	rs11083677	T	C	0.04984	0.0106	2.63e-06	17902
phylum	phylum.Proteobacteria.id.2375	rs11671245	C	T	0.04983	0.0106	2.63e-06	17902
phylum	phylum.Proteobacteria.id.2375	rs7246855	C	T	0.04982	0.0106	2.64e-06	17902
phylum	phylum.Proteobacteria.id.2375	rs2347698	G	A	0.05111	0.01086	2.65e-06	18383
phylum	phylum.Proteobacteria.id.2375	rs7249825	T	G	0.04974	0.0106	2.74e-06	17902
phylum	phylum.Proteobacteria.id.2375	rs7246141	C	G	0.04967	0.0106	2.83e-06	17902
phylum	phylum.Proteobacteria.id.2375	rs55717966	C	G	0.04962	0.0106	2.91e-06	17902
phylum	phylum.Proteobacteria.id.2375	rs2471952	T	C	0.04953	0.0106	2.97e-06	17902
phylum	phylum.Proteobacteria.id.2375	rs2347696	C	T	0.05087	0.01086	2.98e-06	18381
phylum	phylum.Proteobacteria.id.2375	rs6509051	G	A	0.04955	0.0106	2.98e-06	17902
phylum	phylum.Proteobacteria.id.2375	rs11666257	G	A	0.04975	0.01065	3.07e-06	17902
phylum	phylum.Proteobacteria.id.2375	rs2736151	T	C	0.0495	0.01061	3.08e-06	17902
phylum	phylum.Proteobacteria.id.2375	rs2526711	G	A	0.04945	0.0106	3.08e-06	17902
phylum	phylum.Proteobacteria.id.2375	rs7257768	G	A	0.04929	0.0106	3.36e-06	17902
phylum	phylum.Proteobacteria.id.2375	rs11881408	T	C	0.0493	0.0106	3.37e-06	17902
phylum	phylum.Proteobacteria.id.2375	rs12977541	C	T	0.04926	0.0106	3.4e-06	17902
phylum	phylum.Proteobacteria.id.2375	rs6467551	C	G	0.05103	0.01091	3.45e-06	18383
phylum	phylum.Proteobacteria.id.2375	rs11670025	G	T	0.04919	0.0106	3.52e-06	17902
phylum	phylum.Proteobacteria.id.2375	rs79445780	G	A	-0.11543	0.02524	3.56e-06	13983
phylum	phylum.Proteobacteria.id.2375	rs11083679	A	G	0.04909	0.0106	3.67e-06	17902
phylum	phylum.Proteobacteria.id.2375	rs4803563	G	A	0.04922	0.01064	3.85e-06	17902
phylum	phylum.Proteobacteria.id.2375	rs2526712	G	A	0.049	0.01061	3.87e-06	17902
phylum	phylum.Proteobacteria.id.2375	rs11083672	C	G	0.04928	0.01065	3.94e-06	17902
phylum	phylum.Proteobacteria.id.2375	rs10412444	T	C	0.04894	0.01061	3.97e-06	17902
phylum	phylum.Proteobacteria.id.2375	rs9789252	C	A	0.04888	0.01059	4.02e-06	17902
phylum	phylum.Proteobacteria.id.2375	rs12610565	A	G	0.0489	0.0106	4.02e-06	17902
phylum	phylum.Proteobacteria.id.2375	rs7246662	A	G	0.04881	0.0106	4.14e-06	17902
phylum	phylum.Proteobacteria.id.2375	rs11083681	T	G	0.0488	0.0106	4.16e-06	17902
phylum	phylum.Proteobacteria.id.2375	rs7248256	C	T	0.04878	0.0106	4.24e-06	17902
phylum	phylum.Proteobacteria.id.2375	rs4494654	T	C	0.04876	0.0106	4.27e-06	17902
phylum	phylum.Proteobacteria.id.2375	rs1058958	G	A	0.04865	0.0106	4.4e-06	17902
phylum	phylum.Proteobacteria.id.2375	rs2883539	C	G	0.0489	0.01064	4.42e-06	17902
phylum	phylum.Proteobacteria.id.2375	rs11667150	A	G	0.04869	0.0106	4.43e-06	17902
phylum	phylum.Proteobacteria.id.2375	rs6509049	G	T	0.04894	0.01064	4.46e-06	17902
phylum	phylum.Proteobacteria.id.2375	rs12610793	G	T	0.04861	0.0106	4.57e-06	17902
phylum	phylum.Proteobacteria.id.2375	rs2526716	G	A	0.04857	0.0106	4.59e-06	17902
phylum	phylum.Proteobacteria.id.2375	rs1989369	T	C	0.04841	0.01057	4.75e-06	17902
phylum	phylum.Proteobacteria.id.2375	rs7246092	C	T	0.04852	0.01061	4.79e-06	17902
phylum	phylum.Proteobacteria.id.2375	rs11668739	A	G	0.04875	0.01064	4.79e-06	17902
phylum	phylum.Proteobacteria.id.2375	rs7251480	C	A	0.04851	0.0106	4.79e-06	17902
phylum	phylum.Proteobacteria.id.2375	rs7255373	T	A	0.04886	0.01065	4.81e-06	17902
phylum	phylum.Proteobacteria.id.2375	rs1860455	G	T	0.04849	0.01059	4.83e-06	17902
phylum	phylum.Proteobacteria.id.2375	rs8106280	A	G	0.04871	0.01064	4.86e-06	17902
phylum	phylum.Proteobacteria.id.2375	rs6509053	T	A	0.04847	0.0106	4.89e-06	17902
phylum	phylum.Proteobacteria.id.2375	rs8102971	T	C	0.04868	0.01064	4.93e-06	17902
phylum	phylum.Proteobacteria.id.2375	rs11670071	A	G	0.04842	0.0106	5.04e-06	17902
phylum	phylum.Proteobacteria.id.2375	rs11083680	T	C	0.04838	0.0106	5.09e-06	17902
phylum	phylum.Proteobacteria.id.2375	rs10775540	G	A	0.04836	0.0106	5.11e-06	17902
phylum	phylum.Proteobacteria.id.2375	rs312757	C	G	-0.05128	0.01124	5.28e-06	18383
phylum	phylum.Proteobacteria.id.2375	rs11083683	T	A	0.04823	0.0106	5.39e-06	17902
phylum	phylum.Proteobacteria.id.2375	rs2526706	A	G	0.04814	0.0106	5.59e-06	17902
phylum	phylum.Proteobacteria.id.2375	rs2526715	T	A	0.0481	0.0106	5.68e-06	17902
phylum	phylum.Proteobacteria.id.2375	rs12467198	C	T	0.04988	0.0111	5.7e-06	18371
phylum	phylum.Proteobacteria.id.2375	rs4803564	C	G	0.04813	0.01063	5.92e-06	17788
phylum	phylum.Proteobacteria.id.2375	rs8105730	C	T	0.0484	0.01066	5.97e-06	17902
phylum	phylum.Proteobacteria.id.2375	rs8103079	A	G	0.04823	0.01064	6.06e-06	17902
phylum	phylum.Proteobacteria.id.2375	rs10775538	A	C	0.04798	0.01061	6.1e-06	17902
phylum	phylum.Proteobacteria.id.2375	rs8102759	G	C	0.0482	0.01064	6.11e-06	17902
phylum	phylum.Proteobacteria.id.2375	rs1036607	T	C	0.04981	0.01109	6.2e-06	18382
phylum	phylum.Proteobacteria.id.2375	rs1962504	C	G	0.04791	0.0106	6.22e-06	17902
phylum	phylum.Proteobacteria.id.2375	rs8103457	A	T	0.04826	0.01065	6.23e-06	17902
phylum	phylum.Proteobacteria.id.2375	rs1989371	A	C	0.04781	0.01058	6.29e-06	17902
phylum	phylum.Proteobacteria.id.2375	rs4029165	G	A	0.04789	0.0106	6.3e-06	17902
phylum	phylum.Proteobacteria.id.2375	rs10750258	A	C	-0.04969	0.01078	6.32e-06	18383
phylum	phylum.Proteobacteria.id.2375	rs1962505	T	G	0.04786	0.0106	6.39e-06	17902
phylum	phylum.Proteobacteria.id.2375	rs11083676	A	G	0.04785	0.01061	6.43e-06	17902
phylum	phylum.Proteobacteria.id.2375	rs6509052	A	T	0.04785	0.0106	6.43e-06	17902
phylum	phylum.Proteobacteria.id.2375	rs11668675	G	A	0.04778	0.0106	6.71e-06	17902
phylum	phylum.Proteobacteria.id.2375	rs6707783	C	T	0.08524	0.01869	6.87e-06	17457
phylum	phylum.Proteobacteria.id.2375	rs1439134	C	T	0.04949	0.0111	6.93e-06	18371
phylum	phylum.Proteobacteria.id.2375	rs141155	C	A	-0.05042	0.01124	7.12e-06	18383
phylum	phylum.Proteobacteria.id.2375	rs7246972	C	T	0.048	0.01065	7.18e-06	17902
phylum	phylum.Proteobacteria.id.2375	rs72771021	C	T	0.14173	0.03092	7.19e-06	9009
phylum	phylum.Proteobacteria.id.2375	rs7255021	A	G	0.04762	0.01061	7.26e-06	17902
phylum	phylum.Proteobacteria.id.2375	rs11673614	T	G	0.04758	0.0106	7.28e-06	17902
phylum	phylum.Proteobacteria.id.2375	rs11668790	G	C	0.04755	0.0106	7.4e-06	17902
phylum	phylum.Proteobacteria.id.2375	rs10893151	A	G	-0.04933	0.01077	7.68e-06	18382
phylum	phylum.Proteobacteria.id.2375	rs11083675	T	C	0.04726	0.01061	8.37e-06	17902
phylum	phylum.Proteobacteria.id.2375	rs4340523	C	T	0.04903	0.0111	8.45e-06	18371
phylum	phylum.Proteobacteria.id.2375	rs3890996	T	G	-0.04679	0.01053	8.64e-06	18253
phylum	phylum.Proteobacteria.id.2375	rs6944563	T	C	0.04897	0.01093	8.67e-06	18374
phylum	phylum.Proteobacteria.id.2375	rs10853761	T	C	0.04716	0.01061	8.78e-06	17902
phylum	phylum.Proteobacteria.id.2375	rs4803561	A	C	0.04736	0.01066	9.33e-06	17902
phylum	phylum.Proteobacteria.id.2375	rs12981150	A	G	0.04741	0.01065	9.4e-06	17902
phylum	phylum.Tenericutes.id.3919	rs74603314	T	C	0.22164	0.04629	1.56e-06	4499
phylum	phylum.Tenericutes.id.3919	rs6867857	A	C	0.12341	0.02678	1.69e-06	10482
phylum	phylum.Tenericutes.id.3919	rs10108398	G	A	0.07475	0.01533	1.95e-06	11023
phylum	phylum.Tenericutes.id.3919	rs67374027	A	T	0.07244	0.01541	2.05e-06	11480
phylum	phylum.Tenericutes.id.3919	rs11890098	A	G	0.07135	0.01527	2.22e-06	11483
phylum	phylum.Tenericutes.id.3919	rs72901605	T	C	-0.08511	0.01775	2.27e-06	10617
phylum	phylum.Tenericutes.id.3919	rs10111506	T	A	0.06668	0.01418	3.34e-06	11483
phylum	phylum.Tenericutes.id.3919	rs1583268	A	G	0.07014	0.01528	3.34e-06	11481
phylum	phylum.Tenericutes.id.3919	rs3768491	A	G	-0.06856	0.01485	3.34e-06	11093
phylum	phylum.Tenericutes.id.3919	rs638542	G	A	-0.06862	0.0149	3.39e-06	11090
phylum	phylum.Tenericutes.id.3919	rs17214486	C	A	0.06252	0.01351	3.57e-06	11478
phylum	phylum.Tenericutes.id.3919	rs12566890	T	G	-0.10079	0.023	3.59e-06	11462
phylum	phylum.Tenericutes.id.3919	rs12711448	C	T	-0.06832	0.01485	3.59e-06	11093
phylum	phylum.Tenericutes.id.3919	rs12674568	G	A	0.06645	0.0142	3.72e-06	11483
phylum	phylum.Tenericutes.id.3919	rs4325706	T	C	0.06959	0.01528	3.92e-06	11483
phylum	phylum.Tenericutes.id.3919	rs12680996	C	T	0.06616	0.01418	3.97e-06	11483
phylum	phylum.Tenericutes.id.3919	rs16923562	G	A	0.06614	0.01418	3.97e-06	11483
phylum	phylum.Tenericutes.id.3919	rs78169027	A	G	-0.10966	0.02364	4.02e-06	10633
phylum	phylum.Tenericutes.id.3919	rs10102709	T	C	0.06622	0.0142	4.03e-06	11483
phylum	phylum.Tenericutes.id.3919	rs16923564	C	T	0.06604	0.01418	4.11e-06	11483
phylum	phylum.Tenericutes.id.3919	rs4970749	G	A	-0.06792	0.01485	4.11e-06	11093
phylum	phylum.Tenericutes.id.3919	rs652651	A	G	-0.06795	0.0149	4.16e-06	11092
phylum	phylum.Tenericutes.id.3919	rs11776003	A	G	0.06598	0.01418	4.2e-06	11483
phylum	phylum.Tenericutes.id.3919	rs1991359	G	A	0.06588	0.01418	4.36e-06	11483
phylum	phylum.Tenericutes.id.3919	rs28650441	C	A	0.06589	0.01419	4.39e-06	11483
phylum	phylum.Tenericutes.id.3919	rs6471729	A	G	0.06571	0.01418	4.57e-06	11483
phylum	phylum.Tenericutes.id.3919	rs3931560	A	C	-0.06762	0.01485	4.57e-06	11093
phylum	phylum.Tenericutes.id.3919	rs7817515	G	T	0.06565	0.01418	4.67e-06	11483
phylum	phylum.Tenericutes.id.3919	rs7009248	G	A	0.0657	0.01418	4.71e-06	11483
phylum	phylum.Tenericutes.id.3919	rs11102971	C	T	-0.06744	0.01485	4.8e-06	11093
phylum	phylum.Tenericutes.id.3919	rs4970840	A	G	-0.06798	0.0149	4.81e-06	11093
phylum	phylum.Tenericutes.id.3919	rs28429491	T	C	0.06549	0.01418	4.93e-06	11483
phylum	phylum.Tenericutes.id.3919	rs4970754	A	G	-0.06718	0.01482	5.04e-06	11093
phylum	phylum.Tenericutes.id.3919	rs10745352	T	C	-0.06732	0.01485	5.04e-06	11093
phylum	phylum.Tenericutes.id.3919	rs7590919	A	G	0.06881	0.01528	5.11e-06	11478
phylum	phylum.Tenericutes.id.3919	rs13024040	T	C	0.07023	0.01561	5.27e-06	11465
phylum	phylum.Tenericutes.id.3919	rs6664236	C	A	-0.06702	0.01482	5.32e-06	11085
phylum	phylum.Tenericutes.id.3919	rs12586623	A	T	0.06124	0.01347	5.36e-06	11481
phylum	phylum.Tenericutes.id.3919	rs13025440	G	T	0.07147	0.01582	5.39e-06	11465
phylum	phylum.Tenericutes.id.3919	rs55774738	C	T	0.06494	0.01415	5.57e-06	11482
phylum	phylum.Tenericutes.id.3919	rs7825996	T	A	0.06565	0.01429	5.74e-06	11481
phylum	phylum.Tenericutes.id.3919	rs7014398	T	C	0.06511	0.0142	5.8e-06	11483
phylum	phylum.Tenericutes.id.3919	rs1583269	G	C	0.06845	0.01532	5.92e-06	11481
phylum	phylum.Tenericutes.id.3919	rs10858095	G	C	-0.06682	0.01486	5.94e-06	11093
phylum	phylum.Tenericutes.id.3919	rs72647435	T	G	0.0655	0.01429	6.1e-06	11481
phylum	phylum.Tenericutes.id.3919	rs6695482	C	G	-0.06671	0.01485	6.14e-06	11093
phylum	phylum.Tenericutes.id.3919	rs10099153	G	C	0.06541	0.01429	6.19e-06	11480
phylum	phylum.Tenericutes.id.3919	rs13027493	A	T	0.06817	0.01528	6.23e-06	11482
phylum	phylum.Tenericutes.id.3919	rs9297995	T	C	0.06456	0.01415	6.34e-06	11482
phylum	phylum.Tenericutes.id.3919	rs10113750	T	C	0.06464	0.01417	6.43e-06	11483
phylum	phylum.Tenericutes.id.3919	rs7551176	C	T	-0.0671	0.01489	6.44e-06	11093
phylum	phylum.Tenericutes.id.3919	rs10858094	T	C	-0.06634	0.01485	6.69e-06	11093
phylum	phylum.Tenericutes.id.3919	rs12335008	A	T	0.06519	0.01429	6.78e-06	11481
phylum	phylum.Tenericutes.id.3919	rs10745356	C	A	-0.06695	0.0149	6.78e-06	11093
phylum	phylum.Tenericutes.id.3919	rs1465607	T	C	-0.06695	0.01489	6.79e-06	11093
phylum	phylum.Tenericutes.id.3919	rs4885016	T	C	-0.08196	0.01811	6.8e-06	11479
phylum	phylum.Tenericutes.id.3919	rs12711447	C	T	-0.0669	0.0149	6.89e-06	11093
phylum	phylum.Tenericutes.id.3919	rs7009374	T	C	0.06433	0.01415	6.89e-06	11482
phylum	phylum.Tenericutes.id.3919	rs10099912	T	G	0.0651	0.01429	6.9e-06	11481
phylum	phylum.Tenericutes.id.3919	rs417270	T	C	-0.06634	0.01486	7.08e-06	11091
phylum	phylum.Tenericutes.id.3919	rs10090964	T	A	0.06426	0.01415	7.14e-06	11482
phylum	phylum.Tenericutes.id.3919	rs10776807	G	A	-0.06622	0.01486	7.22e-06	11093
phylum	phylum.Tenericutes.id.3919	rs367586	C	A	-0.06628	0.01486	7.22e-06	11091
phylum	phylum.Tenericutes.id.3919	rs7011095	A	T	0.06488	0.01429	7.46e-06	11481
phylum	phylum.Tenericutes.id.3919	rs443345	A	G	-0.06615	0.01486	7.51e-06	11091
phylum	phylum.Tenericutes.id.3919	rs59979442	G	A	0.06482	0.01429	7.52e-06	11481
phylum	phylum.Tenericutes.id.3919	rs28537087	G	A	0.08206	0.01876	7.56e-06	11473
phylum	phylum.Tenericutes.id.3919	rs12136140	G	A	-0.066	0.01485	7.64e-06	11091
phylum	phylum.Tenericutes.id.3919	rs12676593	G	A	0.06478	0.01429	7.65e-06	11481
phylum	phylum.Tenericutes.id.3919	rs10094910	C	T	0.06415	0.01417	7.65e-06	11481
phylum	phylum.Tenericutes.id.3919	rs10858092	C	T	-0.06584	0.01485	7.74e-06	11093
phylum	phylum.Tenericutes.id.3919	rs11102969	G	A	-0.06594	0.01485	7.78e-06	11093
phylum	phylum.Tenericutes.id.3919	rs13015145	A	G	0.0674	0.01529	7.85e-06	11483
phylum	phylum.Tenericutes.id.3919	rs28809811	T	G	0.06558	0.01447	7.93e-06	11476
phylum	phylum.Tenericutes.id.3919	rs933571	A	G	-0.06289	0.01411	8e-06	11023
phylum	phylum.Tenericutes.id.3919	rs12024582	G	A	-0.06639	0.0149	8.06e-06	11093
phylum	phylum.Tenericutes.id.3919	rs10484208	G	T	0.0601	0.01347	8.17e-06	11480
phylum	phylum.Tenericutes.id.3919	rs10745353	A	G	-0.0666	0.01493	8.27e-06	11093
phylum	phylum.Tenericutes.id.3919	rs10858091	T	C	-0.06562	0.01485	8.35e-06	11093
phylum	phylum.Tenericutes.id.3919	rs3768493	C	T	-0.06562	0.01485	8.35e-06	11093
phylum	phylum.Tenericutes.id.3919	rs13020096	C	T	0.06244	0.01411	8.36e-06	11483
phylum	phylum.Tenericutes.id.3919	rs1343465	T	C	-0.0656	0.01485	8.4e-06	11093
phylum	phylum.Tenericutes.id.3919	rs145331405	A	C	0.08007	0.0183	8.52e-06	11463
phylum	phylum.Tenericutes.id.3919	rs6981601	T	C	0.06363	0.01415	8.53e-06	11482
phylum	phylum.Tenericutes.id.3919	rs4970729	G	A	-0.06545	0.01479	8.54e-06	11085
phylum	phylum.Tenericutes.id.3919	rs2147012	G	A	0.0612	0.01376	8.56e-06	11483
phylum	phylum.Tenericutes.id.3919	rs11678196	G	A	0.06235	0.01411	8.58e-06	11483
phylum	phylum.Tenericutes.id.3919	rs3768495	C	T	-0.0655	0.01485	8.68e-06	11093
phylum	phylum.Tenericutes.id.3919	rs6986129	T	A	0.06354	0.01415	8.82e-06	11482
phylum	phylum.Tenericutes.id.3919	rs79878701	A	G	0.08511	0.01934	9.01e-06	11456
phylum	phylum.Tenericutes.id.3919	rs3739327	A	G	0.06414	0.01436	9.05e-06	11023
phylum	phylum.Tenericutes.id.3919	rs2464826	A	C	0.09374	0.0211	9.11e-06	11089
phylum	phylum.Tenericutes.id.3919	rs9673327	A	G	-0.06066	0.01365	9.33e-06	11023
phylum	phylum.Tenericutes.id.3919	rs11783174	T	G	0.06417	0.01429	9.41e-06	11481
phylum	phylum.Tenericutes.id.3919	rs12476593	G	C	0.06967	0.01586	9.57e-06	11462
phylum	phylum.Tenericutes.id.3919	rs3853500	T	C	-0.06523	0.01486	9.74e-06	11091
phylum	phylum.Tenericutes.id.3919	rs62188991	G	C	-0.10188	0.02283	9.74e-06	10617
phylum	phylum.Tenericutes.id.3919	rs10111052	G	T	0.06337	0.01417	9.91e-06	11481
phylum	phylum.Tenericutes.id.3919	rs1880670	C	T	-0.06503	0.01485	9.93e-06	11093
phylum	phylum.Tenericutes.id.3919	rs3853501	G	A	-0.06517	0.01486	9.94e-06	11091
phylum	phylum.Verrucomicrobia.id.3982	rs74542928	T	C	0.11287	0.02299	6.91e-07	11836
phylum	phylum.Verrucomicrobia.id.3982	rs11252894	A	C	0.07933	0.01618	7.26e-07	12514
phylum	phylum.Verrucomicrobia.id.3982	rs112769434	G	A	0.1121	0.02299	8.8e-07	11836
phylum	phylum.Verrucomicrobia.id.3982	rs12416161	T	C	0.07817	0.01614	8.98e-07	12514
phylum	phylum.Verrucomicrobia.id.3982	rs1491244	T	A	0.11161	0.02298	1e-06	11836
phylum	phylum.Verrucomicrobia.id.3982	rs2602429	C	T	0.07568	0.01528	1.03e-06	12237
phylum	phylum.Verrucomicrobia.id.3982	rs6832119	G	A	0.11047	0.02299	1.35e-06	11836
phylum	phylum.Verrucomicrobia.id.3982	rs111311092	T	A	0.10964	0.02296	1.58e-06	11836
phylum	phylum.Verrucomicrobia.id.3982	rs11729256	T	C	0.07023	0.01463	1.65e-06	12510
phylum	phylum.Verrucomicrobia.id.3982	rs113653192	T	C	0.10957	0.02299	1.68e-06	11836
phylum	phylum.Verrucomicrobia.id.3982	rs6832927	A	C	0.1095	0.02299	1.71e-06	11836
phylum	phylum.Verrucomicrobia.id.3982	rs7693865	T	C	0.10941	0.02299	1.77e-06	11837
phylum	phylum.Verrucomicrobia.id.3982	rs76564762	T	C	0.10851	0.02297	1.99e-06	11836
phylum	phylum.Verrucomicrobia.id.3982	rs6837699	A	G	0.10863	0.02296	1.99e-06	11836
phylum	phylum.Verrucomicrobia.id.3982	rs2903202	T	A	0.09756	0.02028	2.12e-06	12223
phylum	phylum.Verrucomicrobia.id.3982	rs4242783	G	A	0.06798	0.01443	2.14e-06	12237
phylum	phylum.Verrucomicrobia.id.3982	rs17533489	C	T	0.09755	0.02034	2.17e-06	12223
phylum	phylum.Verrucomicrobia.id.3982	rs45598138	C	A	-0.1439	0.03054	2.19e-06	9932
phylum	phylum.Verrucomicrobia.id.3982	rs79837054	C	T	0.10833	0.023	2.23e-06	11837
phylum	phylum.Verrucomicrobia.id.3982	rs79606973	A	T	0.09721	0.02034	2.31e-06	12223
phylum	phylum.Verrucomicrobia.id.3982	rs12411321	C	T	0.07512	0.01618	2.44e-06	12516
phylum	phylum.Verrucomicrobia.id.3982	rs111303866	A	C	0.1074	0.02298	2.52e-06	11836
phylum	phylum.Verrucomicrobia.id.3982	rs112707021	A	G	0.1074	0.02298	2.52e-06	11836
phylum	phylum.Verrucomicrobia.id.3982	rs112812594	A	G	0.10701	0.02277	2.65e-06	11836
phylum	phylum.Verrucomicrobia.id.3982	rs113634144	T	G	0.06901	0.01462	2.66e-06	12508
phylum	phylum.Verrucomicrobia.id.3982	rs79194015	T	A	0.09665	0.02034	2.68e-06	12223
phylum	phylum.Verrucomicrobia.id.3982	rs61779207	G	A	-0.07727	0.01634	2.83e-06	12220
phylum	phylum.Verrucomicrobia.id.3982	rs76430504	T	C	-0.11781	0.02541	3.12e-06	11757
phylum	phylum.Verrucomicrobia.id.3982	rs2035814	G	A	0.09578	0.02034	3.14e-06	12223
phylum	phylum.Verrucomicrobia.id.3982	rs76819189	T	C	0.09566	0.02034	3.25e-06	12223
phylum	phylum.Verrucomicrobia.id.3982	rs111441437	A	T	0.09546	0.02034	3.47e-06	12223
phylum	phylum.Verrucomicrobia.id.3982	rs113911713	C	T	0.09518	0.02034	3.65e-06	12223
phylum	phylum.Verrucomicrobia.id.3982	rs112520120	C	T	0.09509	0.02034	3.67e-06	12223
phylum	phylum.Verrucomicrobia.id.3982	rs76877520	A	G	0.09508	0.02034	3.69e-06	12223
phylum	phylum.Verrucomicrobia.id.3982	rs7698547	T	C	0.09484	0.02034	3.93e-06	12223
phylum	phylum.Verrucomicrobia.id.3982	rs75487972	C	T	0.09457	0.02034	4.04e-06	12223
phylum	phylum.Verrucomicrobia.id.3982	rs10516447	G	A	0.10446	0.02284	4.05e-06	11837
phylum	phylum.Verrucomicrobia.id.3982	rs6532823	A	C	0.09458	0.02034	4.14e-06	12223
phylum	phylum.Verrucomicrobia.id.3982	rs74399905	A	T	0.10421	0.02284	4.23e-06	11837
phylum	phylum.Verrucomicrobia.id.3982	rs41275715	T	C	0.09427	0.02034	4.31e-06	12223
phylum	phylum.Verrucomicrobia.id.3982	rs9349825	A	G	-0.06678	0.01431	4.34e-06	12506
phylum	phylum.Verrucomicrobia.id.3982	rs2035815	C	T	0.09453	0.0203	4.37e-06	12223
phylum	phylum.Verrucomicrobia.id.3982	rs745075	C	T	0.0942	0.02034	4.4e-06	12223
phylum	phylum.Verrucomicrobia.id.3982	rs6842339	G	T	0.10435	0.02284	4.4e-06	11837
phylum	phylum.Verrucomicrobia.id.3982	rs112048442	A	G	0.10433	0.02284	4.43e-06	11834
phylum	phylum.Verrucomicrobia.id.3982	rs11252899	A	G	0.07482	0.01648	4.45e-06	12433
phylum	phylum.Verrucomicrobia.id.3982	rs117107102	A	G	0.19587	0.04211	4.6e-06	5204
phylum	phylum.Verrucomicrobia.id.3982	rs736124	A	T	-0.07503	0.01634	4.61e-06	12223
phylum	phylum.Verrucomicrobia.id.3982	rs745074	A	T	0.094	0.02034	4.64e-06	12223
phylum	phylum.Verrucomicrobia.id.3982	rs61779206	T	C	-0.07527	0.01628	4.66e-06	12221
phylum	phylum.Verrucomicrobia.id.3982	rs1491246	T	A	0.09378	0.02034	4.87e-06	12223
phylum	phylum.Verrucomicrobia.id.3982	rs112108820	T	C	0.09379	0.0202	4.89e-06	12219
phylum	phylum.Verrucomicrobia.id.3982	rs1491237	G	A	0.09382	0.02034	5.01e-06	12223
phylum	phylum.Verrucomicrobia.id.3982	rs2895059	T	C	0.07285	0.01618	5.05e-06	12516
phylum	phylum.Verrucomicrobia.id.3982	rs111664214	T	C	0.09343	0.0203	5.13e-06	12222
phylum	phylum.Verrucomicrobia.id.3982	rs17533517	T	C	0.09365	0.02034	5.2e-06	12223
phylum	phylum.Verrucomicrobia.id.3982	rs1491245	G	T	0.09329	0.02034	5.48e-06	12223
phylum	phylum.Verrucomicrobia.id.3982	rs3995795	C	T	0.06239	0.01378	5.59e-06	12237
phylum	phylum.Verrucomicrobia.id.3982	rs114505328	A	T	0.09306	0.02023	5.89e-06	12223
phylum	phylum.Verrucomicrobia.id.3982	rs2169719	G	A	0.06389	0.01416	6.12e-06	12506
phylum	phylum.Verrucomicrobia.id.3982	rs17533020	G	A	0.09311	0.02029	6.14e-06	12223
phylum	phylum.Verrucomicrobia.id.3982	rs56326809	G	C	-0.07384	0.01632	6.37e-06	12223
phylum	phylum.Verrucomicrobia.id.3982	rs1937881	T	C	0.07183	0.01618	6.73e-06	12515
phylum	phylum.Verrucomicrobia.id.3982	rs77055143	T	C	0.06326	0.01411	6.74e-06	12516
phylum	phylum.Verrucomicrobia.id.3982	rs76826818	G	A	0.09252	0.02034	6.81e-06	12223
phylum	phylum.Verrucomicrobia.id.3982	rs56161035	T	C	0.06318	0.01408	6.91e-06	12515
phylum	phylum.Verrucomicrobia.id.3982	rs7668586	T	C	0.09233	0.02034	7.14e-06	12223
phylum	phylum.Verrucomicrobia.id.3982	rs79293902	T	C	0.10175	0.02284	7.49e-06	11837
phylum	phylum.Verrucomicrobia.id.3982	rs6844547	T	C	0.10154	0.02284	7.53e-06	11837
phylum	phylum.Verrucomicrobia.id.3982	rs6845301	A	G	0.10144	0.02284	7.76e-06	11837
phylum	phylum.Verrucomicrobia.id.3982	rs12908520	G	A	0.05657	0.01275	8.81e-06	12513
phylum	phylum.Verrucomicrobia.id.3982	rs12498518	T	C	0.06208	0.01411	9.81e-06	12516
phylum	phylum.Verrucomicrobia.id.3982	rs12512971	A	C	0.17105	0.0398	9.82e-06	3919
class	class.Actinobacteria.id.419	rs182549	C	T	0.11163	0.01202	2.45e-20	16446
class	class.Actinobacteria.id.419	rs4988235	G	A	0.10931	0.01201	1.36e-19	16446
class	class.Actinobacteria.id.419	rs6754311	C	T	0.10838	0.012	2.41e-19	16445
class	class.Actinobacteria.id.419	rs6730157	G	A	0.10646	0.01186	4e-19	16446
class	class.Actinobacteria.id.419	rs1446585	G	A	0.10884	0.0121	5.13e-19	16315
class	class.Actinobacteria.id.419	rs7570971	A	C	0.10521	0.01188	6.5e-19	16315
class	class.Actinobacteria.id.419	rs36084664	G	A	-0.10853	0.01283	7.57e-19	15425
class	class.Actinobacteria.id.419	rs12465802	A	G	0.10598	0.01195	8.4e-19	16446
class	class.Actinobacteria.id.419	rs1375131	C	T	0.1046	0.01186	1.52e-18	16445
class	class.Actinobacteria.id.419	rs687670	C	T	0.10595	0.01226	1.42e-17	16446
class	class.Actinobacteria.id.419	rs13023281	C	T	-0.10244	0.01274	3.09e-17	15425
class	class.Actinobacteria.id.419	rs13404551	C	T	0.10455	0.01225	4.86e-17	16444
class	class.Actinobacteria.id.419	rs309160	T	C	0.10267	0.01226	1.7e-16	16446
class	class.Actinobacteria.id.419	rs309134	A	G	0.10412	0.01245	2.06e-16	16445
class	class.Actinobacteria.id.419	rs309168	T	C	0.10211	0.01227	2.51e-16	16446
class	class.Actinobacteria.id.419	rs218174	G	A	0.10198	0.01227	3.3e-16	16445
class	class.Actinobacteria.id.419	rs6759321	T	G	0.09868	0.01205	6e-16	16315
class	class.Actinobacteria.id.419	rs309180	G	A	0.10095	0.01228	6.12e-16	16446
class	class.Actinobacteria.id.419	rs12615624	G	A	0.10206	0.01245	8.25e-16	16446
class	class.Actinobacteria.id.419	rs632632	C	T	0.09996	0.01227	1.23e-15	16445
class	class.Actinobacteria.id.419	rs1561277	A	C	0.09696	0.01203	1.87e-15	16315
class	class.Actinobacteria.id.419	rs309125	T	C	0.09915	0.01227	1.95e-15	16445
class	class.Actinobacteria.id.419	rs309164	C	T	0.10037	0.01245	2.31e-15	16446
class	class.Actinobacteria.id.419	rs4988183	C	T	0.10047	0.01254	3.9e-15	16445
class	class.Actinobacteria.id.419	rs309149	T	C	0.09863	0.01245	6.73e-15	16446
class	class.Actinobacteria.id.419	rs309137	C	T	0.09608	0.01224	1.12e-14	16446
class	class.Actinobacteria.id.419	rs4954490	G	A	0.09637	0.01235	1.9e-14	16441
class	class.Actinobacteria.id.419	rs6716536	T	C	0.09339	0.01207	2.1e-14	16315
class	class.Actinobacteria.id.419	rs2236783	G	A	0.09637	0.01237	2.32e-14	16446
class	class.Actinobacteria.id.419	rs12620033	C	G	0.09596	0.01237	2.93e-14	16446
class	class.Actinobacteria.id.419	rs11681248	C	T	0.08901	0.01179	8.78e-14	16441
class	class.Actinobacteria.id.419	rs3754686	T	C	0.0936	0.01235	9.71e-14	16446
class	class.Actinobacteria.id.419	rs745500	G	A	0.09335	0.01236	1.32e-13	16446
class	class.Actinobacteria.id.419	rs3739020	G	T	0.09529	0.01264	1.42e-13	16443
class	class.Actinobacteria.id.419	rs6742283	A	G	0.09293	0.01237	1.61e-13	16443
class	class.Actinobacteria.id.419	rs6719488	G	T	0.09284	0.01236	1.76e-13	16446
class	class.Actinobacteria.id.419	rs892715	T	C	0.09276	0.01236	1.83e-13	16446
class	class.Actinobacteria.id.419	rs3769005	C	G	0.09235	0.01235	1.95e-13	16446
class	class.Actinobacteria.id.419	rs2322660	C	T	0.09255	0.01235	1.96e-13	16446
class	class.Actinobacteria.id.419	rs12988076	C	A	0.09248	0.01236	2.21e-13	16446
class	class.Actinobacteria.id.419	rs2322659	T	C	0.09424	0.01261	2.22e-13	16446
class	class.Actinobacteria.id.419	rs748841	C	T	0.09231	0.01235	2.3e-13	16446
class	class.Actinobacteria.id.419	rs1470457	G	A	0.09395	0.01263	3.26e-13	16446
class	class.Actinobacteria.id.419	rs12475139	A	T	0.08946	0.01221	4.65e-13	16315
class	class.Actinobacteria.id.419	rs2164210	T	C	0.09071	0.01236	5.65e-13	16446
class	class.Actinobacteria.id.419	rs17261772	C	T	0.09126	0.01244	5.86e-13	16315
class	class.Actinobacteria.id.419	rs313519	C	A	0.09118	0.01254	7.23e-13	16446
class	class.Actinobacteria.id.419	rs313518	T	C	0.09105	0.01254	8.26e-13	16446
class	class.Actinobacteria.id.419	rs749873	C	T	0.08528	0.01181	9.72e-13	16446
class	class.Actinobacteria.id.419	rs10928546	C	T	0.09135	0.01258	9.95e-13	16446
class	class.Actinobacteria.id.419	rs71348714	G	A	0.09019	0.01254	1.32e-12	16446
class	class.Actinobacteria.id.419	rs313517	G	A	0.09018	0.01254	1.34e-12	16446
class	class.Actinobacteria.id.419	rs2082729	C	T	0.09099	0.01259	1.35e-12	16446
class	class.Actinobacteria.id.419	rs71348715	G	T	0.09088	0.01259	1.36e-12	16446
class	class.Actinobacteria.id.419	rs11684545	G	T	0.09075	0.01259	1.37e-12	16446
class	class.Actinobacteria.id.419	rs313526	T	C	0.09004	0.01253	1.46e-12	16446
class	class.Actinobacteria.id.419	rs2034276	T	A	0.08992	0.01253	1.5e-12	16446
class	class.Actinobacteria.id.419	rs313528	A	G	0.08997	0.01253	1.5e-12	16446
class	class.Actinobacteria.id.419	rs4954280	G	A	0.08992	0.01253	1.54e-12	16446
class	class.Actinobacteria.id.419	rs28453840	G	A	0.0905	0.01258	1.57e-12	16445
class	class.Actinobacteria.id.419	rs1446584	G	A	0.08973	0.01253	1.68e-12	16446
class	class.Actinobacteria.id.419	rs313523	A	G	0.08972	0.01254	1.71e-12	16446
class	class.Actinobacteria.id.419	rs313522	A	T	0.08968	0.01254	1.76e-12	16446
class	class.Actinobacteria.id.419	rs1438305	C	G	0.09037	0.01259	1.83e-12	16446
class	class.Actinobacteria.id.419	rs1011361	G	A	0.0903	0.01259	1.9e-12	16445
class	class.Actinobacteria.id.419	rs10202489	G	A	0.09002	0.01256	1.99e-12	16446
class	class.Actinobacteria.id.419	rs656326	C	A	0.08938	0.01254	2.07e-12	16446
class	class.Actinobacteria.id.419	rs6720287	G	A	0.08933	0.01253	2.07e-12	16446
class	class.Actinobacteria.id.419	rs313524	T	C	0.08932	0.01253	2.15e-12	16446
class	class.Actinobacteria.id.419	rs12998016	C	T	0.09	0.01259	2.23e-12	16445
class	class.Actinobacteria.id.419	rs6715856	C	T	0.08912	0.01253	2.29e-12	16446
class	class.Actinobacteria.id.419	rs6430589	G	C	0.08961	0.01259	2.3e-12	16445
class	class.Actinobacteria.id.419	rs1438307	G	T	0.08985	0.01258	2.32e-12	16446
class	class.Actinobacteria.id.419	rs1438304	A	G	0.08995	0.01259	2.33e-12	16446
class	class.Actinobacteria.id.419	rs6755383	T	C	0.08908	0.01253	2.35e-12	16446
class	class.Actinobacteria.id.419	rs10195620	A	T	0.08987	0.01259	2.35e-12	16446
class	class.Actinobacteria.id.419	rs7355359	C	T	0.08903	0.01254	2.57e-12	16446
class	class.Actinobacteria.id.419	rs10192827	G	A	0.08977	0.01258	2.67e-12	16444
class	class.Actinobacteria.id.419	rs10928542	A	G	0.08865	0.01253	2.99e-12	16446
class	class.Actinobacteria.id.419	rs12998387	A	G	0.08939	0.01258	3.05e-12	16446
class	class.Actinobacteria.id.419	rs3213889	A	G	0.08951	0.01259	3.05e-12	16446
class	class.Actinobacteria.id.419	rs4954276	G	A	0.08885	0.01253	3.11e-12	16446
class	class.Actinobacteria.id.419	rs7608045	C	T	0.0886	0.01253	3.12e-12	16446
class	class.Actinobacteria.id.419	rs10173394	C	T	0.08936	0.01258	3.16e-12	16446
class	class.Actinobacteria.id.419	rs13412397	G	A	0.08898	0.01255	3.27e-12	16446
class	class.Actinobacteria.id.419	rs4954279	A	G	0.08842	0.01253	3.42e-12	16446
class	class.Actinobacteria.id.419	rs12619365	T	C	0.08856	0.01258	3.44e-12	16446
class	class.Actinobacteria.id.419	rs2011946	C	A	0.0839	0.0119	3.8e-12	16441
class	class.Actinobacteria.id.419	rs11679508	A	T	0.08855	0.01255	4.17e-12	16446
class	class.Actinobacteria.id.419	rs12994270	T	A	0.08893	0.01258	4.24e-12	16446
class	class.Actinobacteria.id.419	rs13413639	A	C	0.0881	0.01253	4.37e-12	16446
class	class.Actinobacteria.id.419	rs12469709	C	T	0.08853	0.01259	5.08e-12	16446
class	class.Actinobacteria.id.419	rs1869829	G	A	0.08644	0.01244	5.77e-12	16446
class	class.Actinobacteria.id.419	rs1374329	G	A	0.08873	0.01278	7.89e-12	16446
class	class.Actinobacteria.id.419	rs6760329	A	G	0.08971	0.01297	1.02e-11	16446
class	class.Actinobacteria.id.419	rs9287442	A	G	0.0895	0.01292	1.11e-11	16446
class	class.Actinobacteria.id.419	rs10188066	G	A	0.0893	0.01297	1.29e-11	16446
class	class.Actinobacteria.id.419	rs10928545	A	G	0.08939	0.01292	1.34e-11	16446
class	class.Actinobacteria.id.419	rs62160860	C	G	0.11427	0.01699	1.36e-11	16443
class	class.Actinobacteria.id.419	rs11693502	C	T	0.08126	0.01189	1.4e-11	16445
class	class.Actinobacteria.id.419	rs2304599	C	G	0.08934	0.01297	1.41e-11	16446
class	class.Actinobacteria.id.419	rs12616520	A	T	0.08899	0.01292	1.45e-11	16446
class	class.Actinobacteria.id.419	rs10187402	G	C	0.08452	0.01248	1.53e-11	16441
class	class.Actinobacteria.id.419	rs4954551	A	G	0.11141	0.01678	1.8e-11	16446
class	class.Actinobacteria.id.419	rs7587285	C	T	0.11143	0.01676	1.81e-11	16446
class	class.Actinobacteria.id.419	rs2278544	A	G	0.08848	0.01294	2.06e-11	16446
class	class.Actinobacteria.id.419	rs2278683	C	A	0.11102	0.01676	2.36e-11	16445
class	class.Actinobacteria.id.419	rs11893318	C	T	0.11055	0.01678	2.87e-11	16445
class	class.Actinobacteria.id.419	rs11679933	G	T	0.08031	0.0119	2.9e-11	16442
class	class.Actinobacteria.id.419	rs1030764	C	T	0.08793	0.01297	3e-11	16446
class	class.Actinobacteria.id.419	rs3820794	C	T	0.08745	0.01296	3.63e-11	16446
class	class.Actinobacteria.id.419	rs932206	C	T	0.07612	0.01147	4.07e-11	16315
class	class.Actinobacteria.id.419	rs6714750	G	A	0.0847	0.01257	4.1e-11	16315
class	class.Actinobacteria.id.419	rs2680880	A	T	0.07718	0.01146	4.76e-11	16446
class	class.Actinobacteria.id.419	rs7581382	C	T	-0.0852	0.01407	5.5e-11	15425
class	class.Actinobacteria.id.419	rs935613	T	C	0.08202	0.01248	7.35e-11	16446
class	class.Actinobacteria.id.419	rs1375132	G	A	0.08145	0.01246	1.03e-10	16444
class	class.Actinobacteria.id.419	rs6747073	C	T	0.08016	0.01244	1.85e-10	16444
class	class.Actinobacteria.id.419	rs6704561	T	C	0.07843	0.01227	2.67e-10	16315
class	class.Actinobacteria.id.419	rs3768998	T	G	0.10758	0.01731	3.29e-10	16445
class	class.Actinobacteria.id.419	rs2016636	A	G	0.07918	0.01248	3.54e-10	16446
class	class.Actinobacteria.id.419	rs12328663	C	T	0.09496	0.01574	4.52e-10	16446
class	class.Actinobacteria.id.419	rs13389481	A	C	0.09761	0.01611	4.6e-10	16444
class	class.Actinobacteria.id.419	rs2874739	T	C	0.09515	0.01574	5.05e-10	16446
class	class.Actinobacteria.id.419	rs1900741	T	C	0.08646	0.01357	5.1e-10	16446
class	class.Actinobacteria.id.419	rs10193348	G	A	0.09486	0.01575	5.37e-10	16446
class	class.Actinobacteria.id.419	rs10167901	T	C	0.09513	0.0158	6.17e-10	16446
class	class.Actinobacteria.id.419	rs10167809	T	C	0.09493	0.0158	6.56e-10	16446
class	class.Actinobacteria.id.419	rs4953948	G	T	0.09492	0.0158	6.57e-10	16446
class	class.Actinobacteria.id.419	rs4954216	A	G	0.09484	0.0158	6.84e-10	16446
class	class.Actinobacteria.id.419	rs7568525	A	G	0.09372	0.01579	7.2e-10	16446
class	class.Actinobacteria.id.419	rs10167884	T	C	0.09469	0.0158	7.26e-10	16446
class	class.Actinobacteria.id.419	rs4954215	A	G	0.09464	0.0158	7.31e-10	16446
class	class.Actinobacteria.id.419	rs10208624	T	C	0.09372	0.01579	7.31e-10	16446
class	class.Actinobacteria.id.419	rs62168942	C	T	0.09475	0.0158	7.39e-10	16446
class	class.Actinobacteria.id.419	rs10182750	C	T	0.09466	0.01581	7.6e-10	16446
class	class.Actinobacteria.id.419	rs4953947	C	A	0.09444	0.01581	7.97e-10	16446
class	class.Actinobacteria.id.419	rs7422031	T	C	0.09403	0.01574	7.98e-10	16446
class	class.Actinobacteria.id.419	rs13409400	C	A	0.09445	0.0158	8.28e-10	16446
class	class.Actinobacteria.id.419	rs7573600	C	G	0.09333	0.01575	8.53e-10	16446
class	class.Actinobacteria.id.419	rs62168941	T	C	0.09442	0.0158	8.61e-10	16446
class	class.Actinobacteria.id.419	rs4954513	A	G	0.10778	0.01737	8.8e-10	16446
class	class.Actinobacteria.id.419	rs16832275	G	C	0.10287	0.01676	8.8e-10	16446
class	class.Actinobacteria.id.419	rs11898045	C	T	0.09308	0.01575	8.84e-10	16446
class	class.Actinobacteria.id.419	rs56903548	T	C	0.09345	0.01574	9.49e-10	16446
class	class.Actinobacteria.id.419	rs4954217	T	C	0.09403	0.0158	9.68e-10	16446
class	class.Actinobacteria.id.419	rs13413872	T	G	0.09401	0.0158	9.68e-10	16446
class	class.Actinobacteria.id.419	rs13402112	C	A	0.09401	0.0158	9.68e-10	16446
class	class.Actinobacteria.id.419	rs10186594	G	A	0.09402	0.0158	9.77e-10	16446
class	class.Actinobacteria.id.419	rs58426504	G	T	0.09273	0.01575	1.01e-09	16446
class	class.Actinobacteria.id.419	rs4954214	T	C	0.09381	0.01581	1.01e-09	16446
class	class.Actinobacteria.id.419	rs3213871	T	C	0.10717	0.01742	1.02e-09	16446
class	class.Actinobacteria.id.419	rs921859	G	A	0.09378	0.0158	1.05e-09	16446
class	class.Actinobacteria.id.419	rs58697996	A	G	0.0929	0.01579	1.06e-09	16446
class	class.Actinobacteria.id.419	rs7601696	A	C	0.0938	0.0158	1.09e-09	16446
class	class.Actinobacteria.id.419	rs6760553	G	A	0.09359	0.01581	1.09e-09	16446
class	class.Actinobacteria.id.419	rs7577258	A	G	0.09371	0.0158	1.12e-09	16446
class	class.Actinobacteria.id.419	rs2017831	T	C	0.09367	0.0158	1.12e-09	16446
class	class.Actinobacteria.id.419	rs3769002	C	T	0.10692	0.01738	1.12e-09	16446
class	class.Actinobacteria.id.419	rs56263017	C	T	0.10681	0.01738	1.14e-09	16446
class	class.Actinobacteria.id.419	rs7565268	C	T	0.09363	0.0158	1.16e-09	16446
class	class.Actinobacteria.id.419	rs56174523	C	A	0.09349	0.0158	1.18e-09	16446
class	class.Actinobacteria.id.419	rs61087958	T	C	0.09266	0.01576	1.23e-09	16446
class	class.Actinobacteria.id.419	rs4953946	G	T	0.09315	0.01581	1.26e-09	16446
class	class.Actinobacteria.id.419	rs11888951	C	T	0.09304	0.01581	1.34e-09	16446
class	class.Actinobacteria.id.419	rs7601683	T	C	0.09311	0.0158	1.43e-09	16446
class	class.Actinobacteria.id.419	rs10174944	T	C	0.093	0.0158	1.44e-09	16445
class	class.Actinobacteria.id.419	rs4954220	A	C	0.09203	0.01579	1.45e-09	16446
class	class.Actinobacteria.id.419	rs7565149	A	T	0.09299	0.0158	1.46e-09	16446
class	class.Actinobacteria.id.419	rs62168934	G	A	0.09291	0.01581	1.51e-09	16446
class	class.Actinobacteria.id.419	rs60350840	G	A	0.09309	0.01581	1.51e-09	16446
class	class.Actinobacteria.id.419	rs4346445	C	A	0.09143	0.01581	1.52e-09	16444
class	class.Actinobacteria.id.419	rs16831498	C	G	0.09376	0.01601	1.61e-09	16446
class	class.Actinobacteria.id.419	rs2164332	C	G	0.10048	0.01674	1.77e-09	16446
class	class.Actinobacteria.id.419	rs4953945	G	C	0.09336	0.01587	1.78e-09	16444
class	class.Actinobacteria.id.419	rs7608980	A	G	0.10646	0.01739	1.81e-09	16446
class	class.Actinobacteria.id.419	rs4954567	T	G	0.0722	0.01196	1.82e-09	16446
class	class.Actinobacteria.id.419	rs6741481	G	A	0.09159	0.01575	1.82e-09	16446
class	class.Actinobacteria.id.419	rs7603805	G	A	0.0918	0.01574	1.89e-09	16446
class	class.Actinobacteria.id.419	rs16832138	A	G	0.10621	0.01738	1.95e-09	16446
class	class.Actinobacteria.id.419	rs2290518	A	G	0.09129	0.01575	2.05e-09	16446
class	class.Actinobacteria.id.419	rs2322725	C	T	0.0999	0.01675	2.12e-09	16446
class	class.Actinobacteria.id.419	rs11884903	C	T	0.09251	0.01596	2.22e-09	16446
class	class.Actinobacteria.id.419	rs16832156	A	G	0.10041	0.01678	2.48e-09	16445
class	class.Actinobacteria.id.419	rs1401687	C	G	0.0716	0.01196	2.49e-09	16446
class	class.Actinobacteria.id.419	rs11903663	G	A	0.08897	0.01577	2.54e-09	16444
class	class.Actinobacteria.id.419	rs58327215	C	G	0.09074	0.01578	2.56e-09	16446
class	class.Actinobacteria.id.419	rs6752519	T	C	0.10417	0.01734	2.61e-09	16446
class	class.Actinobacteria.id.419	rs309132	G	C	0.10397	0.01713	2.61e-09	16446
class	class.Actinobacteria.id.419	rs56067372	T	C	0.10518	0.01739	2.72e-09	16446
class	class.Actinobacteria.id.419	rs4640444	C	T	0.08891	0.01577	2.73e-09	16444
class	class.Actinobacteria.id.419	rs1551497	C	T	0.09155	0.01581	2.74e-09	16445
class	class.Actinobacteria.id.419	rs10179271	C	T	0.07136	0.01196	2.79e-09	16446
class	class.Actinobacteria.id.419	rs16832200	C	T	0.0992	0.01675	2.8e-09	16446
class	class.Actinobacteria.id.419	rs4645053	A	T	0.08882	0.01577	2.83e-09	16444
class	class.Actinobacteria.id.419	rs6739713	G	A	0.07681	0.01271	2.85e-09	16446
class	class.Actinobacteria.id.419	rs4954212	G	A	0.09144	0.01577	2.86e-09	16445
class	class.Actinobacteria.id.419	rs3754690	T	C	0.10749	0.01797	2.9e-09	16446
class	class.Actinobacteria.id.419	rs2164331	T	C	0.10364	0.0174	2.91e-09	16446
class	class.Actinobacteria.id.419	rs12478902	C	T	0.10049	0.01698	2.91e-09	16445
class	class.Actinobacteria.id.419	rs6430561	T	C	0.09053	0.01579	2.93e-09	16446
class	class.Actinobacteria.id.419	rs10209482	C	A	0.09207	0.01598	2.96e-09	16446
class	class.Actinobacteria.id.419	rs11890844	G	A	0.09124	0.01583	3e-09	16445
class	class.Actinobacteria.id.419	rs9941547	A	G	0.07135	0.012	3.24e-09	16337
class	class.Actinobacteria.id.419	rs13410870	A	G	0.08997	0.01575	3.24e-09	16446
class	class.Actinobacteria.id.419	rs309126	C	T	0.09793	0.0163	3.31e-09	16446
class	class.Actinobacteria.id.419	rs6709763	A	C	0.09093	0.01581	3.33e-09	16446
class	class.Actinobacteria.id.419	rs13402101	A	T	0.09107	0.01583	3.36e-09	16445
class	class.Actinobacteria.id.419	rs57829242	G	A	0.09163	0.01596	3.44e-09	16446
class	class.Actinobacteria.id.419	rs13399376	G	A	0.09095	0.01583	3.49e-09	16445
class	class.Actinobacteria.id.419	rs74266324	A	G	0.08471	0.0144	3.5e-09	16315
class	class.Actinobacteria.id.419	rs3754692	C	T	0.07639	0.01271	3.52e-09	16446
class	class.Actinobacteria.id.419	rs17293519	G	A	0.08959	0.01574	3.78e-09	16446
class	class.Actinobacteria.id.419	rs4494812	G	A	0.08821	0.01577	3.82e-09	16444
class	class.Actinobacteria.id.419	rs55634455	C	T	0.10627	0.01795	3.88e-09	16446
class	class.Actinobacteria.id.419	rs4954568	A	T	0.07067	0.01196	3.97e-09	16446
class	class.Actinobacteria.id.419	rs16831264	C	G	0.09011	0.01576	4.02e-09	16445
class	class.Actinobacteria.id.419	rs6430593	A	G	0.09932	0.01676	4.14e-09	16446
class	class.Actinobacteria.id.419	rs6737635	T	G	0.09028	0.01581	4.38e-09	16446
class	class.Actinobacteria.id.419	rs60433564	C	A	0.11928	0.02069	4.41e-09	13623
class	class.Actinobacteria.id.419	rs6749119	G	C	0.08907	0.01574	4.44e-09	16446
class	class.Actinobacteria.id.419	rs10496736	G	C	0.1188	0.02069	4.66e-09	13623
class	class.Actinobacteria.id.419	rs6721838	G	A	0.08936	0.01582	4.77e-09	16446
class	class.Actinobacteria.id.419	rs78141345	A	G	0.10571	0.01796	4.83e-09	16446
class	class.Actinobacteria.id.419	rs11892750	A	G	0.09032	0.01584	4.99e-09	16445
class	class.Actinobacteria.id.419	rs13427494	A	G	0.09075	0.01599	5.05e-09	16446
class	class.Actinobacteria.id.419	rs6715785	A	G	0.07012	0.01195	5.14e-09	16445
class	class.Actinobacteria.id.419	rs11897204	C	T	0.08863	0.01576	5.4e-09	16446
class	class.Actinobacteria.id.419	rs6706466	G	A	0.08847	0.01575	5.43e-09	16446
class	class.Actinobacteria.id.419	rs56369660	G	A	0.08902	0.01576	5.51e-09	16446
class	class.Actinobacteria.id.419	rs4954569	T	C	0.06993	0.01195	5.53e-09	16445
class	class.Actinobacteria.id.419	rs4954242	G	A	0.09158	0.01607	5.64e-09	16446
class	class.Actinobacteria.id.419	rs1979033	A	G	0.06396	0.01138	5.68e-09	16441
class	class.Actinobacteria.id.419	rs11888521	C	G	0.08701	0.01577	5.91e-09	16444
class	class.Actinobacteria.id.419	rs13408096	T	G	0.08914	0.01577	5.98e-09	16445
class	class.Actinobacteria.id.419	rs12233092	A	G	0.09751	0.01685	6.27e-09	16443
class	class.Actinobacteria.id.419	rs4954226	C	T	0.0896	0.01595	6.38e-09	16446
class	class.Actinobacteria.id.419	rs6723108	T	G	0.06429	0.01152	6.6e-09	16446
class	class.Actinobacteria.id.419	rs4954213	T	G	0.08876	0.01577	6.83e-09	16445
class	class.Actinobacteria.id.419	rs4954633	T	C	0.1153	0.02054	6.93e-09	13623
class	class.Actinobacteria.id.419	rs56211644	C	T	0.10401	0.01795	7.76e-09	16446
class	class.Actinobacteria.id.419	rs4954221	A	G	0.08764	0.01578	8.19e-09	16446
class	class.Actinobacteria.id.419	rs11900832	T	C	0.0887	0.01584	8.63e-09	16445
class	class.Actinobacteria.id.419	rs7597802	T	A	0.08865	0.01583	8.73e-09	16445
class	class.Actinobacteria.id.419	rs925966	C	G	0.07089	0.01215	8.98e-09	16315
class	class.Actinobacteria.id.419	rs4954392	G	A	0.06896	0.01196	8.99e-09	16446
class	class.Actinobacteria.id.419	rs4954570	C	G	0.0727	0.01281	9.09e-09	16444
class	class.Actinobacteria.id.419	rs950176	G	A	0.06915	0.01197	9.21e-09	16444
class	class.Actinobacteria.id.419	rs61663334	G	A	0.0855	0.01578	9.56e-09	16445
class	class.Actinobacteria.id.419	rs11889843	A	G	0.08795	0.01577	9.72e-09	16445
class	class.Actinobacteria.id.419	rs7563997	A	T	0.0879	0.01578	9.93e-09	16445
class	class.Actinobacteria.id.419	rs6742013	C	T	0.0887	0.01599	1.02e-08	16446
class	class.Actinobacteria.id.419	rs57543738	C	T	0.10333	0.01804	1.03e-08	16446
class	class.Actinobacteria.id.419	rs60376570	A	G	0.10315	0.01802	1.03e-08	16446
class	class.Actinobacteria.id.419	rs72972104	A	G	0.11393	0.02055	1.03e-08	13623
class	class.Actinobacteria.id.419	rs12616955	T	C	0.06868	0.01196	1.03e-08	16446
class	class.Actinobacteria.id.419	rs78793148	A	C	0.10934	0.01877	1.06e-08	16315
class	class.Actinobacteria.id.419	rs1530559	G	A	0.06456	0.01138	1.06e-08	16315
class	class.Actinobacteria.id.419	rs10928529	A	G	0.08807	0.01584	1.09e-08	16445
class	class.Actinobacteria.id.419	rs2874834	G	A	0.07407	0.01274	1.12e-08	16446
class	class.Actinobacteria.id.419	rs4954566	T	C	0.06828	0.01196	1.25e-08	16446
class	class.Actinobacteria.id.419	rs2305248	G	A	0.08625	0.01575	1.3e-08	16446
class	class.Actinobacteria.id.419	rs7565053	T	A	0.12106	0.02154	1.3e-08	13499
class	class.Actinobacteria.id.419	rs74697610	T	A	0.11207	0.01993	1.31e-08	16206
class	class.Actinobacteria.id.419	rs584226	C	T	0.09775	0.01699	1.33e-08	16446
class	class.Actinobacteria.id.419	rs7371606	G	A	0.07007	0.01216	1.35e-08	16315
class	class.Actinobacteria.id.419	rs4954564	G	A	0.06836	0.01197	1.35e-08	16444
class	class.Actinobacteria.id.419	rs7605229	T	C	0.08811	0.01599	1.37e-08	16446
class	class.Actinobacteria.id.419	rs4954572	T	G	0.06832	0.01203	1.38e-08	16446
class	class.Actinobacteria.id.419	rs4954430	T	C	0.11505	0.02076	1.38e-08	13622
class	class.Actinobacteria.id.419	rs1123848	T	C	0.06836	0.01205	1.48e-08	16444
class	class.Actinobacteria.id.419	rs6727889	T	C	0.08831	0.016	1.49e-08	16446
class	class.Actinobacteria.id.419	rs4954396	C	A	0.06817	0.01203	1.49e-08	16446
class	class.Actinobacteria.id.419	rs16855656	G	A	0.09361	0.0164	1.55e-08	16446
class	class.Actinobacteria.id.419	rs62170081	G	A	0.11501	0.02069	1.56e-08	13623
class	class.Actinobacteria.id.419	rs10803550	T	C	0.06777	0.01196	1.57e-08	16446
class	class.Actinobacteria.id.419	rs953387	C	A	0.06759	0.01196	1.67e-08	16446
class	class.Actinobacteria.id.419	rs2102896	C	T	0.06756	0.01197	1.68e-08	16446
class	class.Actinobacteria.id.419	rs2874874	C	A	0.10175	0.01802	1.7e-08	16446
class	class.Actinobacteria.id.419	rs2056297	T	G	0.06761	0.01196	1.76e-08	16446
class	class.Actinobacteria.id.419	rs56982689	T	C	0.11301	0.02074	1.89e-08	13623
class	class.Actinobacteria.id.419	rs2322812	G	A	0.10123	0.01802	2.04e-08	16446
class	class.Actinobacteria.id.419	rs3769011	T	A	0.10089	0.01803	2.16e-08	16446
class	class.Actinobacteria.id.419	rs72970286	G	T	0.11122	0.02036	2.19e-08	13622
class	class.Actinobacteria.id.419	rs6707289	G	A	0.114	0.02069	2.2e-08	13623
class	class.Actinobacteria.id.419	rs6720497	A	G	0.11399	0.02069	2.2e-08	13623
class	class.Actinobacteria.id.419	rs58080116	G	A	0.10109	0.01802	2.21e-08	16446
class	class.Actinobacteria.id.419	rs4954397	G	A	0.06742	0.01205	2.3e-08	16446
class	class.Actinobacteria.id.419	rs1964776	T	C	0.06739	0.01206	2.48e-08	16446
class	class.Actinobacteria.id.419	rs11897217	T	C	0.08421	0.01579	2.52e-08	16446
class	class.Actinobacteria.id.419	rs61470941	C	T	0.09953	0.018	2.53e-08	16446
class	class.Actinobacteria.id.419	rs10928558	C	T	0.06802	0.0122	2.6e-08	16445
class	class.Actinobacteria.id.419	rs4954445	A	T	0.10029	0.01802	2.61e-08	16446
class	class.Actinobacteria.id.419	rs7594509	T	G	0.08416	0.01579	2.63e-08	16446
class	class.Actinobacteria.id.419	rs2322445	A	T	0.08423	0.01578	2.64e-08	16446
class	class.Actinobacteria.id.419	rs12473760	A	C	0.06658	0.01197	2.67e-08	16446
class	class.Actinobacteria.id.419	rs4954577	G	A	0.06709	0.01205	2.72e-08	16446
class	class.Actinobacteria.id.419	rs6729961	G	T	0.11356	0.02069	2.8e-08	13623
class	class.Actinobacteria.id.419	rs3806502	T	C	0.08568	0.01598	2.9e-08	16446
class	class.Actinobacteria.id.419	rs6705610	G	T	0.0837	0.01575	2.9e-08	16446
class	class.Actinobacteria.id.419	rs16831994	C	T	0.11135	0.02055	3.01e-08	13623
class	class.Actinobacteria.id.419	rs16833335	A	G	0.06689	0.01205	3.03e-08	16446
class	class.Actinobacteria.id.419	rs6738563	T	G	0.06092	0.01138	3.05e-08	16442
class	class.Actinobacteria.id.419	rs1519525	T	C	0.06649	0.01203	3.71e-08	16446
class	class.Actinobacteria.id.419	rs35215526	A	G	0.10439	0.0187	3.82e-08	16442
class	class.Actinobacteria.id.419	rs13008147	G	A	-0.06679	0.01282	4.02e-08	15425
class	class.Actinobacteria.id.419	rs7609188	C	G	0.10986	0.02055	4.03e-08	13623
class	class.Actinobacteria.id.419	rs3820790	T	A	0.09962	0.01822	4.48e-08	16443
class	class.Actinobacteria.id.419	rs62168847	C	T	0.10273	0.0186	4.7e-08	16442
class	class.Actinobacteria.id.419	rs3739022	A	G	0.09758	0.01801	4.9e-08	16446
class	class.Actinobacteria.id.419	rs12992815	G	C	0.09688	0.01788	5.22e-08	16446
class	class.Actinobacteria.id.419	rs7565871	C	G	0.08193	0.01587	5.28e-08	16445
class	class.Actinobacteria.id.419	rs62168843	C	T	0.1022	0.0186	5.32e-08	16442
class	class.Actinobacteria.id.419	rs62168846	A	G	0.10337	0.0187	5.41e-08	16442
class	class.Actinobacteria.id.419	rs9677760	T	A	0.07658	0.01374	5.6e-08	16446
class	class.Actinobacteria.id.419	rs4954578	C	T	0.06544	0.01203	6.18e-08	16446
class	class.Actinobacteria.id.419	rs4954573	G	T	0.06585	0.01219	6.2e-08	16445
class	class.Actinobacteria.id.419	rs1865452	T	C	0.07653	0.01381	6.27e-08	16446
class	class.Actinobacteria.id.419	rs60963894	G	T	0.07653	0.01381	6.27e-08	16446
class	class.Actinobacteria.id.419	rs10496737	G	A	0.07648	0.01381	6.36e-08	16446
class	class.Actinobacteria.id.419	rs56036623	C	T	0.07057	0.01322	6.37e-08	16446
class	class.Actinobacteria.id.419	rs6716987	A	C	0.06502	0.01203	7.5e-08	16446
class	class.Actinobacteria.id.419	rs60453613	C	G	0.07598	0.01381	7.85e-08	16446
class	class.Actinobacteria.id.419	rs12469551	T	G	0.07587	0.01374	7.98e-08	16446
class	class.Actinobacteria.id.419	rs13010498	C	G	-0.06402	0.01214	8.22e-08	16315
class	class.Actinobacteria.id.419	rs7595712	T	C	0.07596	0.01381	9.04e-08	16446
class	class.Actinobacteria.id.419	rs6660520	A	G	0.0713	0.01339	9.21e-08	16441
class	class.Actinobacteria.id.419	rs62168844	G	A	0.10002	0.0186	1e-07	16442
class	class.Actinobacteria.id.419	rs6708957	T	C	0.07534	0.01381	1.01e-07	16446
class	class.Actinobacteria.id.419	rs998451	G	A	0.05846	0.01154	1.04e-07	16445
class	class.Actinobacteria.id.419	rs7513988	C	T	0.06936	0.01313	1.06e-07	16442
class	class.Actinobacteria.id.419	rs6745996	G	A	0.08629	0.01665	1.06e-07	16446
class	class.Actinobacteria.id.419	rs80274970	T	C	0.1032	0.01963	1.07e-07	15956
class	class.Actinobacteria.id.419	rs12022129	G	A	0.06974	0.01321	1.09e-07	16443
class	class.Actinobacteria.id.419	rs1469996	G	A	0.07584	0.01388	1.09e-07	16315
class	class.Actinobacteria.id.419	rs60274701	A	G	0.09487	0.01783	1.2e-07	16445
class	class.Actinobacteria.id.419	rs4954394	G	A	0.06657	0.01288	1.22e-07	16446
class	class.Actinobacteria.id.419	rs10193587	C	T	0.0647	0.0123	1.27e-07	16315
class	class.Actinobacteria.id.419	rs4845143	G	T	0.0691	0.01322	1.35e-07	16443
class	class.Actinobacteria.id.419	rs147616090	T	C	0.07451	0.0138	1.37e-07	16446
class	class.Actinobacteria.id.419	rs1469995	A	G	0.07438	0.0138	1.4e-07	16441
class	class.Actinobacteria.id.419	rs6732236	G	T	0.07434	0.01381	1.5e-07	16446
class	class.Actinobacteria.id.419	rs7564577	T	C	0.0824	0.01612	1.65e-07	16444
class	class.Actinobacteria.id.419	rs10928513	T	C	0.0584	0.01148	1.72e-07	16445
class	class.Actinobacteria.id.419	rs7604460	C	T	0.08244	0.01547	1.85e-07	16315
class	class.Actinobacteria.id.419	rs6430585	A	C	0.07344	0.01371	1.95e-07	16446
class	class.Actinobacteria.id.419	rs7582173	A	G	0.07914	0.01457	2.03e-07	16446
class	class.Actinobacteria.id.419	rs7575241	A	C	0.07428	0.01395	2.04e-07	16445
class	class.Actinobacteria.id.419	rs872151	T	C	0.09147	0.01774	2.12e-07	16446
class	class.Actinobacteria.id.419	rs12471781	A	G	0.08174	0.01556	2.25e-07	16315
class	class.Actinobacteria.id.419	rs4954388	C	T	0.06387	0.01227	2.39e-07	16442
class	class.Actinobacteria.id.419	rs4954571	A	G	0.06486	0.01288	2.58e-07	16444
class	class.Actinobacteria.id.419	rs1028182	T	C	0.06755	0.01322	2.65e-07	16443
class	class.Actinobacteria.id.419	rs10197646	A	G	0.07832	0.01457	2.68e-07	16446
class	class.Actinobacteria.id.419	rs7568884	T	C	0.06225	0.0122	2.75e-07	16446
class	class.Actinobacteria.id.419	rs4954556	A	G	0.1226	0.02474	2.9e-07	9647
class	class.Actinobacteria.id.419	rs13415439	A	C	0.06208	0.01219	2.94e-07	16446
class	class.Actinobacteria.id.419	rs60241067	T	A	0.06492	0.01248	3.04e-07	16446
class	class.Actinobacteria.id.419	rs7556781	G	A	0.0721	0.01369	3.05e-07	16446
class	class.Actinobacteria.id.419	rs4954575	A	G	0.06206	0.01221	3.11e-07	16446
class	class.Actinobacteria.id.419	rs6430580	G	A	0.0829	0.01666	3.13e-07	16446
class	class.Actinobacteria.id.419	rs6733547	T	G	0.07969	0.01599	3.23e-07	16445
class	class.Actinobacteria.id.419	rs10174462	G	C	0.07388	0.01398	3.33e-07	16446
class	class.Actinobacteria.id.419	rs2056226	G	C	0.0688	0.01352	3.34e-07	16315
class	class.Actinobacteria.id.419	rs6540645	G	C	0.06837	0.01346	3.37e-07	16441
class	class.Actinobacteria.id.419	rs1807356	C	T	0.08153	0.01625	3.49e-07	16446
class	class.Actinobacteria.id.419	rs7589832	C	A	0.07229	0.0138	3.51e-07	16446
class	class.Actinobacteria.id.419	rs13007153	C	T	0.06284	0.01226	3.79e-07	16441
class	class.Actinobacteria.id.419	rs73958618	G	A	0.07166	0.01378	4e-07	16446
class	class.Actinobacteria.id.419	rs1028181	T	C	0.06772	0.01346	4.41e-07	16441
class	class.Actinobacteria.id.419	rs59869505	C	A	0.06096	0.01218	4.43e-07	16446
class	class.Actinobacteria.id.419	rs72976292	A	T	0.06104	0.01219	4.44e-07	16441
class	class.Actinobacteria.id.419	rs55809728	A	G	0.10735	0.0218	4.47e-07	13617
class	class.Actinobacteria.id.419	rs309124	G	A	0.07413	0.01454	4.58e-07	16445
class	class.Actinobacteria.id.419	rs4988243	C	T	0.11209	0.02241	4.65e-07	13514
class	class.Actinobacteria.id.419	rs908704	G	A	0.06697	0.01337	4.88e-07	16440
class	class.Actinobacteria.id.419	rs16833170	G	A	0.06078	0.01219	4.94e-07	16446
class	class.Actinobacteria.id.419	rs6685379	G	A	0.06636	0.01329	5e-07	16315
class	class.Actinobacteria.id.419	rs2090661	G	A	0.06173	0.01226	5.46e-07	16442
class	class.Actinobacteria.id.419	rs2254780	T	C	0.07305	0.01469	5.78e-07	16446
class	class.Actinobacteria.id.419	rs1879087	C	T	0.10375	0.02293	6.2e-07	10415
class	class.Actinobacteria.id.419	rs2441384	C	T	0.0728	0.01469	6.25e-07	16446
class	class.Actinobacteria.id.419	rs2138992	A	C	0.06656	0.01346	6.37e-07	16315
class	class.Actinobacteria.id.419	rs309122	G	A	0.0731	0.01454	6.56e-07	16445
class	class.Actinobacteria.id.419	rs11895609	T	A	0.0755	0.01593	6.59e-07	16445
class	class.Actinobacteria.id.419	rs6712127	G	A	0.07169	0.01395	6.67e-07	16446
class	class.Actinobacteria.id.419	rs309123	G	C	0.07343	0.01474	7.46e-07	16445
class	class.Actinobacteria.id.419	rs8047955	A	G	0.05736	0.01163	8.32e-07	16439
class	class.Actinobacteria.id.419	rs8057441	C	T	0.05692	0.01155	8.72e-07	16315
class	class.Actinobacteria.id.419	rs10928554	T	C	0.09046	0.01738	8.75e-07	16315
class	class.Actinobacteria.id.419	rs4440852	C	A	0.06568	0.01347	8.75e-07	16315
class	class.Actinobacteria.id.419	rs309152	C	T	0.07331	0.01498	9.52e-07	16446
class	class.Actinobacteria.id.419	rs75667274	T	C	0.07635	0.0155	1e-06	16440
class	class.Actinobacteria.id.419	rs6430601	T	G	0.07598	0.0161	1.01e-06	16443
class	class.Actinobacteria.id.419	rs112407062	T	C	0.07581	0.01541	1.02e-06	16446
class	class.Actinobacteria.id.419	rs7322849	T	C	0.09267	0.01924	1.03e-06	16446
class	class.Actinobacteria.id.419	rs6713776	G	C	0.07459	0.01456	1.04e-06	16446
class	class.Actinobacteria.id.419	rs10180515	A	T	0.06352	0.01334	1.09e-06	16446
class	class.Actinobacteria.id.419	rs12448146	A	C	0.05589	0.01151	1.14e-06	16315
class	class.Actinobacteria.id.419	rs908703	G	C	0.06357	0.0132	1.15e-06	16440
class	class.Actinobacteria.id.419	rs115553816	A	G	0.07548	0.01542	1.15e-06	16446
class	class.Actinobacteria.id.419	rs1942055	C	G	0.05454	0.01153	1.16e-06	16441
class	class.Actinobacteria.id.419	rs11684458	G	A	0.06317	0.01334	1.17e-06	16446
class	class.Actinobacteria.id.419	rs309119	C	T	0.07222	0.01491	1.17e-06	16446
class	class.Actinobacteria.id.419	rs112396243	T	C	0.07542	0.01541	1.18e-06	16446
class	class.Actinobacteria.id.419	rs309133	C	A	0.07226	0.01485	1.2e-06	16444
class	class.Actinobacteria.id.419	rs2176716	T	C	0.063	0.01334	1.26e-06	16446
class	class.Actinobacteria.id.419	rs16832440	A	G	0.07559	0.0154	1.27e-06	16445
class	class.Actinobacteria.id.419	rs111682961	T	C	0.07528	0.01541	1.29e-06	16445
class	class.Actinobacteria.id.419	rs79826902	A	G	0.07518	0.01541	1.3e-06	16446
class	class.Actinobacteria.id.419	rs12474975	T	A	0.0749	0.01542	1.31e-06	16446
class	class.Actinobacteria.id.419	rs3098104	A	T	0.07523	0.01523	1.31e-06	16445
class	class.Actinobacteria.id.419	rs16832243	T	C	0.07484	0.01542	1.37e-06	16446
class	class.Actinobacteria.id.419	rs1964459	G	C	0.07543	0.01541	1.38e-06	16442
class	class.Actinobacteria.id.419	rs16832205	A	G	0.07488	0.01541	1.39e-06	16446
class	class.Actinobacteria.id.419	rs6728946	G	C	0.07268	0.01503	1.41e-06	16445
class	class.Actinobacteria.id.419	rs12464050	T	G	0.075	0.01542	1.42e-06	16445
class	class.Actinobacteria.id.419	rs309159	T	C	0.0723	0.01505	1.44e-06	16446
class	class.Actinobacteria.id.419	rs4954555	C	T	0.10741	0.02246	1.45e-06	11290
class	class.Actinobacteria.id.419	rs2289959	T	C	0.07024	0.01469	1.45e-06	16446
class	class.Actinobacteria.id.419	rs586964	A	G	0.07473	0.01536	1.46e-06	16445
class	class.Actinobacteria.id.419	rs59213715	C	A	0.0741	0.01535	1.47e-06	16446
class	class.Actinobacteria.id.419	rs75128007	G	A	0.06348	0.01293	1.47e-06	16315
class	class.Actinobacteria.id.419	rs62160866	G	A	0.11842	0.02541	1.51e-06	9647
class	class.Actinobacteria.id.419	rs13387501	T	C	0.06252	0.01334	1.51e-06	16446
class	class.Actinobacteria.id.419	rs41269821	G	A	0.07253	0.01512	1.53e-06	16440
class	class.Actinobacteria.id.419	rs721765	A	C	0.0751	0.0154	1.54e-06	16446
class	class.Actinobacteria.id.419	rs72847650	A	C	-0.0552	0.01178	1.54e-06	15534
class	class.Actinobacteria.id.419	rs309161	A	G	0.07181	0.01491	1.56e-06	16446
class	class.Actinobacteria.id.419	rs6711493	G	A	0.06995	0.01458	1.56e-06	16446
class	class.Actinobacteria.id.419	rs77096272	A	C	0.07468	0.01542	1.59e-06	16445
class	class.Actinobacteria.id.419	rs12476127	G	A	0.07307	0.01503	1.63e-06	16446
class	class.Actinobacteria.id.419	rs6711997	C	T	0.06216	0.01332	1.63e-06	16446
class	class.Actinobacteria.id.419	rs4245838	T	C	0.10684	0.02246	1.63e-06	11290
class	class.Actinobacteria.id.419	rs309170	T	C	0.0712	0.01486	1.66e-06	16446
class	class.Actinobacteria.id.419	rs499483	A	G	0.07423	0.01535	1.68e-06	16445
class	class.Actinobacteria.id.419	rs9926823	C	A	0.05486	0.01151	1.74e-06	16315
class	class.Actinobacteria.id.419	rs16832624	C	T	0.06219	0.01288	1.75e-06	16315
class	class.Actinobacteria.id.419	rs3098103	C	T	0.07431	0.01537	1.75e-06	16446
class	class.Actinobacteria.id.419	rs75753154	C	T	0.0719	0.01503	1.76e-06	16446
class	class.Actinobacteria.id.419	rs309120	C	G	0.07062	0.01486	1.78e-06	16446
class	class.Actinobacteria.id.419	rs1057031	A	G	0.07172	0.01499	1.83e-06	16445
class	class.Actinobacteria.id.419	rs7606267	C	T	0.07174	0.01503	1.84e-06	16446
class	class.Actinobacteria.id.419	rs11688302	T	C	0.05784	0.01219	1.84e-06	16446
class	class.Actinobacteria.id.419	rs57243841	G	A	0.0635	0.01317	1.84e-06	16315
class	class.Actinobacteria.id.419	rs10171677	A	G	0.05295	0.01144	1.86e-06	16315
class	class.Actinobacteria.id.419	rs309158	G	A	0.06949	0.01453	1.87e-06	16446
class	class.Actinobacteria.id.419	rs9939612	T	C	0.05475	0.01151	1.89e-06	16315
class	class.Actinobacteria.id.419	rs3087343	G	T	0.07232	0.0151	1.92e-06	16445
class	class.Actinobacteria.id.419	rs4954557	T	C	0.05889	0.01239	1.95e-06	16446
class	class.Actinobacteria.id.419	rs309166	T	C	0.07073	0.01486	1.97e-06	16445
class	class.Actinobacteria.id.419	rs177917	G	A	0.07079	0.01485	1.97e-06	16446
class	class.Actinobacteria.id.419	rs16832162	A	T	0.07158	0.01503	1.97e-06	16446
class	class.Actinobacteria.id.419	rs72767435	T	C	-0.1272	0.02725	1.97e-06	13031
class	class.Actinobacteria.id.419	rs134296	C	A	0.11027	0.02334	2e-06	14435
class	class.Actinobacteria.id.419	rs2883034	G	A	0.0622	0.01327	2.01e-06	16315
class	class.Actinobacteria.id.419	rs7599898	T	C	0.07211	0.015	2.09e-06	16446
class	class.Actinobacteria.id.419	rs7573555	C	T	0.07134	0.01503	2.1e-06	16446
class	class.Actinobacteria.id.419	rs134366	G	A	0.11017	0.02342	2.12e-06	14435
class	class.Actinobacteria.id.419	rs62168955	T	C	0.24496	0.04998	2.14e-06	3450
class	class.Actinobacteria.id.419	rs10841473	G	C	-0.05861	0.01228	2.14e-06	16444
class	class.Actinobacteria.id.419	rs309118	C	G	0.0697	0.01457	2.15e-06	16445
class	class.Actinobacteria.id.419	rs11745923	G	T	0.05544	0.01151	2.15e-06	16445
class	class.Actinobacteria.id.419	rs78364332	C	T	0.07143	0.01503	2.16e-06	16445
class	class.Actinobacteria.id.419	rs3098102	T	C	0.07043	0.01486	2.17e-06	16446
class	class.Actinobacteria.id.419	rs134372	A	T	0.11014	0.02342	2.19e-06	14435
class	class.Actinobacteria.id.419	rs11738544	A	G	0.05519	0.01145	2.22e-06	16315
class	class.Actinobacteria.id.419	rs6743537	A	G	0.07239	0.01517	2.22e-06	16446
class	class.Actinobacteria.id.419	rs1438303	T	C	0.07176	0.015	2.25e-06	16446
class	class.Actinobacteria.id.419	rs10496738	T	C	0.07392	0.01541	2.26e-06	16446
class	class.Actinobacteria.id.419	rs76380759	A	G	0.0719	0.015	2.26e-06	16446
class	class.Actinobacteria.id.419	rs309167	T	C	0.07307	0.01534	2.29e-06	16446
class	class.Actinobacteria.id.419	rs10871420	G	A	0.05479	0.01158	2.29e-06	16446
class	class.Actinobacteria.id.419	rs2839740	T	G	0.07323	0.0154	2.3e-06	16445
class	class.Actinobacteria.id.419	rs309165	C	T	0.06882	0.01453	2.3e-06	16446
class	class.Actinobacteria.id.419	rs56100046	A	T	0.07328	0.01543	2.3e-06	16445
class	class.Actinobacteria.id.419	rs113974791	G	T	0.07104	0.01503	2.31e-06	16446
class	class.Actinobacteria.id.419	rs7410699	C	G	0.10965	0.02339	2.31e-06	14435
class	class.Actinobacteria.id.419	rs4889375	C	A	0.05458	0.01152	2.32e-06	16315
class	class.Actinobacteria.id.419	rs79954860	T	A	0.10878	0.02315	2.33e-06	13514
class	class.Actinobacteria.id.419	rs11859935	A	G	0.05522	0.01167	2.34e-06	16440
class	class.Actinobacteria.id.419	rs309162	A	T	0.07088	0.01497	2.34e-06	16446
class	class.Actinobacteria.id.419	rs112758679	C	A	0.07096	0.01503	2.34e-06	16446
class	class.Actinobacteria.id.419	rs134363	G	A	0.10987	0.02343	2.35e-06	14435
class	class.Actinobacteria.id.419	rs134286	A	G	0.10916	0.02339	2.35e-06	14435
class	class.Actinobacteria.id.419	rs4988201	G	A	0.07173	0.01512	2.36e-06	16445
class	class.Actinobacteria.id.419	rs134331	G	C	0.11011	0.02344	2.37e-06	14435
class	class.Actinobacteria.id.419	rs3769016	G	A	0.07172	0.015	2.38e-06	16446
class	class.Actinobacteria.id.419	rs614193	T	A	0.07018	0.01486	2.39e-06	16445
class	class.Actinobacteria.id.419	rs7561565	G	T	0.07096	0.01497	2.39e-06	16445
class	class.Actinobacteria.id.419	rs134332	G	A	0.10986	0.02343	2.43e-06	14435
class	class.Actinobacteria.id.419	rs309171	C	G	0.07062	0.01496	2.43e-06	16446
class	class.Actinobacteria.id.419	rs1515761	T	C	0.07843	0.01691	2.44e-06	15658
class	class.Actinobacteria.id.419	rs2090660	T	C	0.06198	0.01297	2.45e-06	16315
class	class.Actinobacteria.id.419	rs134371	T	C	0.10946	0.02342	2.48e-06	14435
class	class.Actinobacteria.id.419	rs134333	G	A	0.10992	0.02344	2.48e-06	14435
class	class.Actinobacteria.id.419	rs12935228	G	A	0.05401	0.0115	2.49e-06	16315
class	class.Actinobacteria.id.419	rs660002	T	C	0.06849	0.01453	2.52e-06	16446
class	class.Actinobacteria.id.419	rs4954558	G	A	0.06125	0.01288	2.55e-06	16315
class	class.Actinobacteria.id.419	rs134316	G	A	0.10875	0.02339	2.55e-06	14435
class	class.Actinobacteria.id.419	rs7581814	G	C	0.07087	0.01503	2.57e-06	16445
class	class.Actinobacteria.id.419	rs6756200	C	T	0.0531	0.0114	2.61e-06	16315
class	class.Actinobacteria.id.419	rs2413305	A	G	0.10939	0.02343	2.61e-06	14435
class	class.Actinobacteria.id.419	rs2413308	T	G	0.10863	0.02339	2.61e-06	14435
class	class.Actinobacteria.id.419	rs134307	T	C	0.10871	0.02339	2.61e-06	14435
class	class.Actinobacteria.id.419	rs6753232	C	T	0.07124	0.015	2.61e-06	16446
class	class.Actinobacteria.id.419	rs2413306	G	A	0.10857	0.02339	2.62e-06	14435
class	class.Actinobacteria.id.419	rs80261410	C	T	0.06204	0.01294	2.64e-06	16315
class	class.Actinobacteria.id.419	rs3099428	G	C	0.06986	0.01486	2.65e-06	16446
class	class.Actinobacteria.id.419	rs3099427	G	A	0.06987	0.01486	2.66e-06	16446
class	class.Actinobacteria.id.419	rs12928452	A	C	0.05365	0.01146	2.68e-06	16440
class	class.Actinobacteria.id.419	rs1960171	T	C	0.05911	0.01241	2.68e-06	16315
class	class.Actinobacteria.id.419	rs134317	A	G	0.10872	0.02337	2.69e-06	14435
class	class.Actinobacteria.id.419	rs2176718	G	A	0.05693	0.01218	2.69e-06	16442
class	class.Actinobacteria.id.419	rs134294	T	A	0.1083	0.02338	2.69e-06	14435
class	class.Actinobacteria.id.419	rs73958638	G	A	0.10608	0.02317	2.7e-06	12433
class	class.Actinobacteria.id.419	rs79176913	A	C	0.0708	0.01503	2.71e-06	16445
class	class.Actinobacteria.id.419	rs6518933	G	A	0.1086	0.02339	2.71e-06	14435
class	class.Actinobacteria.id.419	rs1961273	C	T	0.05895	0.01255	2.72e-06	16446
class	class.Actinobacteria.id.419	rs4334924	A	G	0.05552	0.01159	2.74e-06	16441
class	class.Actinobacteria.id.419	rs503227	C	T	0.07078	0.01511	2.75e-06	16445
class	class.Actinobacteria.id.419	rs134295	T	C	0.10802	0.02338	2.75e-06	14435
class	class.Actinobacteria.id.419	rs4988163	T	G	0.07116	0.01511	2.76e-06	16445
class	class.Actinobacteria.id.419	rs11678502	C	T	0.0545	0.01157	2.76e-06	16446
class	class.Actinobacteria.id.419	rs309142	C	T	0.06803	0.01452	2.81e-06	16446
class	class.Actinobacteria.id.419	rs12472293	C	T	0.07008	0.01494	2.82e-06	16446
class	class.Actinobacteria.id.419	rs61253125	C	T	0.07109	0.01512	2.87e-06	16445
class	class.Actinobacteria.id.419	rs134306	A	G	0.10826	0.02339	2.89e-06	14435
class	class.Actinobacteria.id.419	rs2459217	G	A	0.08234	0.0178	2.89e-06	15553
class	class.Actinobacteria.id.419	rs12986776	C	G	0.05445	0.01157	2.9e-06	16446
class	class.Actinobacteria.id.419	rs309150	A	T	0.07015	0.01497	2.92e-06	16446
class	class.Actinobacteria.id.419	rs2413309	G	A	0.10763	0.02339	2.92e-06	14435
class	class.Actinobacteria.id.419	rs309172	G	A	0.06837	0.01475	2.92e-06	16446
class	class.Actinobacteria.id.419	rs134311	A	G	0.10784	0.02338	2.95e-06	14435
class	class.Actinobacteria.id.419	rs3112496	T	C	0.06909	0.01486	2.97e-06	16446
class	class.Actinobacteria.id.419	rs134289	A	C	0.10789	0.02338	2.98e-06	14435
class	class.Actinobacteria.id.419	rs4888172	A	G	0.05363	0.0115	2.99e-06	16315
class	class.Actinobacteria.id.419	rs59413285	T	G	0.0708	0.01501	3.01e-06	16446
class	class.Actinobacteria.id.419	rs6750549	G	A	0.07081	0.01514	3.04e-06	16315
class	class.Actinobacteria.id.419	rs134308	T	C	0.10779	0.02339	3.04e-06	14435
class	class.Actinobacteria.id.419	rs62168830	T	A	0.0707	0.01501	3.1e-06	16446
class	class.Actinobacteria.id.419	rs57530667	G	A	0.0707	0.01501	3.1e-06	16446
class	class.Actinobacteria.id.419	rs2413310	T	A	0.10739	0.02339	3.1e-06	14435
class	class.Actinobacteria.id.419	rs111837148	A	G	0.07092	0.01512	3.12e-06	16445
class	class.Actinobacteria.id.419	rs4954272	G	A	0.07694	0.01669	3.19e-06	16446
class	class.Actinobacteria.id.419	rs3099429	A	T	0.07032	0.0151	3.19e-06	16446
class	class.Actinobacteria.id.419	rs134293	T	C	0.10733	0.02338	3.26e-06	14435
class	class.Actinobacteria.id.419	rs1435577	G	C	0.07062	0.01511	3.29e-06	16445
class	class.Actinobacteria.id.419	rs134288	G	C	0.10746	0.02339	3.39e-06	14435
class	class.Actinobacteria.id.419	rs134300	A	G	0.10708	0.02338	3.41e-06	14435
class	class.Actinobacteria.id.419	rs134301	C	T	0.10713	0.02338	3.42e-06	14435
class	class.Actinobacteria.id.419	rs134290	G	C	0.10705	0.02338	3.42e-06	14435
class	class.Actinobacteria.id.419	rs134291	A	G	0.10705	0.02338	3.42e-06	14435
class	class.Actinobacteria.id.419	rs134285	C	T	0.10731	0.0234	3.45e-06	14435
class	class.Actinobacteria.id.419	rs4594504	C	A	0.07047	0.01511	3.45e-06	16445
class	class.Actinobacteria.id.419	rs4888173	G	A	0.05326	0.0115	3.47e-06	16315
class	class.Actinobacteria.id.419	rs12899991	A	T	0.07207	0.01539	3.55e-06	16315
class	class.Actinobacteria.id.419	rs62168833	A	G	0.07041	0.01501	3.59e-06	16446
class	class.Actinobacteria.id.419	rs895285	G	A	0.07137	0.01541	3.73e-06	16446
class	class.Actinobacteria.id.419	rs134287	C	A	0.10705	0.02339	3.75e-06	14435
class	class.Actinobacteria.id.419	rs134323	C	A	0.10786	0.02344	3.84e-06	14435
class	class.Actinobacteria.id.419	rs134292	G	A	0.10662	0.02338	3.92e-06	14435
class	class.Actinobacteria.id.419	rs134309	A	G	0.10676	0.02338	3.93e-06	14435
class	class.Actinobacteria.id.419	rs134304	C	T	0.10661	0.02339	3.99e-06	14435
class	class.Actinobacteria.id.419	rs134305	A	G	0.10677	0.02339	4.03e-06	14435
class	class.Actinobacteria.id.419	rs4312299	C	G	0.05335	0.01159	4.03e-06	16441
class	class.Actinobacteria.id.419	rs139939202	A	G	0.07225	0.01543	4.07e-06	16444
class	class.Actinobacteria.id.419	rs134310	A	T	0.10638	0.02339	4.08e-06	14435
class	class.Actinobacteria.id.419	rs4954559	G	A	0.05972	0.01286	4.1e-06	16315
class	class.Actinobacteria.id.419	rs72711368	T	C	0.05456	0.01172	4.12e-06	16315
class	class.Actinobacteria.id.419	rs11150406	C	T	0.05284	0.01149	4.16e-06	16315
class	class.Actinobacteria.id.419	rs7607920	C	T	0.06955	0.015	4.18e-06	16446
class	class.Actinobacteria.id.419	rs309154	T	C	0.07112	0.01534	4.22e-06	16446
class	class.Actinobacteria.id.419	rs134302	C	T	0.10639	0.02339	4.24e-06	14435
class	class.Actinobacteria.id.419	rs12049045	A	G	0.05257	0.01138	4.26e-06	16444
class	class.Actinobacteria.id.419	rs134282	G	A	0.10641	0.02341	4.28e-06	14435
class	class.Actinobacteria.id.419	rs134339	A	G	0.10728	0.02344	4.35e-06	14435
class	class.Actinobacteria.id.419	rs35564151	G	A	0.05156	0.01144	4.39e-06	16315
class	class.Actinobacteria.id.419	rs1376754	G	A	0.05168	0.0112	4.47e-06	16315
class	class.Actinobacteria.id.419	rs2413312	A	G	0.10664	0.02342	4.49e-06	14435
class	class.Actinobacteria.id.419	rs34007021	T	C	0.06931	0.015	4.54e-06	16446
class	class.Actinobacteria.id.419	rs2304366	T	C	0.06943	0.01503	4.55e-06	16446
class	class.Actinobacteria.id.419	rs2230437	T	C	0.05302	0.01138	4.55e-06	16445
class	class.Actinobacteria.id.419	rs11674937	C	G	0.05968	0.0134	4.61e-06	16446
class	class.Actinobacteria.id.419	rs11655079	T	C	-0.05649	0.01238	4.61e-06	16442
class	class.Actinobacteria.id.419	rs6432655	A	G	0.05126	0.01114	4.66e-06	16446
class	class.Actinobacteria.id.419	rs134377	A	G	0.10658	0.02343	4.73e-06	14435
class	class.Actinobacteria.id.419	rs134384	T	C	0.11316	0.02446	4.79e-06	14435
class	class.Actinobacteria.id.419	rs73957037	A	C	0.06848	0.01468	4.79e-06	16444
class	class.Actinobacteria.id.419	rs134373	T	C	0.10614	0.02342	4.8e-06	14435
class	class.Actinobacteria.id.419	rs4072434	C	G	0.0533	0.01157	4.8e-06	16446
class	class.Actinobacteria.id.419	rs7569447	C	A	0.07142	0.01606	4.86e-06	16446
class	class.Actinobacteria.id.419	rs134374	C	T	0.10631	0.02342	4.87e-06	14435
class	class.Actinobacteria.id.419	rs309157	A	G	0.07043	0.01534	4.91e-06	16446
class	class.Actinobacteria.id.419	rs4072435	C	T	0.05314	0.01157	4.96e-06	16446
class	class.Actinobacteria.id.419	rs10221893	C	T	0.05307	0.01157	5.02e-06	16446
class	class.Actinobacteria.id.419	rs12467569	C	T	0.06889	0.015	5.03e-06	16446
class	class.Actinobacteria.id.419	rs134376	G	A	0.10625	0.02343	5.06e-06	14435
class	class.Actinobacteria.id.419	rs134381	T	C	0.10576	0.02349	5.12e-06	14435
class	class.Actinobacteria.id.419	rs5001584	A	G	0.05263	0.01161	5.22e-06	16315
class	class.Actinobacteria.id.419	rs3769001	G	A	0.06916	0.01511	5.23e-06	16445
class	class.Actinobacteria.id.419	rs75524146	T	C	0.07046	0.01541	5.25e-06	16446
class	class.Actinobacteria.id.419	rs309113	A	C	0.06745	0.01486	5.27e-06	16445
class	class.Actinobacteria.id.419	rs2459218	T	C	0.07639	0.01707	5.27e-06	15661
class	class.Actinobacteria.id.419	rs11743825	T	C	0.05334	0.01151	5.28e-06	16446
class	class.Actinobacteria.id.419	rs134347	T	C	0.10594	0.02342	5.35e-06	14435
class	class.Actinobacteria.id.419	rs12465544	T	C	0.06901	0.01501	5.39e-06	16446
class	class.Actinobacteria.id.419	rs134391	T	C	0.10507	0.02347	5.42e-06	14435
class	class.Actinobacteria.id.419	rs134283	A	G	0.10545	0.02341	5.42e-06	14435
class	class.Actinobacteria.id.419	rs134385	C	T	0.11233	0.02446	5.52e-06	14435
class	class.Actinobacteria.id.419	rs134383	G	A	0.1125	0.02446	5.59e-06	14435
class	class.Actinobacteria.id.419	rs4988274	A	T	0.06999	0.01533	5.61e-06	16315
class	class.Actinobacteria.id.419	rs12446319	C	T	0.05087	0.01123	5.61e-06	16446
class	class.Actinobacteria.id.419	rs134387	C	T	0.10481	0.02349	5.62e-06	14435
class	class.Actinobacteria.id.419	rs2413311	T	C	0.10475	0.02363	5.64e-06	14435
class	class.Actinobacteria.id.419	rs134396	T	G	0.10394	0.02346	5.7e-06	14435
class	class.Actinobacteria.id.419	rs76622824	G	A	0.06843	0.015	5.71e-06	16446
class	class.Actinobacteria.id.419	rs62168792	G	A	0.06842	0.015	5.71e-06	16446
class	class.Actinobacteria.id.419	rs6708336	A	T	0.05082	0.01132	5.76e-06	16446
class	class.Actinobacteria.id.419	rs7573778	T	C	0.06882	0.01502	5.79e-06	16446
class	class.Actinobacteria.id.419	rs60253740	T	G	0.0704	0.01516	5.79e-06	16315
class	class.Actinobacteria.id.419	rs134400	A	G	0.10387	0.02346	5.93e-06	14435
class	class.Actinobacteria.id.419	rs3814355	T	C	0.05066	0.01133	5.95e-06	16446
class	class.Actinobacteria.id.419	rs1446586	G	A	0.06839	0.015	5.95e-06	16446
class	class.Actinobacteria.id.419	rs11682960	T	C	0.05078	0.01116	5.96e-06	16440
class	class.Actinobacteria.id.419	rs134409	A	G	0.10396	0.02347	6e-06	14435
class	class.Actinobacteria.id.419	rs134408	G	A	0.10396	0.02347	6e-06	14435
class	class.Actinobacteria.id.419	rs108272	G	C	0.1045	0.02349	6.01e-06	14435
class	class.Actinobacteria.id.419	rs134407	A	G	0.1115	0.02443	6.02e-06	14435
class	class.Actinobacteria.id.419	rs62168897	T	C	0.05073	0.01132	6.02e-06	16445
class	class.Actinobacteria.id.419	rs134393	T	C	0.10378	0.02347	6.14e-06	14435
class	class.Actinobacteria.id.419	rs28579	C	G	0.10355	0.02346	6.17e-06	14435
class	class.Actinobacteria.id.419	rs134330	C	G	0.10549	0.02344	6.25e-06	14435
class	class.Actinobacteria.id.419	rs12931368	T	C	0.05062	0.01123	6.26e-06	16441
class	class.Actinobacteria.id.419	rs12475398	T	C	0.06972	0.01513	6.27e-06	16444
class	class.Actinobacteria.id.419	rs134392	T	C	0.10355	0.02347	6.29e-06	14435
class	class.Actinobacteria.id.419	rs60966546	T	C	0.06843	0.01501	6.3e-06	16446
class	class.Actinobacteria.id.419	rs2034261	T	G	0.0506	0.01133	6.36e-06	16446
class	class.Actinobacteria.id.419	rs62168836	A	G	0.06849	0.01502	6.43e-06	16446
class	class.Actinobacteria.id.419	rs4988145	C	A	0.06838	0.01512	6.46e-06	16445
class	class.Actinobacteria.id.419	rs6430612	C	T	0.05252	0.01151	6.48e-06	16446
class	class.Actinobacteria.id.419	rs72974159	T	C	0.06	0.0132	6.51e-06	16315
class	class.Actinobacteria.id.419	rs2322813	G	A	0.06951	0.01516	6.51e-06	16443
class	class.Actinobacteria.id.419	rs6893855	C	A	-0.07791	0.0173	6.57e-06	16445
class	class.Actinobacteria.id.419	rs7732645	C	T	-0.07733	0.0173	6.57e-06	16446
class	class.Actinobacteria.id.419	rs134389	G	T	0.1109	0.02443	6.58e-06	14435
class	class.Actinobacteria.id.419	rs55842567	A	G	0.05333	0.01152	6.62e-06	16445
class	class.Actinobacteria.id.419	rs16832417	T	C	0.07028	0.01541	6.7e-06	16446
class	class.Actinobacteria.id.419	rs2278682	C	G	0.06714	0.01491	6.71e-06	16445
class	class.Actinobacteria.id.419	rs961360	G	A	0.06812	0.01497	6.74e-06	16446
class	class.Actinobacteria.id.419	rs13024450	C	T	0.05236	0.01157	6.91e-06	16446
class	class.Actinobacteria.id.419	rs134394	T	C	0.10295	0.02347	6.98e-06	14435
class	class.Actinobacteria.id.419	rs134395	A	C	0.10292	0.02346	6.98e-06	14435
class	class.Actinobacteria.id.419	rs4664367	G	C	0.0504	0.01116	6.98e-06	16442
class	class.Actinobacteria.id.419	rs1496374	A	G	-0.07735	0.01731	6.98e-06	16445
class	class.Actinobacteria.id.419	rs68005421	C	G	0.05328	0.01173	7.04e-06	16315
class	class.Actinobacteria.id.419	rs7700479	T	A	-0.07741	0.01733	7.06e-06	16446
class	class.Actinobacteria.id.419	rs6452041	G	C	-0.07771	0.01743	7.13e-06	16337
class	class.Actinobacteria.id.419	rs79633114	T	C	0.0693	0.01517	7.14e-06	16443
class	class.Actinobacteria.id.419	rs6430594	G	A	0.06784	0.01502	7.19e-06	16445
class	class.Actinobacteria.id.419	rs3814354	A	G	0.05031	0.01132	7.26e-06	16446
class	class.Actinobacteria.id.419	rs134329	A	G	0.10477	0.02344	7.31e-06	14435
class	class.Actinobacteria.id.419	rs1533649	A	G	0.05903	0.01294	7.42e-06	16315
class	class.Actinobacteria.id.419	rs80083040	T	G	0.15565	0.03452	7.42e-06	8136
class	class.Actinobacteria.id.419	rs7592050	G	A	0.06803	0.01502	7.44e-06	16446
class	class.Actinobacteria.id.419	rs56146525	C	A	0.05303	0.01149	7.54e-06	16445
class	class.Actinobacteria.id.419	rs10200263	C	T	0.052	0.01153	7.58e-06	16446
class	class.Actinobacteria.id.419	rs10166142	G	A	0.0502	0.01132	7.63e-06	16446
class	class.Actinobacteria.id.419	rs76097170	T	C	0.06707	0.01484	7.63e-06	16443
class	class.Actinobacteria.id.419	rs134268	C	T	0.1022	0.02322	7.63e-06	14433
class	class.Actinobacteria.id.419	rs134404	A	T	0.10571	0.02388	7.65e-06	14435
class	class.Actinobacteria.id.419	rs56271357	T	C	0.05013	0.01132	7.66e-06	16446
class	class.Actinobacteria.id.419	rs2491158	G	A	0.06748	0.01516	7.71e-06	15663
class	class.Actinobacteria.id.419	rs7721660	G	T	-0.07725	0.01738	7.75e-06	16446
class	class.Actinobacteria.id.419	rs1496375	C	T	-0.07714	0.01732	7.79e-06	16445
class	class.Actinobacteria.id.419	rs134416	A	G	0.10298	0.02346	7.86e-06	14435
class	class.Actinobacteria.id.419	rs961091	G	A	0.05016	0.01121	7.87e-06	16444
class	class.Actinobacteria.id.419	rs9937275	A	G	0.0519	0.01165	7.87e-06	16315
class	class.Actinobacteria.id.419	rs56104584	C	T	0.05291	0.01152	7.88e-06	16445
class	class.Actinobacteria.id.419	rs79931555	G	A	0.09642	0.02193	7.9e-06	14620
class	class.Actinobacteria.id.419	rs56042615	A	G	0.05293	0.01152	7.93e-06	16445
class	class.Actinobacteria.id.419	rs134410	T	C	0.10244	0.02347	8.05e-06	14435
class	class.Actinobacteria.id.419	rs2243193	A	G	0.05706	0.01282	8.05e-06	16446
class	class.Actinobacteria.id.419	rs11895319	C	T	0.06561	0.01465	8.07e-06	16446
class	class.Actinobacteria.id.419	rs72717432	A	G	0.05257	0.01153	8.12e-06	16315
class	class.Actinobacteria.id.419	rs12187440	A	G	0.05248	0.01149	8.2e-06	16445
class	class.Actinobacteria.id.419	rs319899	A	G	0.07337	0.01625	8.2e-06	15665
class	class.Actinobacteria.id.419	rs134419	C	T	0.11029	0.0245	8.21e-06	14435
class	class.Actinobacteria.id.419	rs319900	C	A	0.06881	0.01515	8.33e-06	15664
class	class.Actinobacteria.id.419	rs4953938	A	G	0.04981	0.01134	8.39e-06	16446
class	class.Actinobacteria.id.419	rs134411	C	T	0.10231	0.02347	8.51e-06	14435
class	class.Actinobacteria.id.419	rs12474093	A	G	0.07093	0.01586	8.56e-06	16206
class	class.Actinobacteria.id.419	rs134417	A	C	0.10234	0.02346	8.64e-06	14435
class	class.Actinobacteria.id.419	rs13018756	C	T	0.05174	0.01157	8.67e-06	16446
class	class.Actinobacteria.id.419	rs12373779	C	A	0.06799	0.01505	8.77e-06	16445
class	class.Actinobacteria.id.419	rs1983357	C	A	0.06227	0.01396	8.78e-06	15665
class	class.Actinobacteria.id.419	rs2278731	C	T	0.06744	0.01499	8.85e-06	16446
class	class.Actinobacteria.id.419	rs1947112	G	A	0.04979	0.01132	8.87e-06	16445
class	class.Actinobacteria.id.419	rs1056465	A	T	0.05263	0.01149	8.88e-06	16445
class	class.Actinobacteria.id.419	rs6889494	T	C	0.05216	0.0115	8.95e-06	16445
class	class.Actinobacteria.id.419	rs10165053	C	T	0.05188	0.01158	8.95e-06	16443
class	class.Actinobacteria.id.419	rs9800013	G	A	0.05983	0.01382	8.95e-06	16337
class	class.Actinobacteria.id.419	rs11742144	A	G	0.05212	0.01153	9.04e-06	16446
class	class.Actinobacteria.id.419	rs1390633	T	G	-0.07653	0.01733	9.08e-06	16446
class	class.Actinobacteria.id.419	rs7003528	T	C	0.05267	0.01201	9.09e-06	16315
class	class.Actinobacteria.id.419	rs11925340	C	A	0.06239	0.01397	9.1e-06	15665
class	class.Actinobacteria.id.419	rs2198214	C	T	0.04953	0.01114	9.13e-06	16443
class	class.Actinobacteria.id.419	rs60317558	A	G	-0.08126	0.01823	9.19e-06	16442
class	class.Actinobacteria.id.419	rs4889377	A	G	0.05105	0.01152	9.38e-06	16315
class	class.Actinobacteria.id.419	rs78274583	T	C	0.06859	0.01541	9.44e-06	16446
class	class.Actinobacteria.id.419	rs2243174	G	A	0.05654	0.01281	9.45e-06	16445
class	class.Actinobacteria.id.419	rs2357913	G	A	0.04958	0.01115	9.45e-06	16446
class	class.Actinobacteria.id.419	rs2386683	T	C	-0.07638	0.01733	9.48e-06	16445
class	class.Actinobacteria.id.419	rs112084119	T	C	0.06597	0.01501	9.54e-06	16445
class	class.Actinobacteria.id.419	rs77985886	T	C	0.08668	0.01922	9.56e-06	16446
class	class.Actinobacteria.id.419	rs58110576	A	C	0.05198	0.01173	9.61e-06	16315
class	class.Actinobacteria.id.419	rs11886852	A	G	0.06562	0.01465	9.66e-06	16446
class	class.Actinobacteria.id.419	rs72717440	T	A	0.05202	0.0115	9.68e-06	16445
class	class.Actinobacteria.id.419	rs34847072	C	G	0.05241	0.01152	9.7e-06	16445
class	class.Actinobacteria.id.419	rs10187990	G	A	0.04949	0.01133	9.73e-06	16446
class	class.Actinobacteria.id.419	rs58509842	A	G	0.06807	0.01507	9.73e-06	16446
class	class.Actinobacteria.id.419	rs28815269	G	A	0.05151	0.01161	9.75e-06	16315
class	class.Actinobacteria.id.419	rs13094880	T	C	0.06236	0.014	9.76e-06	15665
class	class.Actinobacteria.id.419	rs2686790	T	C	0.06605	0.015	9.8e-06	16446
class	class.Actinobacteria.id.419	rs358060	G	T	-0.05012	0.01136	9.8e-06	16440
class	class.Actinobacteria.id.419	rs309143	G	A	0.06643	0.01496	9.83e-06	16446
class	class.Actinobacteria.id.419	rs1517925	C	T	0.06198	0.01396	9.84e-06	15665
class	class.Actinobacteria.id.419	rs1374289	T	C	0.04947	0.01133	9.93e-06	16445
class	class.Alphaproteobacteria.id.2379	rs9813022	A	G	-0.07552	0.01534	8.5e-07	9658
class	class.Alphaproteobacteria.id.2379	rs76784716	A	G	0.13019	0.0267	9.27e-07	9658
class	class.Alphaproteobacteria.id.2379	rs140912403	C	T	-0.15681	0.03165	1.06e-06	8585
class	class.Alphaproteobacteria.id.2379	rs77497586	T	G	0.1282	0.02668	1.22e-06	9653
class	class.Alphaproteobacteria.id.2379	rs75071199	A	C	0.12748	0.0267	1.42e-06	9658
class	class.Alphaproteobacteria.id.2379	rs55661963	C	A	0.12737	0.02669	1.67e-06	9657
class	class.Alphaproteobacteria.id.2379	rs34569731	A	G	0.07364	0.01569	2.78e-06	9180
class	class.Alphaproteobacteria.id.2379	rs10803434	A	T	-0.0692	0.01483	3.36e-06	9180
class	class.Alphaproteobacteria.id.2379	rs10803433	T	G	-0.06893	0.01484	3.58e-06	9180
class	class.Alphaproteobacteria.id.2379	rs6429803	C	A	-0.06853	0.01485	4.13e-06	9180
class	class.Alphaproteobacteria.id.2379	rs12740709	A	C	-0.06808	0.01485	4.69e-06	9180
class	class.Alphaproteobacteria.id.2379	rs55876211	C	T	-0.08139	0.01836	6.06e-06	9654
class	class.Alphaproteobacteria.id.2379	rs7960664	G	A	0.09761	0.02144	7.13e-06	9661
class	class.Alphaproteobacteria.id.2379	rs58955578	T	C	0.13396	0.0304	7.75e-06	8238
class	class.Alphaproteobacteria.id.2379	rs17070864	C	A	-0.07695	0.01737	7.84e-06	9661
class	class.Alphaproteobacteria.id.2379	rs17061716	G	C	0.09319	0.02069	7.85e-06	9530
class	class.Alphaproteobacteria.id.2379	rs12977163	G	C	0.06837	0.01533	8.11e-06	9180
class	class.Alphaproteobacteria.id.2379	rs6746957	A	G	-0.17326	0.0364	9.11e-06	5652
class	class.Alphaproteobacteria.id.2379	rs56752332	T	G	-0.07962	0.01835	9.65e-06	9653
class	class.Bacilli.id.1673	rs2952251	A	G	-0.06085	0.01234	6.59e-07	17493
class	class.Bacilli.id.1673	rs77558518	A	G	-0.10942	0.02221	7.18e-07	15969
class	class.Bacilli.id.1673	rs57872228	C	T	-0.07185	0.01459	7.28e-07	17508
class	class.Bacilli.id.1673	rs12642660	A	G	-0.0778	0.01542	8.32e-07	17507
class	class.Bacilli.id.1673	rs35344081	G	A	0.06191	0.01266	9.35e-07	17507
class	class.Bacilli.id.1673	rs78938557	T	C	0.10809	0.02319	9.54e-07	15359
class	class.Bacilli.id.1673	rs11730038	G	A	-0.06437	0.01282	1.07e-06	17510
class	class.Bacilli.id.1673	rs76717940	T	A	0.15633	0.03259	1.07e-06	8017
class	class.Bacilli.id.1673	rs2009619	A	G	-0.05963	0.01237	1.17e-06	17506
class	class.Bacilli.id.1673	rs4131679	C	T	-0.06416	0.01282	1.17e-06	17510
class	class.Bacilli.id.1673	rs4293791	C	T	-0.06393	0.0128	1.23e-06	17509
class	class.Bacilli.id.1673	rs17708276	A	G	-0.07953	0.01655	1.34e-06	17399
class	class.Bacilli.id.1673	rs1962325	C	G	0.05488	0.01143	1.6e-06	17489
class	class.Bacilli.id.1673	rs74352383	T	A	-0.1041	0.02167	1.69e-06	16652
class	class.Bacilli.id.1673	rs9581006	C	T	0.2253	0.04677	1.8e-06	4253
class	class.Bacilli.id.1673	rs80205102	C	T	-0.06281	0.01283	2e-06	17510
class	class.Bacilli.id.1673	rs11110282	A	G	-0.10481	0.02163	2.08e-06	16159
class	class.Bacilli.id.1673	rs2975635	T	C	-0.05717	0.01216	2.32e-06	17504
class	class.Bacilli.id.1673	rs6813875	A	G	-0.06214	0.01281	2.44e-06	17510
class	class.Bacilli.id.1673	rs9445783	T	A	-0.10234	0.02166	2.53e-06	16652
class	class.Bacilli.id.1673	rs80327990	G	A	-0.06205	0.01283	2.62e-06	17510
class	class.Bacilli.id.1673	rs12368593	C	A	-0.10489	0.02188	2.64e-06	16159
class	class.Bacilli.id.1673	rs11967379	T	C	-0.10248	0.02153	2.65e-06	16652
class	class.Bacilli.id.1673	rs113280052	C	T	-0.10489	0.02231	2.73e-06	15969
class	class.Bacilli.id.1673	rs80123130	G	A	-0.06181	0.01283	2.91e-06	17510
class	class.Bacilli.id.1673	rs4699544	A	C	-0.06173	0.01283	2.97e-06	17510
class	class.Bacilli.id.1673	rs80243853	G	A	-0.10437	0.02189	3.07e-06	16159
class	class.Bacilli.id.1673	rs4028634	T	C	0.05111	0.01094	3.08e-06	17510
class	class.Bacilli.id.1673	rs78368499	T	C	-0.10118	0.02166	3.1e-06	16652
class	class.Bacilli.id.1673	rs11248956	C	T	0.05786	0.01263	3.16e-06	17510
class	class.Bacilli.id.1673	rs11110281	T	C	-0.10499	0.02206	3.17e-06	16048
class	class.Bacilli.id.1673	rs60533369	A	C	-0.06142	0.01282	3.3e-06	17510
class	class.Bacilli.id.1673	rs11729948	A	G	-0.06137	0.01283	3.43e-06	17510
class	class.Bacilli.id.1673	rs11110276	T	G	-0.10234	0.02162	3.53e-06	16159
class	class.Bacilli.id.1673	rs2952176	G	A	-0.05604	0.01212	3.54e-06	17504
class	class.Bacilli.id.1673	rs7959495	C	A	-0.10331	0.02179	3.66e-06	16159
class	class.Bacilli.id.1673	rs2131006	G	A	-0.0926	0.01952	3.85e-06	16235
class	class.Bacilli.id.1673	rs2559847	T	C	-0.10275	0.02186	3.9e-06	16159
class	class.Bacilli.id.1673	rs11835118	T	C	-0.10187	0.02164	4.03e-06	16159
class	class.Bacilli.id.1673	rs2952228	T	C	-0.05603	0.01228	4.11e-06	17506
class	class.Bacilli.id.1673	rs11110283	A	C	-0.10356	0.02206	4.12e-06	16048
class	class.Bacilli.id.1673	rs78017832	T	G	-0.10369	0.02203	4.14e-06	16048
class	class.Bacilli.id.1673	rs12644214	G	C	-0.07286	0.01547	4.27e-06	17396
class	class.Bacilli.id.1673	rs11837200	C	T	-0.10153	0.02164	4.33e-06	16159
class	class.Bacilli.id.1673	rs11110268	C	T	-0.10337	0.02203	4.43e-06	16048
class	class.Bacilli.id.1673	rs9445784	T	C	-0.0995	0.02167	4.45e-06	16649
class	class.Bacilli.id.1673	rs12595929	T	C	0.05695	0.01262	4.59e-06	17510
class	class.Bacilli.id.1673	rs7689028	A	T	-0.05197	0.01133	4.86e-06	17508
class	class.Bacilli.id.1673	rs694949	A	G	-0.08245	0.01792	5e-06	16733
class	class.Bacilli.id.1673	rs12371930	A	G	-0.10627	0.02303	5.11e-06	15672
class	class.Bacilli.id.1673	rs11249980	T	C	-0.05583	0.0123	5.14e-06	17510
class	class.Bacilli.id.1673	rs9669453	A	G	-0.10185	0.02186	5.24e-06	16159
class	class.Bacilli.id.1673	rs2975647	A	G	-0.05542	0.01228	5.41e-06	17506
class	class.Bacilli.id.1673	rs11110264	G	A	-0.10276	0.02209	5.42e-06	16045
class	class.Bacilli.id.1673	rs12797734	T	C	0.05768	0.01263	5.58e-06	17035
class	class.Bacilli.id.1673	rs117905191	A	G	-0.1023	0.02203	5.61e-06	16048
class	class.Bacilli.id.1673	rs2975655	A	G	-0.05547	0.01229	5.74e-06	17510
class	class.Bacilli.id.1673	rs11110158	A	G	-0.10394	0.02266	5.96e-06	16046
class	class.Bacilli.id.1673	rs4260895	C	A	-0.0543	0.01223	5.97e-06	17510
class	class.Bacilli.id.1673	rs2370083	G	T	-0.08119	0.018	5.98e-06	17398
class	class.Bacilli.id.1673	rs13379080	C	T	-0.08117	0.01799	5.99e-06	17399
class	class.Bacilli.id.1673	rs11110288	T	C	-0.10054	0.02175	6.07e-06	16159
class	class.Bacilli.id.1673	rs2975649	T	C	-0.05513	0.01228	6.1e-06	17499
class	class.Bacilli.id.1673	rs17030005	T	C	-0.10112	0.02186	6.15e-06	16159
class	class.Bacilli.id.1673	rs11097541	A	G	-0.05183	0.01143	6.27e-06	17509
class	class.Bacilli.id.1673	rs17030023	T	A	-0.10096	0.02186	6.42e-06	16159
class	class.Bacilli.id.1673	rs11932798	T	C	-0.05133	0.01133	6.54e-06	17509
class	class.Bacilli.id.1673	rs28564647	T	G	-0.06152	0.01371	6.73e-06	17501
class	class.Bacilli.id.1673	rs7313123	C	T	-0.08926	0.01955	6.74e-06	16734
class	class.Bacilli.id.1673	rs78843973	T	C	-0.10128	0.02203	6.83e-06	16048
class	class.Bacilli.id.1673	rs7764486	G	A	-0.09834	0.02165	6.89e-06	16652
class	class.Bacilli.id.1673	rs4374023	A	G	-0.10026	0.02178	6.91e-06	16156
class	class.Bacilli.id.1673	rs75132655	G	T	-0.08909	0.01955	7.08e-06	16734
class	class.Bacilli.id.1673	rs2952183	T	C	-0.06569	0.01501	7.17e-06	17509
class	class.Bacilli.id.1673	rs2952262	A	T	-0.05496	0.01231	7.18e-06	17507
class	class.Bacilli.id.1673	rs2271029	A	C	0.04919	0.01095	7.28e-06	17510
class	class.Bacilli.id.1673	rs2975654	A	G	-0.05494	0.0123	7.3e-06	17510
class	class.Bacilli.id.1673	rs7666190	C	A	-0.10412	0.02467	7.6e-06	10569
class	class.Bacilli.id.1673	rs694954	T	C	-0.08064	0.01788	7.64e-06	16733
class	class.Bacilli.id.1673	rs11726025	A	G	-0.10429	0.02469	7.65e-06	10569
class	class.Bacilli.id.1673	rs2952168	C	G	-0.05498	0.01234	7.69e-06	17399
class	class.Bacilli.id.1673	rs17151854	T	G	-0.06816	0.01576	7.7e-06	17510
class	class.Bacilli.id.1673	rs574104	G	T	-0.07901	0.01762	7.84e-06	16719
class	class.Bacilli.id.1673	rs2952257	C	T	-0.05442	0.01228	7.87e-06	17506
class	class.Bacilli.id.1673	rs2975653	A	G	-0.0544	0.01228	8.08e-06	17506
class	class.Bacilli.id.1673	rs2952258	T	C	-0.05438	0.01228	8.18e-06	17506
class	class.Bacilli.id.1673	rs78367981	C	G	-0.09915	0.02175	8.2e-06	16159
class	class.Bacilli.id.1673	rs2370086	G	T	-0.0796	0.01798	8.27e-06	17398
class	class.Bacilli.id.1673	rs6815078	C	T	-0.05073	0.01133	8.28e-06	17502
class	class.Bacilli.id.1673	rs116878826	C	T	-0.0993	0.0218	8.37e-06	16044
class	class.Bacilli.id.1673	rs3911531	C	T	-0.05986	0.01348	8.53e-06	17504
class	class.Bacilli.id.1673	rs11097542	T	C	-0.0514	0.01147	8.6e-06	17508
class	class.Bacilli.id.1673	rs10034695	C	T	-0.10451	0.02466	8.63e-06	10569
class	class.Bacilli.id.1673	rs17851246	A	G	-0.09962	0.02188	8.63e-06	16048
class	class.Bacilli.id.1673	rs11576960	C	T	-0.0649	0.01467	8.64e-06	17497
class	class.Bacilli.id.1673	rs9345899	A	G	-0.07917	0.01748	8.66e-06	16733
class	class.Bacilli.id.1673	rs7138882	G	A	-0.09887	0.02175	8.72e-06	16159
class	class.Bacilli.id.1673	rs12370758	C	T	-0.10065	0.0221	8.76e-06	16045
class	class.Bacilli.id.1673	rs28491054	G	A	-0.06514	0.01501	8.76e-06	17502
class	class.Bacilli.id.1673	rs79728246	C	T	-0.09884	0.02173	8.83e-06	16159
class	class.Bacilli.id.1673	rs12372388	A	G	-0.09881	0.02175	8.84e-06	16159
class	class.Bacilli.id.1673	rs7187700	A	G	0.05549	0.01262	8.96e-06	17510
class	class.Bacilli.id.1673	rs4968759	A	G	-0.04805	0.01085	9.14e-06	17507
class	class.Bacilli.id.1673	rs7627280	C	T	0.05083	0.01142	9.15e-06	17508
class	class.Bacilli.id.1673	rs689314	T	G	-0.07912	0.01773	9.15e-06	16720
class	class.Bacilli.id.1673	rs4459992	T	C	0.05147	0.01159	9.31e-06	17495
class	class.Bacilli.id.1673	rs79412464	A	C	-0.08355	0.01839	9.35e-06	16423
class	class.Bacilli.id.1673	rs6825077	G	T	-0.10858	0.02536	9.38e-06	9909
class	class.Bacilli.id.1673	rs117585280	A	T	-0.10014	0.02211	9.68e-06	16045
class	class.Bacteroidia.id.912	rs55773148	G	A	-0.1188	0.02356	6.55e-07	11482
class	class.Bacteroidia.id.912	rs55993203	A	G	-0.1188	0.02356	6.55e-07	11482
class	class.Bacteroidia.id.912	rs7631304	G	A	-0.06489	0.01326	6.83e-07	18467
class	class.Bacteroidia.id.912	rs73512608	G	A	-0.11866	0.02356	6.84e-07	11482
class	class.Bacteroidia.id.912	rs73846128	A	G	-0.06516	0.01331	7.15e-07	18467
class	class.Bacteroidia.id.912	rs56358950	C	T	-0.11872	0.02356	7.49e-07	11482
class	class.Bacteroidia.id.912	rs60610351	A	T	-0.1181	0.02356	8.11e-07	11482
class	class.Bacteroidia.id.912	rs58269684	T	C	-0.11792	0.02356	8.74e-07	11482
class	class.Bacteroidia.id.912	rs74090639	A	G	-0.11785	0.02356	9.3e-07	11482
class	class.Bacteroidia.id.912	rs11929346	C	T	-0.06405	0.01325	9.65e-07	18467
class	class.Bacteroidia.id.912	rs35800684	A	G	-0.0639	0.01325	1.01e-06	18467
class	class.Bacteroidia.id.912	rs60614038	A	T	-0.11709	0.02356	1.05e-06	11482
class	class.Bacteroidia.id.912	rs58298316	G	T	-0.11709	0.02356	1.05e-06	11482
class	class.Bacteroidia.id.912	rs17085771	T	A	-0.11722	0.02354	1.05e-06	11482
class	class.Bacteroidia.id.912	rs7611599	T	C	-0.06354	0.01326	1.14e-06	18467
class	class.Bacteroidia.id.912	rs2210451	G	C	-0.11615	0.02357	1.16e-06	11482
class	class.Bacteroidia.id.912	rs9788409	C	T	-0.11663	0.02354	1.17e-06	11482
class	class.Bacteroidia.id.912	rs74937713	T	A	-0.06346	0.01319	1.18e-06	18459
class	class.Bacteroidia.id.912	rs2150960	C	G	-0.11598	0.02357	1.18e-06	11482
class	class.Bacteroidia.id.912	rs112343530	C	T	-0.11546	0.02357	1.21e-06	11482
class	class.Bacteroidia.id.912	rs73975615	G	A	-0.20702	0.04426	1.21e-06	3350
class	class.Bacteroidia.id.912	rs2210454	T	C	-0.11595	0.02357	1.27e-06	11482
class	class.Bacteroidia.id.912	rs7629132	T	C	-0.0632	0.01319	1.29e-06	18458
class	class.Bacteroidia.id.912	rs74090627	T	C	-0.11564	0.02357	1.31e-06	11482
class	class.Bacteroidia.id.912	rs56949730	G	A	-0.11554	0.02357	1.32e-06	11482
class	class.Bacteroidia.id.912	rs112675712	C	T	-0.11471	0.02357	1.34e-06	11482
class	class.Bacteroidia.id.912	rs80015632	G	C	-0.11545	0.02357	1.36e-06	11482
class	class.Bacteroidia.id.912	rs7337863	A	C	-0.11463	0.02375	1.36e-06	11482
class	class.Bacteroidia.id.912	rs12938514	A	G	-0.19998	0.0416	1.42e-06	3350
class	class.Bacteroidia.id.912	rs12486528	A	G	-0.06366	0.01339	1.45e-06	18467
class	class.Bacteroidia.id.912	rs11920519	G	A	-0.06282	0.01317	1.49e-06	18464
class	class.Bacteroidia.id.912	rs17085818	C	A	-0.11538	0.02353	1.49e-06	11482
class	class.Bacteroidia.id.912	rs2210452	A	G	-0.11482	0.02357	1.5e-06	11482
class	class.Bacteroidia.id.912	rs73846120	G	A	-0.06313	0.01331	1.53e-06	18467
class	class.Bacteroidia.id.912	rs11916046	A	C	-0.06275	0.0132	1.57e-06	18467
class	class.Bacteroidia.id.912	rs17085798	A	C	-0.11476	0.02354	1.6e-06	11482
class	class.Bacteroidia.id.912	rs111845179	T	C	0.10044	0.02133	1.66e-06	16526
class	class.Bacteroidia.id.912	rs36076607	C	T	-0.06217	0.01314	1.66e-06	18467
class	class.Bacteroidia.id.912	rs1996069	C	T	-0.06292	0.01329	1.69e-06	18467
class	class.Bacteroidia.id.912	rs71322866	C	A	-0.06287	0.0133	1.71e-06	18467
class	class.Bacteroidia.id.912	rs35532963	G	C	-0.06238	0.01318	1.76e-06	18456
class	class.Bacteroidia.id.912	rs34519192	G	A	-0.06224	0.01318	1.83e-06	18456
class	class.Bacteroidia.id.912	rs11871360	G	A	-0.20286	0.04418	1.86e-06	3350
class	class.Bacteroidia.id.912	rs6794198	T	C	-0.06222	0.01323	1.86e-06	18456
class	class.Bacteroidia.id.912	rs34922683	T	G	-0.06217	0.01321	2.04e-06	18467
class	class.Bacteroidia.id.912	rs907713	C	A	-0.06232	0.0133	2.05e-06	18467
class	class.Bacteroidia.id.912	rs2032750	T	C	-0.05048	0.01064	2.08e-06	17986
class	class.Bacteroidia.id.912	rs11916939	A	G	-0.06201	0.01321	2.1e-06	18467
class	class.Bacteroidia.id.912	rs2346325	G	A	-0.06197	0.01319	2.1e-06	18467
class	class.Bacteroidia.id.912	rs71322864	A	C	-0.06188	0.01323	2.12e-06	18456
class	class.Bacteroidia.id.912	rs1040016	T	G	-0.06194	0.01319	2.13e-06	18467
class	class.Bacteroidia.id.912	rs3946805	G	A	-0.06171	0.01319	2.28e-06	18467
class	class.Bacteroidia.id.912	rs2346324	G	A	-0.06174	0.01319	2.29e-06	18467
class	class.Bacteroidia.id.912	rs35176045	T	C	-0.06161	0.01326	2.31e-06	18467
class	class.Bacteroidia.id.912	rs34046877	C	T	-0.06153	0.01321	2.34e-06	18456
class	class.Bacteroidia.id.912	rs2225529	T	C	-0.11268	0.02375	2.35e-06	11474
class	class.Bacteroidia.id.912	rs4474577	A	G	-0.11538	0.02428	2.43e-06	11001
class	class.Bacteroidia.id.912	rs60660711	A	G	-0.1124	0.0237	2.47e-06	11480
class	class.Bacteroidia.id.912	rs12496485	A	G	-0.06191	0.01332	2.49e-06	18467
class	class.Bacteroidia.id.912	rs7338117	G	A	-0.11226	0.02374	2.57e-06	11482
class	class.Bacteroidia.id.912	rs13100590	C	T	-0.06137	0.01319	2.63e-06	18467
class	class.Bacteroidia.id.912	rs17085738	G	T	-0.11223	0.02373	2.65e-06	11482
class	class.Bacteroidia.id.912	rs17085746	G	A	-0.11223	0.02373	2.65e-06	11482
class	class.Bacteroidia.id.912	rs73510191	C	A	-0.11251	0.02358	2.67e-06	11479
class	class.Bacteroidia.id.912	rs56335733	T	C	-0.11265	0.02373	2.68e-06	11482
class	class.Bacteroidia.id.912	rs73510178	A	G	-0.11205	0.02375	2.71e-06	11482
class	class.Bacteroidia.id.912	rs17026821	C	T	-0.06128	0.01319	2.71e-06	18467
class	class.Bacteroidia.id.912	rs13060907	A	G	-0.06128	0.01324	2.78e-06	18465
class	class.Bacteroidia.id.912	rs7546249	T	A	-0.05516	0.0118	2.83e-06	18466
class	class.Bacteroidia.id.912	rs61070599	T	C	-0.11194	0.02373	2.94e-06	11482
class	class.Bacteroidia.id.912	rs6777119	C	T	-0.061	0.01319	2.94e-06	18467
class	class.Bacteroidia.id.912	rs6791217	T	G	-0.06108	0.01325	3.01e-06	18465
class	class.Bacteroidia.id.912	rs60722059	G	A	-0.11137	0.02375	3.03e-06	11482
class	class.Bacteroidia.id.912	rs17026797	T	G	-0.06104	0.01321	3.12e-06	18465
class	class.Bacteroidia.id.912	rs60869989	A	G	-0.11155	0.02373	3.14e-06	11482
class	class.Bacteroidia.id.912	rs73512626	A	C	-0.11135	0.02371	3.26e-06	11482
class	class.Bacteroidia.id.912	rs74090631	G	A	-0.11096	0.02375	3.38e-06	11482
class	class.Bacteroidia.id.912	rs73510184	T	C	-0.11096	0.02375	3.38e-06	11482
class	class.Bacteroidia.id.912	rs61289215	T	C	-0.1112	0.02373	3.53e-06	11482
class	class.Bacteroidia.id.912	rs13097740	A	G	-0.06015	0.01321	3.55e-06	18465
class	class.Bacteroidia.id.912	rs1996068	G	A	-0.06055	0.01319	3.64e-06	18465
class	class.Bacteroidia.id.912	rs35665203	C	T	-0.06082	0.01332	3.66e-06	18467
class	class.Bacteroidia.id.912	rs74090626	G	A	-0.11055	0.02375	3.7e-06	11482
class	class.Bacteroidia.id.912	rs60814075	T	C	-0.11046	0.02374	3.71e-06	11482
class	class.Bacteroidia.id.912	rs7337151	C	A	-0.11051	0.02375	3.77e-06	11482
class	class.Bacteroidia.id.912	rs1888900	C	T	-0.11087	0.02357	3.79e-06	11482
class	class.Bacteroidia.id.912	rs60475411	C	T	-0.06021	0.01316	3.79e-06	18456
class	class.Bacteroidia.id.912	rs60954548	G	A	-0.11072	0.02371	3.82e-06	11482
class	class.Bacteroidia.id.912	rs7320487	C	T	-0.10975	0.02374	3.98e-06	11482
class	class.Bacteroidia.id.912	rs7319197	G	A	-0.10973	0.02373	3.98e-06	11482
class	class.Bacteroidia.id.912	rs34986288	A	G	-0.06085	0.01349	4.02e-06	18462
class	class.Bacteroidia.id.912	rs1014718	A	G	-0.05467	0.01187	4.04e-06	18467
class	class.Bacteroidia.id.912	rs7491419	G	T	-0.11025	0.02375	4.06e-06	11482
class	class.Bacteroidia.id.912	rs1325597	T	G	-0.05445	0.01185	4.09e-06	18467
class	class.Bacteroidia.id.912	rs1555070	T	C	-0.05443	0.01184	4.22e-06	18462
class	class.Bacteroidia.id.912	rs17085756	A	G	-0.11014	0.02372	4.27e-06	11482
class	class.Bacteroidia.id.912	rs17085776	G	A	-0.1102	0.02371	4.29e-06	11482
class	class.Bacteroidia.id.912	rs71322865	T	C	-0.05926	0.01314	4.3e-06	18467
class	class.Bacteroidia.id.912	rs74090642	G	A	-0.11015	0.02373	4.36e-06	11482
class	class.Bacteroidia.id.912	rs75808613	A	G	-0.10963	0.02375	4.5e-06	11482
class	class.Bacteroidia.id.912	rs78745799	T	G	-0.10963	0.02375	4.5e-06	11482
class	class.Bacteroidia.id.912	rs1022523	G	A	-0.0541	0.01181	4.51e-06	18466
class	class.Bacteroidia.id.912	rs73846124	A	G	-0.05978	0.01326	4.55e-06	18467
class	class.Bacteroidia.id.912	rs17085765	C	G	-0.10992	0.02372	4.56e-06	11482
class	class.Bacteroidia.id.912	rs17085785	T	C	-0.10959	0.02371	4.7e-06	11482
class	class.Bacteroidia.id.912	rs929878	C	T	-0.05465	0.01211	4.75e-06	18467
class	class.Bacteroidia.id.912	rs2183908	C	T	-0.10879	0.02374	4.84e-06	11482
class	class.Bacteroidia.id.912	rs17085809	G	A	-0.1091	0.0237	5e-06	11482
class	class.Bacteroidia.id.912	rs17085791	C	G	-0.10876	0.02371	5.29e-06	11482
class	class.Bacteroidia.id.912	rs2875575	C	G	-0.10903	0.02359	5.47e-06	11482
class	class.Bacteroidia.id.912	rs13291169	C	G	0.06718	0.01481	5.71e-06	17646
class	class.Bacteroidia.id.912	rs59082732	G	T	-0.10893	0.02371	5.99e-06	11482
class	class.Bacteroidia.id.912	rs1888899	T	C	-0.10888	0.02358	5.99e-06	11482
class	class.Bacteroidia.id.912	rs2138406	T	G	0.05855	0.01312	6.25e-06	18466
class	class.Bacteroidia.id.912	rs13291434	T	C	0.06765	0.01491	6.51e-06	17533
class	class.Bacteroidia.id.912	rs17343978	A	C	-0.0556	0.01198	6.61e-06	18467
class	class.Bacteroidia.id.912	rs73510192	C	T	-0.10849	0.02406	6.71e-06	11001
class	class.Bacteroidia.id.912	rs73975618	G	A	-0.18899	0.0428	6.9e-06	3350
class	class.Bacteroidia.id.912	rs73510188	A	G	-0.10761	0.02406	7.6e-06	11001
class	class.Bacteroidia.id.912	rs73510190	C	G	-0.10761	0.02406	7.6e-06	11001
class	class.Bacteroidia.id.912	rs72706335	T	C	-0.22241	0.04935	7.66e-06	3819
class	class.Bacteroidia.id.912	rs7157380	C	G	0.0939	0.02123	7.81e-06	17430
class	class.Bacteroidia.id.912	rs12486971	C	T	-0.05966	0.01358	7.84e-06	18460
class	class.Bacteroidia.id.912	rs7857688	A	G	0.06216	0.014	7.97e-06	17656
class	class.Bacteroidia.id.912	rs11146701	A	G	0.04682	0.0105	8.33e-06	18353
class	class.Bacteroidia.id.912	rs9812599	C	A	-0.06357	0.01426	8.35e-06	17986
class	class.Bacteroidia.id.912	rs10451505	A	G	-0.05267	0.01221	8.48e-06	17986
class	class.Bacteroidia.id.912	rs62531359	T	G	0.06539	0.01493	8.95e-06	18453
class	class.Bacteroidia.id.912	rs79037	A	G	-0.05478	0.01198	8.98e-06	18467
class	class.Bacteroidia.id.912	rs9648077	T	C	-0.04748	0.0107	9.62e-06	18463
class	class.Bacteroidia.id.912	rs2363574	C	T	-0.22274	0.05081	9.93e-06	3061
class	class.Betaproteobacteria.id.2867	rs4033856	C	T	0.08433	0.01667	3.28e-07	16071
class	class.Betaproteobacteria.id.2867	rs2367850	G	C	0.06491	0.01299	5.75e-07	16843
class	class.Betaproteobacteria.id.2867	rs12467854	G	C	0.06502	0.01313	7.12e-07	17164
class	class.Betaproteobacteria.id.2867	rs6087811	T	G	-0.09647	0.01977	9.44e-07	16310
class	class.Betaproteobacteria.id.2867	rs62191117	A	G	0.06441	0.01318	9.47e-07	17155
class	class.Betaproteobacteria.id.2867	rs4511740	G	A	0.06241	0.01277	1.01e-06	17276
class	class.Betaproteobacteria.id.2867	rs78428620	T	C	-0.09677	0.02023	1.61e-06	16311
class	class.Betaproteobacteria.id.2867	rs11679161	T	C	0.0625	0.0131	1.66e-06	17169
class	class.Betaproteobacteria.id.2867	rs11683769	T	A	0.06252	0.01311	1.66e-06	17169
class	class.Betaproteobacteria.id.2867	rs62395635	T	C	0.11166	0.02353	1.72e-06	15234
class	class.Betaproteobacteria.id.2867	rs2613606	C	T	-0.05114	0.01087	2.18e-06	17272
class	class.Betaproteobacteria.id.2867	rs1859743	T	C	-0.05124	0.01093	2.21e-06	17169
class	class.Betaproteobacteria.id.2867	rs1928341	A	G	0.05199	0.011	2.39e-06	17276
class	class.Betaproteobacteria.id.2867	rs36119524	T	C	0.06226	0.01329	2.58e-06	17168
class	class.Betaproteobacteria.id.2867	rs72747231	C	G	-0.13374	0.02879	2.79e-06	11470
class	class.Betaproteobacteria.id.2867	rs4591362	A	G	0.06235	0.01342	2.81e-06	17169
class	class.Betaproteobacteria.id.2867	rs10788864	T	A	0.05154	0.01101	2.81e-06	17268
class	class.Betaproteobacteria.id.2867	rs4507125	C	A	0.06136	0.01316	3.14e-06	17275
class	class.Betaproteobacteria.id.2867	rs11128180	A	G	0.05942	0.01283	3.23e-06	17277
class	class.Betaproteobacteria.id.2867	rs10047202	T	C	0.05128	0.011	3.27e-06	17276
class	class.Betaproteobacteria.id.2867	rs2321387	G	A	-0.05049	0.0109	3.42e-06	17275
class	class.Betaproteobacteria.id.2867	rs2528680	T	C	-0.05014	0.01087	3.44e-06	17277
class	class.Betaproteobacteria.id.2867	rs1122678	C	T	-0.05014	0.01087	3.47e-06	17277
class	class.Betaproteobacteria.id.2867	rs12477314	T	C	0.06176	0.01342	3.51e-06	17169
class	class.Betaproteobacteria.id.2867	rs7638039	T	C	0.05844	0.01261	3.75e-06	17258
class	class.Betaproteobacteria.id.2867	rs2094636	G	C	0.05085	0.011	3.79e-06	17276
class	class.Betaproteobacteria.id.2867	rs1410861	G	A	0.05089	0.011	3.88e-06	17276
class	class.Betaproteobacteria.id.2867	rs62191106	T	C	0.06162	0.0134	3.92e-06	17168
class	class.Betaproteobacteria.id.2867	rs62191107	C	T	0.06162	0.0134	3.94e-06	17168
class	class.Betaproteobacteria.id.2867	rs2528681	C	G	-0.0497	0.01087	4.18e-06	17277
class	class.Betaproteobacteria.id.2867	rs1544475	T	C	-0.04981	0.0109	4.23e-06	17277
class	class.Betaproteobacteria.id.2867	rs6686895	G	A	0.05067	0.011	4.27e-06	17275
class	class.Betaproteobacteria.id.2867	rs2040996	T	C	-0.04977	0.01087	4.35e-06	17268
class	class.Betaproteobacteria.id.2867	rs976935	A	C	-0.04954	0.01087	4.51e-06	17270
class	class.Betaproteobacteria.id.2867	rs34177861	A	G	0.06079	0.0134	4.53e-06	17168
class	class.Betaproteobacteria.id.2867	rs2528678	T	C	-0.04958	0.0109	4.65e-06	17277
class	class.Betaproteobacteria.id.2867	rs12867878	A	G	-0.05084	0.01118	4.7e-06	17277
class	class.Betaproteobacteria.id.2867	rs1511453	A	G	0.09194	0.01984	4.82e-06	17211
class	class.Betaproteobacteria.id.2867	rs17419034	C	A	0.08073	0.01861	5.1e-06	16669
class	class.Betaproteobacteria.id.2867	rs8119189	A	C	-0.09173	0.02018	5.2e-06	16311
class	class.Betaproteobacteria.id.2867	rs4521068	A	G	0.06014	0.01326	5.41e-06	17169
class	class.Betaproteobacteria.id.2867	rs56104821	A	C	0.05812	0.01277	5.48e-06	17273
class	class.Betaproteobacteria.id.2867	rs9537878	A	G	-0.04942	0.01092	5.6e-06	17277
class	class.Betaproteobacteria.id.2867	rs9964679	A	G	0.05236	0.01144	5.62e-06	17277
class	class.Betaproteobacteria.id.2867	rs56386628	C	T	-0.06208	0.01352	5.69e-06	17273
class	class.Betaproteobacteria.id.2867	rs11124193	G	A	0.06054	0.0134	5.93e-06	17168
class	class.Betaproteobacteria.id.2867	rs6087810	T	C	-0.0915	0.02024	6e-06	16310
class	class.Betaproteobacteria.id.2867	rs7326330	C	T	-0.04921	0.01092	6.07e-06	17277
class	class.Betaproteobacteria.id.2867	rs1419746	A	G	-0.04883	0.01087	6.18e-06	17272
class	class.Betaproteobacteria.id.2867	rs7324740	G	A	-0.05053	0.01123	6.19e-06	17276
class	class.Betaproteobacteria.id.2867	rs2528688	A	G	-0.04883	0.01088	6.39e-06	17276
class	class.Betaproteobacteria.id.2867	rs2528679	C	T	-0.04886	0.01089	6.44e-06	17277
class	class.Betaproteobacteria.id.2867	rs76625259	G	T	-0.08967	0.01995	6.48e-06	16311
class	class.Betaproteobacteria.id.2867	rs7988877	A	T	-0.04989	0.01114	6.79e-06	16843
class	class.Betaproteobacteria.id.2867	rs7253477	G	T	0.21094	0.04726	6.8e-06	4336
class	class.Betaproteobacteria.id.2867	rs2906622	C	T	-0.04869	0.01087	6.82e-06	17270
class	class.Betaproteobacteria.id.2867	rs1926544	C	A	-0.04892	0.01092	6.96e-06	17277
class	class.Betaproteobacteria.id.2867	rs4308141	G	C	0.06017	0.0134	7.28e-06	17168
class	class.Betaproteobacteria.id.2867	rs1036449	T	C	-0.04875	0.01092	7.42e-06	17275
class	class.Betaproteobacteria.id.2867	rs1581853	A	G	-0.04965	0.01114	7.46e-06	16843
class	class.Betaproteobacteria.id.2867	rs9537883	T	G	-0.04875	0.01092	7.5e-06	17277
class	class.Betaproteobacteria.id.2867	rs9520346	C	G	0.14241	0.03326	7.59e-06	4797
class	class.Betaproteobacteria.id.2867	rs2528684	C	T	-0.04833	0.01087	7.62e-06	17270
class	class.Betaproteobacteria.id.2867	rs2613608	A	G	-0.04834	0.01088	7.76e-06	17276
class	class.Betaproteobacteria.id.2867	rs9537886	A	C	-0.04862	0.01092	8.09e-06	17274
class	class.Betaproteobacteria.id.2867	rs9527747	G	C	-0.04839	0.01092	8.63e-06	17277
class	class.Betaproteobacteria.id.2867	rs34203874	T	C	0.08965	0.01984	8.64e-06	17211
class	class.Betaproteobacteria.id.2867	rs320161	A	G	0.05657	0.01257	8.66e-06	17161
class	class.Betaproteobacteria.id.2867	rs6787389	C	T	0.09028	0.01962	8.71e-06	16539
class	class.Betaproteobacteria.id.2867	rs74929475	T	G	0.10038	0.02219	8.83e-06	15512
class	class.Betaproteobacteria.id.2867	rs7322915	T	A	-0.04934	0.01118	8.97e-06	17277
class	class.Betaproteobacteria.id.2867	rs9537916	A	G	-0.04921	0.01114	9.06e-06	16843
class	class.Betaproteobacteria.id.2867	rs9537872	G	A	-0.04825	0.01092	9.08e-06	17276
class	class.Betaproteobacteria.id.2867	rs9537885	A	G	-0.04832	0.01092	9.19e-06	17274
[truncated: 11,763 more rows]

## Sheet: Supplemental Table 3
Supplemental Table 3. Sensitive analysis and MR Steiger directionality test of identified bacterial taxa with psychiatric disorders/traits
Bacterial taxa (exposure)	Psychiatric disorder/trait (outcome)	No.SNP	Pleiotropy		Heterogenenity		MR steiger directionality
			MR-PRESSO Global P-value	MR-egger P-value	IVW test P-value	MR-egger P-value	correct causal direction	steiger P-value
Species Eubacterium hallii	ADHD	13	0.328	0.277713	0.274138	0.299916	TRUE	9.46116e-49
Family Prevotellaceae	ASD	13	0.743	0.713355	0.693883	0.625261	TRUE	1.09836e-46
Class Betaproteobacteria	BD	16	0.843	0.714985	0.817561	0.76977	TRUE	5.79654e-52
Class Actinobacteria	SCZ	28	0.713	0.568821	0.642083	0.607138	TRUE	6.70959e-133
Order Gastranaerophilales		11	0.974	0.955407	0.971616	0.948423	TRUE	1.62491e-51
Family Christensenellaceae	OCD	10	0.999	0.571801	0.998915	0.999119	TRUE	2.00774e-23
Class Bacteroidia	TS	11	0.919	0.848524	0.883435	0.827692	TRUE	5.49472e-26
Order Bacteroidales		11	0.919	0.848524	0.883435	0.827692	TRUE	5.49472e-26
Phylum Actinobacteria	Extroversion	23	0.524	0.214222	0.477107	0.516653	TRUE	1.67738e-74
Class Actinobacteria		28	0.721	0.420743	0.676243	0.661422	TRUE	1.41892e-108
Genus ChristensenellaceaeR-7		11	0.982	0.602057	0.98773	0.983394	TRUE	6.51651e-34
Genus Ruminococcaceae UCG-010	NEU	8	0.998	0.943678	0.990875	0.977041	TRUE	1.81353e-35
Species Clostridium innocuum		5	0.579	0.833798	0.542081	0.385225	TRUE	2.87737e-24
Species Ruminococcus torques		11	0.223	0.696401	0.194392	0.148968	TRUE	4.83015e-62
Class Methanobacteria	SA	8	0.978	0.589785	0.975654	0.96882	TRUE	2.96376e-34
Order Methanobacteriales		8	0.978	0.589785	0.975654	0.96882	TRUE	2.96376e-34
Family Methanobacteriaceae		8	0.978	0.589785	0.975654	0.96882	TRUE	2.96376e-34
Genus Sellimonas		11	0.999	0.501687	0.999206	0.999612	TRUE	2.77417e-48
Legend
Column	Description
No.SNP	Number of SNPs
ADHD	Attention deficit/hyperactivity disorder
ASD	Autism spectrum disorder
BD	Bipolar disorder
NEU	Neuroticism
OCD	Obsessive-compulsive disorder
SA	Suicide attempts
SCZ	Schizophrenia
TS	Tourette syndrome
The IVW test and the MR-Egger regression show no evidence of heterogeneity.
MR Steiger directionality test implies the true causal associations directionally.

## Sheet: Supplemental Table 4
Supplemental Table 4. Detailed information of instrumental variables of gut microbiota on 15 psychiatric disorders/traits
Bacterial taxa (exposure)	Psychiatric disorder/trait (outcome)	SNP	Chr	Position	A1	A0	Closest gene	Exposure			Outcome
								Beta	SE	P-value	Beta	SE	P-value
species.Eubacteriumhalliigroup.id.11338	ADHD	rs10221257	17	72092361	A	G	RP11-101O21.1	0.04893	0.01104	8.63e-06	0.0343048	0.0133	0.009788
species.Eubacteriumhalliigroup.id.11338	ADHD	rs10501370	11	58040621	C	T	OR10W1	-0.11499	0.02514	5.52e-06	-0.0161981	0.0296	0.5851
species.Eubacteriumhalliigroup.id.11338	ADHD	rs10798999	1	34308917	C	T	CSMD2	0.05988	0.01262	2.64e-06	0.0208049	0.0152	0.1724
species.Eubacteriumhalliigroup.id.11338	ADHD	rs10808115	7	100635375	A	C	MUC12	-0.05097	0.01095	3.26e-06	-0.0231049	0.0134	0.08465
species.Eubacteriumhalliigroup.id.11338	ADHD	rs12532852	7	83752883	C	A	SEMA3A	-0.08019	0.01782	8.26e-06	0.0104039	0.0211	0.6229
species.Eubacteriumhalliigroup.id.11338	ADHD	rs13116360	4	111885431	T	C	MIR297	0.15412	0.02972	2.95e-07	0.0419957	0.0341	0.2179
species.Eubacteriumhalliigroup.id.11338	ADHD	rs138531890	3	195238086	A	G	PPP1R2	0.14981	0.0347	7.83e-06	-0.00480151	0.0331	0.8856
species.Eubacteriumhalliigroup.id.11338	ADHD	rs281379	19	49214274	A	G	MAMSTR	-0.0505	0.01117	6.8e-06	-0.0341981	0.0138	0.01293
species.Eubacteriumhalliigroup.id.11338	ADHD	rs60254196	7	148856720	A	G	ZNF398	-0.05186	0.01114	2.94e-06	0.0108015	0.0152	0.4761
species.Eubacteriumhalliigroup.id.11338	ADHD	rs74018587	15	62014160	C	T	RP11-507B12.1	0.20894	0.04382	3.7e-06	0.0403013	0.0341	0.2373
species.Eubacteriumhalliigroup.id.11338	ADHD	rs78056098	11	123789877	G	T	OR8D4	-0.05083	0.01133	7.37e-06	-0.0171029	0.0138	0.2146
species.Eubacteriumhalliigroup.id.11338	ADHD	rs949971	3	110283389	T	G	U6atac	-0.05445	0.01156	2.5e-06	0.00689617	0.0138	0.6189
species.Eubacteriumhalliigroup.id.11338	ADHD	rs9516218	13	93967288	C	T	GPC6	0.0493	0.01102	8.17e-06	0.0131967	0.0132	0.3203
family.Prevotellaceae.id.960	ASD	rs12057990	1	99470269	C	T	LPPR5	0.06083	0.01317	4.17e-06	0.0322959	0.0157	0.04027
family.Prevotellaceae.id.960	ASD	rs12118202	1	210681370	T	C	HHAT	-0.07301	0.01466	1.07e-06	-0.0182047	0.0168	0.2783
family.Prevotellaceae.id.960	ASD	rs13069367	3	71801830	A	C	EIF4E3	-0.05316	0.01191	9.2e-06	-0.00650109	0.0145	0.6558
family.Prevotellaceae.id.960	ASD	rs148376875	3	170126707	T	G	RP11-469J4.3	0.08073	0.0178	4.4e-06	-0.0270013	0.0229	0.2379
family.Prevotellaceae.id.960	ASD	rs2206482	20	9771109	T	G	PAK7	-0.05619	0.0117	1.59e-06	-0.0138048	0.0139	0.3211
family.Prevotellaceae.id.960	ASD	rs3758087	8	23714609	T	C	STC1	0.05683	0.01242	6.71e-06	0.0178989	0.0151	0.2337
family.Prevotellaceae.id.960	ASD	rs3860225	1	111161677	A	G	KCNA2	0.08185	0.01672	9.19e-07	0.0326995	0.0213	0.1245
family.Prevotellaceae.id.960	ASD	rs4493272	2	118910912	T	C	AC093901.1	-0.06002	0.01175	3.33e-07	-0.0235962	0.014	0.09205
family.Prevotellaceae.id.960	ASD	rs4685827	3	4864877	T	C	AC018816.3	-0.06594	0.01449	5.43e-06	0.0044003	0.0178	0.8063
family.Prevotellaceae.id.960	ASD	rs7252711	19	17460999	A	G	PLVAP	-0.07311	0.01611	6.59e-06	-0.011597	0.0198	0.5583
family.Prevotellaceae.id.960	ASD	rs912860	14	33706908	G	A	NPAS3	-0.22905	0.04831	9.3e-07	-0.0371031	0.0474	0.4343
family.Prevotellaceae.id.960	ASD	rs9586501	13	105075823	G	A	RP11-123H22.1	0.0601	0.01267	1.7e-06	0.0152964	0.0153	0.3178
family.Prevotellaceae.id.960	ASD	rs9958960	18	63018983	G	A	RP11-453M23.1	-0.08957	0.01728	1.74e-07	-0.0430978	0.0203	0.03358
class.Betaproteobacteria.id.2867	BD	rs11128180	3	70592215	A	G	RP11-231I13.2	0.05942	0.01283	3.23e-06	0.0385955	0.0161	0.01666
class.Betaproteobacteria.id.2867	BD	rs1511453	4	23588462	A	G	RP11-380P13.1	0.09194	0.01984	4.82e-06	0.0218985	0.0274	0.4231
class.Betaproteobacteria.id.2867	BD	rs17419034	5	113007517	C	A	YTHDC2	0.08073	0.01861	5.1e-06	-0.00590255	0.0239	0.8059
class.Betaproteobacteria.id.2867	BD	rs1928341	1	153240013	A	G	LOR	0.05199	0.011	2.39e-06	0.0205964	0.0138	0.1358
class.Betaproteobacteria.id.2867	BD	rs2321387	13	58689340	G	A	RP11-538C21.1	-0.05049	0.0109	3.42e-06	-0.0332994	0.0136	0.01396
class.Betaproteobacteria.id.2867	BD	rs2613606	7	111285025	C	T	DOCK4	-0.05114	0.01087	2.18e-06	0.00540458	0.0136	0.6935
class.Betaproteobacteria.id.2867	BD	rs320161	9	104899117	A	G	U6	0.05657	0.01257	8.66e-06	0.0044003	0.0153	0.773
class.Betaproteobacteria.id.2867	BD	rs4033856	4	45642485	C	T	U6	0.08433	0.01667	3.28e-07	0.00409839	0.0212	0.8485
class.Betaproteobacteria.id.2867	BD	rs56104821	3	193463459	A	C	Metazoa_SRP	0.05812	0.01277	5.48e-06	0.0077995	0.0168	0.6438
class.Betaproteobacteria.id.2867	BD	rs56386628	8	112732674	C	T	RP11-58O3.2	-0.06208	0.01352	5.69e-06	-0.0009995	0.0169	0.9508
class.Betaproteobacteria.id.2867	BD	rs6087811	20	30596130	T	G	RN5S481	-0.09647	0.01977	9.44e-07	-0.0217038	0.0264	0.4097
class.Betaproteobacteria.id.2867	BD	rs62191117	2	239900775	A	G	AC114788.1	0.06441	0.01318	9.47e-07	0.0161981	0.0168	0.3355
class.Betaproteobacteria.id.2867	BD	rs62395635	5	173497796	T	C	HMP19	0.11166	0.02353	1.72e-06	0.017496	0.0277	0.5273
class.Betaproteobacteria.id.2867	BD	rs6787389	3	193670290	C	T	RP11-699L21.1	0.09028	0.01962	8.71e-06	-0.00159872	0.0312	0.958
class.Betaproteobacteria.id.2867	BD	rs7253477	19	35486015	G	T	GRAMD1A	0.21094	0.04726	6.8e-06	0.0515038	0.0325	0.1132
class.Betaproteobacteria.id.2867	BD	rs9964679	18	26569901	A	G	U6	0.05236	0.01144	5.62e-06	0.00909848	0.0146	0.5301
class.Actinobacteria.id.419	Extroversion	rs10209482	2	136191314	C	A	ZRANB3	0.09207	0.01598	2.96e-09	-0.0185	0.0087	0.03388
class.Actinobacteria.id.419	Extroversion	rs112084119	7	48091260	T	C	C7orf57	0.06597	0.01501	9.54e-06	-0.0056	0.0078	0.4728
class.Actinobacteria.id.419	Extroversion	rs11655079	17	75348675	T	C	2021-09-09	-0.05649	0.01238	4.61e-06	0.0061	0.0064	0.3416
class.Actinobacteria.id.419	Extroversion	rs11745923	5	475408	G	T	SLC9A3	0.05544	0.01151	2.15e-06	-0.0054	0.0061	0.374
class.Actinobacteria.id.419	Extroversion	rs12049045	1	114665485	A	G	SYT6	0.05257	0.01138	4.26e-06	0.0057	0.0056	0.3106
class.Actinobacteria.id.419	Extroversion	rs134366	22	35567355	G	A	CTA-714B7.5	0.11017	0.02342	2.12e-06	-0.0058	0.0125	0.6402
class.Actinobacteria.id.419	Extroversion	rs1376754	2	161611969	G	A	Metazoa_SRP	0.05168	0.0112	4.47e-06	-0.0001	0.0056	0.9921
class.Actinobacteria.id.419	Extroversion	rs1515761	10	126110032	T	C	OAT	0.07843	0.01691	2.44e-06	0.0141	0.0087	0.1056
class.Actinobacteria.id.419	Extroversion	rs17261772	2	135911422	C	T	RAB3GAP1	0.09126	0.01244	5.86e-13	-0.0188	0.0082	0.02128
class.Actinobacteria.id.419	Extroversion	rs1961273	2	137602926	C	T	THSD7B	0.05895	0.01255	2.72e-06	-0.0051	0.0062	0.4085
class.Actinobacteria.id.419	Extroversion	rs1983357	3	64994295	C	A	ADAMTS9-AS2	0.06227	0.01396	8.78e-06	-0.0014	0.0073	0.8438
class.Actinobacteria.id.419	Extroversion	rs319899	5	104253119	A	G	RP11-6N13.1	0.07337	0.01625	8.2e-06	-0.0016	0.0077	0.8376
class.Actinobacteria.id.419	Extroversion	rs358060	3	55090439	G	T	CACNA2D3	-0.05012	0.01136	9.8e-06	0.0012	0.0056	0.837
class.Actinobacteria.id.419	Extroversion	rs3820794	2	136505546	C	T	UBXN4	0.08745	0.01296	3.63e-11	-0.0122	0.0077	0.1147
class.Actinobacteria.id.419	Extroversion	rs4954556	2	136801201	A	G	AC093391.2	0.1226	0.02474	2.9e-07	-0.0177	0.0172	0.305
class.Actinobacteria.id.419	Extroversion	rs60317558	3	127313596	A	G	TPRA1	-0.08126	0.01823	9.19e-06	-0.0022	0.0094	0.813
class.Actinobacteria.id.419	Extroversion	rs6430601	2	136854537	T	G	CXCR4	0.07598	0.0161	1.01e-06	-0.0081	0.0084	0.3326
class.Actinobacteria.id.419	Extroversion	rs6660520	1	207003553	A	G	IL19	0.0713	0.01339	9.21e-08	-0.0046	0.0065	0.4785
class.Actinobacteria.id.419	Extroversion	rs6716536	2	136787402	T	C	AC093391.2	0.09339	0.01207	2.1e-14	-0.0125	0.0098	0.2022
class.Actinobacteria.id.419	Extroversion	rs6723108	2	135479980	T	G	TMEM163	0.06429	0.01152	6.6e-09	-0.002	0.0061	0.7428
class.Actinobacteria.id.419	Extroversion	rs7003528	8	8436070	T	C	Metazoa_SRP	0.05267	0.01201	9.09e-06	0.0106	0.0078	0.1743
class.Actinobacteria.id.419	Extroversion	rs72767435	15	94852795	T	C	MCTP2	-0.1272	0.02725	1.97e-06	-0.0088	0.0317	0.7818
class.Actinobacteria.id.419	Extroversion	rs72847650	2	137051974	A	C	7SK	-0.0552	0.01178	1.54e-06	0.0103	0.0079	0.1909
class.Actinobacteria.id.419	Extroversion	rs7322849	13	112859829	T	C	RP11-315H15.2	0.09267	0.01924	1.03e-06	-0.0063	0.0109	0.5648
class.Actinobacteria.id.419	Extroversion	rs7732645	5	18017755	C	T	RP11-454P21.1	-0.07733	0.0173	6.57e-06	0.0023	0.009	0.8
class.Actinobacteria.id.419	Extroversion	rs80083040	8	65654844	T	G	CYP7B1	0.15565	0.03452	7.42e-06	0.0144	0.0307	0.64
class.Actinobacteria.id.419	Extroversion	rs8047955	16	81776768	A	G	RP11-960L18.1	0.05736	0.01163	8.32e-07	-0.0122	0.0063	0.05045
class.Actinobacteria.id.419	Extroversion	rs961091	7	95654718	G	A	DYNC1I1	0.05016	0.01121	7.87e-06	-0.0085	0.0055	0.1247
genus.ChristensenellaceaeR.7group.id.11283	Extroversion	rs10461257	4	156131004	A	G	NPY2R	-0.05433	0.01216	8.46e-06	0.0032	0.0078	0.6877
genus.ChristensenellaceaeR.7group.id.11283	Extroversion	rs1416227	10	44015690	C	T	ZNF487P	0.07096	0.01576	7.8e-06	-0.0071	0.0101	0.4843
genus.ChristensenellaceaeR.7group.id.11283	Extroversion	rs16930076	12	26233778	G	T	RASSF8	-0.06745	0.01493	8.03e-06	0.0001	0.0074	0.9933
genus.ChristensenellaceaeR.7group.id.11283	Extroversion	rs17081797	18	67555560	A	G	CD226	-0.08795	0.02034	5.54e-06	0.007	0.0112	0.5334
genus.ChristensenellaceaeR.7group.id.11283	Extroversion	rs60954665	19	35883736	T	G	AC002511.4	0.04955	0.01103	7.34e-06	-0.0058	0.0054	0.2857
genus.ChristensenellaceaeR.7group.id.11283	Extroversion	rs62132810	19	49279227	A	G	U6	-0.08239	0.01793	6.71e-06	0.0079	0.0142	0.5765
genus.ChristensenellaceaeR.7group.id.11283	Extroversion	rs62190261	2	230943099	A	C	SLC16A14	0.09508	0.0214	9.9e-06	-0.0221	0.0115	0.05489
genus.ChristensenellaceaeR.7group.id.11283	Extroversion	rs62467127	7	118096925	C	T	AC006926.1	0.11146	0.02508	5e-06	-0.0168	0.0135	0.2126
genus.ChristensenellaceaeR.7group.id.11283	Extroversion	rs75608046	5	29388561	C	T	CTD-2010I22.2	0.11422	0.02485	8.22e-06	-0.0198	0.0134	0.1391
genus.ChristensenellaceaeR.7group.id.11283	Extroversion	rs78521377	10	126448374	C	T	METTL10	0.12574	0.02725	4.25e-06	-0.0099	0.0133	0.457
genus.ChristensenellaceaeR.7group.id.11283	Extroversion	rs8110909	19	34074433	G	A	CHST8	0.05861	0.01168	4.97e-07	-0.0062	0.006	0.2974
phylum.Actinobacteria.id.400	Extroversion	rs10209482	2	136191314	C	A	ZRANB3	0.06965	0.01516	1.5e-06	-0.0185	0.0087	0.03388
phylum.Actinobacteria.id.400	Extroversion	rs10513350	9	122524437	C	T	RP11-360A18.2	0.09132	0.01971	7.71e-06	-0.005	0.01	0.6165
phylum.Actinobacteria.id.400	Extroversion	rs12528285	6	92775210	C	T	U3	0.08058	0.01801	5.83e-06	0.0031	0.0095	0.7459
phylum.Actinobacteria.id.400	Extroversion	rs13192624	6	113129609	T	C	U6	-0.05214	0.01173	9.1e-06	-0.0065	0.0063	0.3061
phylum.Actinobacteria.id.400	Extroversion	rs1397793	5	90471451	G	A	GPR98	-0.05146	0.01112	4.77e-06	0.0056	0.0061	0.356
phylum.Actinobacteria.id.400	Extroversion	rs1441337	11	13116497	T	C	CTC-497E21.5	0.0506	0.01156	7.53e-06	-0.0087	0.0064	0.1727
phylum.Actinobacteria.id.400	Extroversion	rs17261772	2	135911422	C	T	RAB3GAP1	0.06867	0.01185	1.18e-08	-0.0188	0.0082	0.02128
phylum.Actinobacteria.id.400	Extroversion	rs1879087	2	136822223	C	T	AC068492.1	0.10168	0.02165	2.48e-07	-0.0055	0.0135	0.6841
phylum.Actinobacteria.id.400	Extroversion	rs3820794	2	136505546	C	T	UBXN4	0.06368	0.01231	5e-07	-0.0122	0.0077	0.1147
phylum.Actinobacteria.id.400	Extroversion	rs4429415	2	213756191	C	T	AC093865.1	0.05737	0.01109	2.74e-07	-0.0031	0.0056	0.5731
phylum.Actinobacteria.id.400	Extroversion	rs55888705	4	1517826	A	G	RP11-1398P2.1	0.05299	0.01096	1.47e-06	-0.0047	0.0058	0.42
phylum.Actinobacteria.id.400	Extroversion	rs62448871	7	24465024	C	A	U6	-0.05052	0.01072	2.15e-06	-0.0021	0.0056	0.7073
phylum.Actinobacteria.id.400	Extroversion	rs6430601	2	136854537	T	G	CXCR4	0.06974	0.01526	2.54e-06	-0.0081	0.0084	0.3326
phylum.Actinobacteria.id.400	Extroversion	rs6496870	15	92467422	T	C	SLCO3A1	0.05044	0.01134	5.49e-06	-0.0024	0.0056	0.6741
phylum.Actinobacteria.id.400	Extroversion	rs6716536	2	136787402	T	C	AC093391.2	0.07339	0.0115	2.39e-10	-0.0125	0.0098	0.2022
phylum.Actinobacteria.id.400	Extroversion	rs6723108	2	135479980	T	G	TMEM163	0.05819	0.01099	2.84e-08	-0.002	0.0061	0.7428
phylum.Actinobacteria.id.400	Extroversion	rs74037001	14	23847194	G	A	CMTM5	-0.07965	0.01647	1.21e-06	0.0185	0.0085	0.02983
phylum.Actinobacteria.id.400	Extroversion	rs75211493	19	5300465	G	A	PTPRS	0.0838	0.01842	9.38e-06	-0.0154	0.0123	0.2113
phylum.Actinobacteria.id.400	Extroversion	rs76355910	2	102254623	T	C	MAP4K4	0.05797	0.01314	9.66e-06	0.0026	0.0069	0.7052
phylum.Actinobacteria.id.400	Extroversion	rs80124826	2	239936384	T	C	RP11-648F7.1	-0.12419	0.02786	8.75e-06	0.006	0.0173	0.728
phylum.Actinobacteria.id.400	Extroversion	rs8047955	16	81776768	A	G	RP11-960L18.1	0.05207	0.01108	2.5e-06	-0.0122	0.0063	0.05045
phylum.Actinobacteria.id.400	Extroversion	rs857444	6	14617591	C	T	RP11-330A16.1	0.04971	0.01095	5.52e-06	0.0075	0.0057	0.1856
phylum.Actinobacteria.id.400	Extroversion	rs9833771	3	32362998	T	C	CMTM8	0.04873	0.01062	4.24e-06	-0.0036	0.0062	0.5618
genus.RuminococcaceaeUCG010.id.11367	NEU	rs12597105	16	5233941	G	A	RP11-382N13.2	0.06691	0.01437	4.61e-06	-0.00342818	0.00252258	0.1743
genus.RuminococcaceaeUCG010.id.11367	NEU	rs13119501	4	121623301	T	G	PRDM5	-0.086	0.01938	9.97e-06	0.00472681	0.00366135	0.1967
genus.RuminococcaceaeUCG010.id.11367	NEU	rs2241167	9	130430116	G	A	STXBP1	-0.05518	0.01245	9.52e-06	0.00302805	0.00228188	0.1846
genus.RuminococcaceaeUCG010.id.11367	NEU	rs2820282	6	104728618	A	C	HACE1	-0.05785	0.01253	4.35e-06	0.00216391	0.00236493	0.3602
genus.RuminococcaceaeUCG010.id.11367	NEU	rs682403	9	135968557	A	G	snoU13	-0.05857	0.01241	2.33e-06	0.0022392	0.0022664	0.3231
genus.RuminococcaceaeUCG010.id.11367	NEU	rs6958419	7	16349864	C	T	ISPD	-0.05868	0.01244	2.43e-06	0.00360827	0.00226792	0.1117
genus.RuminococcaceaeUCG010.id.11367	NEU	rs73218807	4	31057482	G	A	PCDH7	-0.16621	0.03679	6.43e-06	0.0074751	0.00541674	0.1675
genus.RuminococcaceaeUCG010.id.11367	NEU	rs7336335	13	110718173	G	A	RP11-472K17.1	0.06245	0.0141	8.79e-06	-0.000450986	0.00260685	0.8627
species.Clostridiuminnocuumgroup.id.14397	NEU	rs10074000	5	113126539	T	C	YTHDC2	-0.09995	0.02251	9.67e-06	-0.00471304	0.00239362	0.04896
species.Clostridiuminnocuumgroup.id.14397	NEU	rs11792329	9	107194171	G	A	OR13F1	0.16453	0.03306	9.17e-07	0.00404537	0.00343119	0.2384
species.Clostridiuminnocuumgroup.id.14397	NEU	rs6890185	5	71186626	T	C	CARTPT	0.11413	0.02306	7.34e-07	0.0011507	0.00246931	0.6414
species.Clostridiuminnocuumgroup.id.14397	NEU	rs72864816	18	6343719	T	G	L3MBTL4	0.15653	0.03253	1.87e-06	0.0047593	0.00345628	0.1685
species.Clostridiuminnocuumgroup.id.14397	NEU	rs73126515	3	63620340	A	G	SYNPR	0.16324	0.0368	7.51e-06	0.0100296	0.00385902	0.009353
species.Ruminococcustorquesgroup.id.14377	NEU	rs10904297	10	4639762	A	G	RP11-117P22.1	-0.1678	0.03898	2.68e-06	0.000616553	0.00550494	0.9105
species.Ruminococcustorquesgroup.id.14377	NEU	rs12434631	14	26130404	A	G	SNORD37	0.07229	0.01529	5.96e-06	-0.00248018	0.00321684	0.4405
species.Ruminococcustorquesgroup.id.14377	NEU	rs158487	5	55576026	A	G	RNU6ATAC2P	0.05291	0.01159	7.76e-06	-0.00363927	0.00248245	0.1427
species.Ruminococcustorquesgroup.id.14377	NEU	rs17118317	12	56520375	C	T	RP11-603J24.5	0.07737	0.01623	1.4e-06	-0.00720092	0.00335082	0.03161
species.Ruminococcustorquesgroup.id.14377	NEU	rs1964825	20	57919516	A	G	AL035250.1	0.05292	0.01208	8.37e-06	-0.0028238	0.00254856	0.268
species.Ruminococcustorquesgroup.id.14377	NEU	rs2239511	19	35831537	A	G	CD22	0.06464	0.0142	8.49e-06	0.00460888	0.00304619	0.1303
species.Ruminococcustorquesgroup.id.14377	NEU	rs35866622	19	49218060	T	C	MAMSTR	-0.06122	0.0109	1.93e-08	0.000850769	0.00233728	0.7159
species.Ruminococcustorquesgroup.id.14377	NEU	rs4073731	11	132663147	T	C	OPCML	0.06314	0.01418	8.31e-06	-0.00686645	0.00309578	0.02657
species.Ruminococcustorquesgroup.id.14377	NEU	rs62449732	7	54783216	T	C	SEC61G	0.07424	0.01669	6.65e-06	-0.00824239	0.00348663	0.0181
species.Ruminococcustorquesgroup.id.14377	NEU	rs77034621	8	76769843	T	G	snoU13	-0.1515	0.03339	5.4e-06	0.00715844	0.00509861	0.1602
species.Ruminococcustorquesgroup.id.14377	NEU	rs8080469	17	14532347	G	A	AC013248.2	0.04806	0.01066	5.07e-06	-0.00161751	0.0022814	0.4786
family.Christensenellaceae.id.1866	OCD	rs117186816	11	123936128	G	A	OR10G7	-0.20648	0.04364	6.52e-06	0.1182	0.0861	0.1697
family.Christensenellaceae.id.1866	OCD	rs13132953	4	46980679	T	G	GABRA4	-0.04992	0.01102	6.1e-06	0.00760104	0.0348	0.8271
family.Christensenellaceae.id.1866	OCD	rs4076564	6	169640257	G	A	THBS2	-0.18862	0.03921	8.06e-06	0.0775	0.0914	0.396
family.Christensenellaceae.id.1866	OCD	rs62573205	9	137786999	G	A	FCN2	-0.06436	0.0133	2.07e-06	0.0154	0.0428	0.7183
family.Christensenellaceae.id.1866	OCD	rs7211194	17	13541941	C	T	RP11-721K1.1	0.04921	0.01105	9.15e-06	-0.0235993	0.035	0.5006
family.Christensenellaceae.id.1866	OCD	rs72706624	9	15518852	G	T	Metazoa_SRP	0.08665	0.01968	8.75e-06	-0.0338022	0.0575	0.5566
family.Christensenellaceae.id.1866	OCD	rs77867022	7	120333701	G	T	KCND2	-0.16044	0.03796	8.81e-06	0.0156996	0.0833	0.8505
family.Christensenellaceae.id.1866	OCD	rs78521377	10	126448374	C	T	METTL10	0.11997	0.02693	8.92e-06	-0.0619978	0.0806	0.4416
family.Christensenellaceae.id.1866	OCD	rs8110909	19	34074433	G	A	CHST8	0.05123	0.01151	7.62e-06	-0.00320486	0.0369	0.9316
family.Christensenellaceae.id.1866	OCD	rs870002	8	62220151	C	T	CLVS1	0.0494	0.01094	4.85e-06	0.00129984	0.0346	0.97
class.Methanobacteria.id.119	SA	rs10202904	2	125440268	T	G	CNTNAP5	-0.12176	0.02354	3.01e-07	0.01511	0.0203	0.4571
class.Methanobacteria.id.119	SA	rs4753222	11	89348133	A	G	RP11-643G5.6	0.11106	0.02505	7.45e-06	-0.01045	0.0212	0.6206
class.Methanobacteria.id.119	SA	rs56131665	5	178160975	G	A	RP11-281O15.3	0.17867	0.0393	6.18e-06	-0.04322	0.0376	0.2495
class.Methanobacteria.id.119	SA	rs62241835	3	15013348	G	T	NR2C2	-0.20336	0.04179	1.63e-06	0.01311	0.0381	0.7299
class.Methanobacteria.id.119	SA	rs6508769	19	28827760	T	C	AC005307.1	0.15352	0.03445	8.23e-06	-0.04018	0.0303	0.184
class.Methanobacteria.id.119	SA	rs73068003	7	10773932	G	T	AC004535.2	-0.15813	0.03518	8.44e-06	0.005584	0.0308	0.8568
class.Methanobacteria.id.119	SA	rs73457410	13	41956181	A	G	NAA16	0.21535	0.04367	1.41e-06	-0.04972	0.0383	0.1944
class.Methanobacteria.id.119	SA	rs75208022	12	21338861	C	T	SLCO1B1	-0.22724	0.04876	5.92e-06	0.05468	0.0355	0.1238
family.Methanobacteriaceae.id.121	SA	rs10202904	2	125440268	T	G	CNTNAP5	-0.12176	0.02354	3.01e-07	0.01511	0.0203	0.4571
family.Methanobacteriaceae.id.121	SA	rs4753222	11	89348133	A	G	RP11-643G5.6	0.11106	0.02505	7.45e-06	-0.01045	0.0212	0.6206
family.Methanobacteriaceae.id.121	SA	rs56131665	5	178160975	G	A	RP11-281O15.3	0.17867	0.0393	6.18e-06	-0.04322	0.0376	0.2495
family.Methanobacteriaceae.id.121	SA	rs62241835	3	15013348	G	T	NR2C2	-0.20336	0.04179	1.63e-06	0.01311	0.0381	0.7299
family.Methanobacteriaceae.id.121	SA	rs6508769	19	28827760	T	C	AC005307.1	0.15352	0.03445	8.23e-06	-0.04018	0.0303	0.184
family.Methanobacteriaceae.id.121	SA	rs73068003	7	10773932	G	T	AC004535.2	-0.15813	0.03518	8.44e-06	0.005584	0.0308	0.8568
family.Methanobacteriaceae.id.121	SA	rs73457410	13	41956181	A	G	NAA16	0.21535	0.04367	1.41e-06	-0.04972	0.0383	0.1944
family.Methanobacteriaceae.id.121	SA	rs75208022	12	21338861	C	T	SLCO1B1	-0.22724	0.04876	5.92e-06	0.05468	0.0355	0.1238
genus.Sellimonas.id.14369	SA	rs113379006	3	42008186	T	C	ULK4	-0.17127	0.03539	2.03e-06	0.01735	0.0288	0.5472
genus.Sellimonas.id.14369	SA	rs17641154	6	120450073	T	C	MIR3144	0.18599	0.04255	9.75e-06	-0.03345	0.034	0.3247
genus.Sellimonas.id.14369	SA	rs2016057	15	52105282	A	C	TMOD2	-0.11805	0.02542	3.86e-06	0.0143	0.0205	0.4868
genus.Sellimonas.id.14369	SA	rs2187447	11	79332972	A	C	RP11-258O13.1	0.2478	0.05241	2.21e-06	-0.06806	0.0462	0.1408
genus.Sellimonas.id.14369	SA	rs2371572	2	213214174	A	C	ERBB4	0.12501	0.0249	5.99e-07	-0.004611	0.0198	0.8149
genus.Sellimonas.id.14369	SA	rs452199	10	55251498	C	T	RN5S318	-0.11807	0.02604	7.86e-06	0.01755	0.0205	0.3906
genus.Sellimonas.id.14369	SA	rs56203279	7	111501524	T	C	DOCK4	-0.12079	0.02671	5.64e-06	0.007373	0.0219	0.7351
genus.Sellimonas.id.14369	SA	rs62016462	15	52485441	T	C	RP11-430B1.2	0.23258	0.04818	1.15e-06	-0.03583	0.0374	0.3382
genus.Sellimonas.id.14369	SA	rs6854114	4	162924622	C	A	FSTL5	0.14398	0.03158	9.91e-06	-0.02184	0.0248	0.3789
genus.Sellimonas.id.14369	SA	rs72553860	1	247579749	G	A	NLRP3	-0.14501	0.03299	9.64e-06	0.01331	0.0272	0.6236
genus.Sellimonas.id.14369	SA	rs73069357	3	41753319	G	T	ULK4	-0.16778	0.03609	3.66e-06	0.01134	0.0292	0.6967
order.Methanobacteriales.id.120	SA	rs10202904	2	125440268	T	G	CNTNAP5	-0.12176	0.02354	3.01e-07	0.01511	0.0203	0.4571
order.Methanobacteriales.id.120	SA	rs4753222	11	89348133	A	G	RP11-643G5.6	0.11106	0.02505	7.45e-06	-0.01045	0.0212	0.6206
order.Methanobacteriales.id.120	SA	rs56131665	5	178160975	G	A	RP11-281O15.3	0.17867	0.0393	6.18e-06	-0.04322	0.0376	0.2495
order.Methanobacteriales.id.120	SA	rs62241835	3	15013348	G	T	NR2C2	-0.20336	0.04179	1.63e-06	0.01311	0.0381	0.7299
order.Methanobacteriales.id.120	SA	rs6508769	19	28827760	T	C	AC005307.1	0.15352	0.03445	8.23e-06	-0.04018	0.0303	0.184
order.Methanobacteriales.id.120	SA	rs73068003	7	10773932	G	T	AC004535.2	-0.15813	0.03518	8.44e-06	0.005584	0.0308	0.8568
order.Methanobacteriales.id.120	SA	rs73457410	13	41956181	A	G	NAA16	0.21535	0.04367	1.41e-06	-0.04972	0.0383	0.1944
order.Methanobacteriales.id.120	SA	rs75208022	12	21338861	C	T	SLCO1B1	-0.22724	0.04876	5.92e-06	0.05468	0.0355	0.1238
class.Actinobacteria.id.419	SCZ	rs10209482	2	136191314	C	A	ZRANB3	0.09207	0.01598	2.96e-09	0.0164038	0.0161	0.3079
class.Actinobacteria.id.419	SCZ	rs112084119	7	48091260	T	C	C7orf57	0.06597	0.01501	9.54e-06	0.0018982	0.0142	0.8957
class.Actinobacteria.id.419	SCZ	rs11655079	17	75348675	T	C	2021-09-09	-0.05649	0.01238	4.61e-06	0.00970278	0.0123	0.4291
class.Actinobacteria.id.419	SCZ	rs11745923	5	475408	G	T	SLC9A3	0.05544	0.01151	2.15e-06	0.0116982	0.0112	0.2971
class.Actinobacteria.id.419	SCZ	rs12049045	1	114665485	A	G	SYT6	0.05257	0.01138	4.26e-06	-0.00500249	0.011	0.6491
class.Actinobacteria.id.419	SCZ	rs134366	22	35567355	G	A	CTA-714B7.5	0.11017	0.02342	2.12e-06	0.0497051	0.0236	0.03562
class.Actinobacteria.id.419	SCZ	rs1376754	2	161611969	G	A	Metazoa_SRP	0.05168	0.0112	4.47e-06	0.00120072	0.0107	0.9101
class.Actinobacteria.id.419	SCZ	rs1515761	10	126110032	T	C	OAT	0.07843	0.01691	2.44e-06	0.00330453	0.0164	0.8392
class.Actinobacteria.id.419	SCZ	rs17261772	2	135911422	C	T	RAB3GAP1	0.09126	0.01244	5.86e-13	0.00810274	0.0128	0.5265
class.Actinobacteria.id.419	SCZ	rs1961273	2	137602926	C	T	THSD7B	0.05895	0.01255	2.72e-06	0.0062998	0.012	0.6021
class.Actinobacteria.id.419	SCZ	rs1983357	3	64994295	C	A	ADAMTS9-AS2	0.06227	0.01396	8.78e-06	0.00120072	0.0136	0.9281
class.Actinobacteria.id.419	SCZ	rs319899	5	104253119	A	G	RP11-6N13.1	0.07337	0.01625	8.2e-06	0.00689617	0.0154	0.6546
class.Actinobacteria.id.419	SCZ	rs358060	3	55090439	G	T	CACNA2D3	-0.05012	0.01136	9.8e-06	-0.014997	0.0111	0.1764
class.Actinobacteria.id.419	SCZ	rs3820794	2	136505546	C	T	UBXN4	0.08745	0.01296	3.63e-11	0.00429923	0.013	0.7417
class.Actinobacteria.id.419	SCZ	rs4954556	2	136801201	A	G	AC093391.2	0.1226	0.02474	2.9e-07	-0.00080032	0.0233	0.9723
class.Actinobacteria.id.419	SCZ	rs60317558	3	127313596	A	G	TPRA1	-0.08126	0.01823	9.19e-06	-0.000500125	0.0183	0.9771
class.Actinobacteria.id.419	SCZ	rs6430601	2	136854537	T	G	CXCR4	0.07598	0.0161	1.01e-06	0.0461963	0.0157	0.003262
class.Actinobacteria.id.419	SCZ	rs6660520	1	207003553	A	G	IL19	0.0713	0.01339	9.21e-08	0.00789872	0.0129	0.5411
class.Actinobacteria.id.419	SCZ	rs6716536	2	136787402	T	C	AC093391.2	0.09339	0.01207	2.1e-14	0.0118989	0.013	0.3588
class.Actinobacteria.id.419	SCZ	rs6723108	2	135479980	T	G	TMEM163	0.06429	0.01152	6.6e-09	0.00649884	0.0116	0.5776
class.Actinobacteria.id.419	SCZ	rs7003528	8	8436070	T	C	Metazoa_SRP	0.05267	0.01201	9.09e-06	0.0271968	0.0132	0.03966
class.Actinobacteria.id.419	SCZ	rs72767435	15	94852795	T	C	MCTP2	-0.1272	0.02725	1.97e-06	0.0385955	0.0335	0.249
class.Actinobacteria.id.419	SCZ	rs72847650	2	137051974	A	C	7SK	-0.0552	0.01178	1.54e-06	-0.00280393	0.0125	0.8234
class.Actinobacteria.id.419	SCZ	rs7322849	13	112859829	T	C	RP11-315H15.2	0.09267	0.01924	1.03e-06	0.0162965	0.0191	0.3926
class.Actinobacteria.id.419	SCZ	rs7732645	5	18017755	C	T	RP11-454P21.1	-0.07733	0.0173	6.57e-06	-0.0271968	0.0169	0.1075
class.Actinobacteria.id.419	SCZ	rs80083040	8	65654844	T	G	CYP7B1	0.15565	0.03452	7.42e-06	0.047103	0.0349	0.177
class.Actinobacteria.id.419	SCZ	rs8047955	16	81776768	A	G	RP11-960L18.1	0.05736	0.01163	8.32e-07	0.0145043	0.0113	0.2004
class.Actinobacteria.id.419	SCZ	rs961091	7	95654718	G	A	DYNC1I1	0.05016	0.01121	7.87e-06	-0.0117013	0.0107	0.2761
order.Gastranaerophilales.id.1591	SCZ	rs1029134	10	85423938	T	G	RP11-344L13.2	0.08817	0.01946	7.12e-06	0.00750179	0.0114	0.5068
order.Gastranaerophilales.id.1591	SCZ	rs10738747	9	26184578	G	A	RP11-33G16.1	0.08424	0.01835	4.55e-06	0.00329542	0.0106	0.7545
order.Gastranaerophilales.id.1591	SCZ	rs11150282	16	80493705	T	C	RP11-525K10.3	0.10093	0.01961	3.16e-07	0.0106036	0.0114	0.3524
order.Gastranaerophilales.id.1591	SCZ	rs113884518	9	24648997	T	C	IZUMO3	-0.20772	0.04532	5.61e-06	-0.0164953	0.0248	0.5059
order.Gastranaerophilales.id.1591	SCZ	rs367480	11	2937631	G	A	SLC22A18	-0.08396	0.0185	7.13e-06	0.00060018	0.0108	0.9584
order.Gastranaerophilales.id.1591	SCZ	rs4129397	9	115975644	G	A	FKBP15	0.0874	0.01843	2.42e-06	0.012599	0.0107	0.2387
order.Gastranaerophilales.id.1591	SCZ	rs72765665	1	230522960	T	C	PGBD5	-0.08775	0.01858	1.88e-06	-0.00930314	0.0108	0.3902
order.Gastranaerophilales.id.1591	SCZ	rs76348635	2	125143642	G	A	CNTNAP5	-0.14495	0.03233	6.57e-06	-0.0361005	0.0188	0.05534
order.Gastranaerophilales.id.1591	SCZ	rs789069	18	1008278	A	C	RP11-78F17.1	-0.10438	0.02336	5.68e-06	-0.0183982	0.0137	0.1778
order.Gastranaerophilales.id.1591	SCZ	rs79790072	15	100747683	T	C	ADAMTS17	0.22295	0.04829	3.65e-06	0.00229736	0.0258	0.9285
order.Gastranaerophilales.id.1591	SCZ	rs9864379	3	14306949	T	C	RP11-536I6.2	-0.16138	0.02919	3.44e-08	-0.0168003	0.0174	0.3331
class.Bacteroidia.id.912	TS	rs1014718	1	176802974	A	G	PAPPA2	-0.05467	0.01187	4.04e-06	0.0452984	0.0298	0.1282
class.Bacteroidia.id.912	TS	rs10451505	19	16843967	A	G	NWD1	-0.05267	0.01221	8.48e-06	0.043701	0.061	0.4738
class.Bacteroidia.id.912	TS	rs13291434	9	116888634	T	C	KIF12	0.06765	0.01491	6.51e-06	-0.0498995	0.0355	0.1601
class.Bacteroidia.id.912	TS	rs2032750	2	53831026	T	C	ASB3	-0.05048	0.01064	2.08e-06	-0.0161995	0.0267	0.5455
class.Bacteroidia.id.912	TS	rs55773148	13	70523029	G	A	KLHL1	-0.1188	0.02356	6.55e-07	0.0537996	0.0599	0.3695
class.Bacteroidia.id.912	TS	rs62531359	8	70916181	T	G	PRDM14	0.06539	0.01493	8.95e-06	0.00679685	0.0388	0.8601
class.Bacteroidia.id.912	TS	rs72706335	1	157495438	T	C	FCRL5	-0.22241	0.04935	7.66e-06	0.0966003	0.0608	0.1123
class.Bacteroidia.id.912	TS	rs73975615	17	6461200	G	A	PITPNM3	-0.20702	0.04426	1.21e-06	0.0239997	0.1355	0.8593
class.Bacteroidia.id.912	TS	rs7631304	3	89339527	G	A	EPHA3	-0.06489	0.01326	6.83e-07	0.0560996	0.0327	0.08665
class.Bacteroidia.id.912	TS	rs9648077	7	43057882	T	C	AC005537.2	-0.04748	0.0107	9.62e-06	0.0339955	0.027	0.209
class.Bacteroidia.id.912	TS	rs9812599	3	64340637	C	A	PRICKLE2	-0.06357	0.01426	8.35e-06	0.0379002	0.0352	0.2821
order.Bacteroidales.id.913	TS	rs1014718	1	176802974	A	G	PAPPA2	-0.05467	0.01187	4.04e-06	0.0452984	0.0298	0.1282
order.Bacteroidales.id.913	TS	rs10451505	19	16843967	A	G	NWD1	-0.05267	0.01221	8.48e-06	0.043701	0.061	0.4738
order.Bacteroidales.id.913	TS	rs13291434	9	116888634	T	C	KIF12	0.06765	0.01491	6.51e-06	-0.0498995	0.0355	0.1601
order.Bacteroidales.id.913	TS	rs2032750	2	53831026	T	C	ASB3	-0.05048	0.01064	2.08e-06	-0.0161995	0.0267	0.5455
order.Bacteroidales.id.913	TS	rs55773148	13	70523029	G	A	KLHL1	-0.1188	0.02356	6.55e-07	0.0537996	0.0599	0.3695
order.Bacteroidales.id.913	TS	rs62531359	8	70916181	T	G	PRDM14	0.06539	0.01493	8.95e-06	0.00679685	0.0388	0.8601
order.Bacteroidales.id.913	TS	rs72706335	1	157495438	T	C	FCRL5	-0.22241	0.04935	7.66e-06	0.0966003	0.0608	0.1123
order.Bacteroidales.id.913	TS	rs73975615	17	6461200	G	A	PITPNM3	-0.20702	0.04426	1.21e-06	0.0239997	0.1355	0.8593
order.Bacteroidales.id.913	TS	rs7631304	3	89339527	G	A	EPHA3	-0.06489	0.01326	6.83e-07	0.0560996	0.0327	0.08665
order.Bacteroidales.id.913	TS	rs9648077	7	43057882	T	C	AC005537.2	-0.04748	0.0107	9.62e-06	0.0339955	0.027	0.209
order.Bacteroidales.id.913	TS	rs9812599	3	64340637	C	A	PRICKLE2	-0.06357	0.01426	8.35e-06	0.0379002	0.0352	0.2821
Legend
Column	Description
Chr	Chromosome of SNP
SNP	SNP rsID
A1	Effect allele
A0	Other allele
Closest gene	the closest gene to which the SNP mapped
Beta	Estimate coefficient
SE	Standard error of coefficient estimate
P-value	P-value from GWAS summary data of the gut microbiome
ADHD	Attention deficit/hyperactivity disorder
ASD	Autism spectrum disorder
BD	Bipolar disorder
NEU	Neuroticism
OCD	Obsessive-compulsive disorder
SA	Suicide attempts
SCZ	Schizophrenia
TS	Tourette syndrome
Physical position is based on the human genome GRCH37 assembly

## Sheet: Supplemental Table 5
Supplemental Table 5. Causal estimations of gut microbiota on psychiatric disorders identifiedin in complemental MR methods
Bacterial taxa (exposure)	Psychiatric disorder/trait (outcome)	No. SNP	R2	F	IVW		Maximum likelihood		MR-Egger		Weighted median		MR-PRESSO
					Beta	P-value	Beta	P-value	Beta	P-value	Beta	P-value	Beta	P-value
Species Eubacterium hallii	ADHD	13	0.0242	35.25	0.21	0.00397	0.22	0.00178	0.04	0.81	0.22	0.02	0.21	0.01
Order Gastranaerophilales	SCZ	11	0.0337	58.51	0.1	0.00798	0.1	0.00798	0.1	0.41	0.1	0.02	0.1	0.00102
Family Christensenellaceae	OCD	10	0.0257	48.7	-0.33	0.08	-0.32	0.09	-0.52	0.2	-0.4	0.11	-0.33	0.00094
Genus ChristensenellaceaeR-7	Extroversion	11	0.0143	24.32	-0.11	0.0029	-0.11	0.00337	-0.17	0.19	-0.1	0.03	-0.11	0.000188
Genus Ruminococcaceae UCG-010	NEU	8	0.0139	31.99	-0.04	0.00129	-0.04	0.00174	-0.05	0.36	-0.05	0.0068	-0.04	0.00011
Species Ruminococcus torques		11	0.0238	41	-0.04	0.00548	-0.04	0.00146	-0.02	0.59	-0.04	0.04	-0.04	0.02
Class Methanobacteria	SA	8	0.048	116.36	-0.16	0.01	-0.17	0.01	-0.3	0.28	-0.17	0.03	-0.16	0.00129
Order Methanobacteriales		8	0.048	116.36	-0.16	0.01	-0.17	0.01	-0.3	0.28	-0.17	0.03	-0.16	0.00129
Family Methanobacteriaceae		8	0.048	116.36	-0.16	0.01	-0.17	0.01	-0.3	0.28	-0.17	0.03	-0.16	0.00129
Genus Sellimonas		11	0.0594	105.99	-0.12	0.02	-0.12	0.02	-0.28	0.25	-0.12	0.07	-0.12	8.92e-05
Legend
Column	Description
No.SNP	Number of SNPs
ADHD	Attention deficit/hyperactivity disorder
SCZ	Schizophrenia
OCD	Obsessive-compulsive disorder
NEU	Neuroticism
SA	Suicide attempts

## Sheet: Supplemental Table 6
Supplemental Table 6. Causal estiamte from psychiatric exposure to identified bacterial outcomes in the reverse MR analysis
Psychiatric disorder/trait (exposure)	Bacterial taxa (outcome)	No. SNP	IVW		Maximum likelihood		MR-Egger		Weighted median		MR-PRESSO
			Beta	P-value	Beta	P-value	Beta	P-value	Beta	P-value	Beta	P-value
ADHD	Species Eubacterium hallii	108	0.00966612	0.572181	0.00992255	0.547354	-0.0258289	0.744678	0.00429776	0.853473	0.00966612	0.573364
ASD	Family Prevotellaceae	58	-0.0311683	0.194489	-0.0310658	0.197298	0.137124	0.238021	-0.00889523	0.800487	-0.0311683	0.199715
BD	Class Betaproteobacteria	177	0.0253795	0.0328773	0.025714	0.0342311	0.116407	0.0446393	0.0200257	0.261933	0.0253795	0.030474
SCZ	Class Actinobacteria	627	0.00443569	0.572746	0.00450629	0.567654	0.0571268	0.0287495	0.0117767	0.319457	0.00443569	0.572948
	Order Gastranaerophilales	622	0.0122009	0.366186	0.0123862	0.346115	0.11588	0.00982607	0.010513	0.583323	0.0122009	0.366536
OCD	Family Christensenellaceae	21	-0.0041964	0.792217	-0.00444035	0.749825	-0.0682965	0.177443	0.00745293	0.700709	-0.0041964	0.794912
TS	Class Bacteroidia	19	-0.0122881	0.532497	-0.0125803	0.528268	-0.148135	0.0878975	-0.0232241	0.376761	-0.0122881	0.436512
	Order Bacteroidales	19	-0.0122881	0.532497	-0.0125803	0.528268	-0.148135	0.0878975	-0.0232241	0.376761	-0.0122881	0.436512
Extroversion	Phylum Actinobacteria	682	-0.0422149	0.244519	-0.0433953	0.216284	-0.27737	0.0803237	-0.0422149	0.244927	-0.0506196	0.342982
	Class Actinobacteria	682	-0.0351432	0.37022	-0.0364323	0.323401	-0.0231772	0.892561	-0.104954	0.0605131	-0.0351432	0.370537
	Genus Christensenellaceae R-7	682	-0.0162166	0.652737	-0.0161786	0.659425	0.00448335	0.977272	0.0530989	0.31629	-0.0162166	0.648844
NEU	Genus Ruminococcaceae UCG-010	679	-0.0937347	0.0207438	-0.0956408	0.0204883	-0.0964647	0.585751	-0.0746022	0.204205	-0.0937347	0.0185461
	Species Clostridium innocuum	661	-0.204143	0.00425377	-0.203827	0.00492037	-0.789519	0.0130116	-0.155286	0.136855	-0.204143	0.00438797
	Species Ruminococcus torques	682	0.0407768	0.23826	0.0409009	0.245309	-0.0013899	0.992659	0.0645285	0.216715	0.0407768	0.226093
SA	Class Methanobacteria	17	0.0981534	0.110871	0.101856	0.104235	0.0189307	0.945948	0.097176	0.263053	0.0981534	0.0652842
	Order Methanobacteriales	17	0.0981534	0.110871	0.101856	0.104235	0.0189307	0.945948	0.097176	0.236329	0.0981534	0.0652842
	Family Methanobacteriaceae	17	0.0981534	0.110871	0.101856	0.104235	0.0189307	0.945948	0.097176	0.235116	0.0981534	0.0652842
	Genus Sellimonas	15	0.0264019	0.702306	0.0271672	0.698282	0.186781	0.624143	0.0232701	0.79817	0.0264019	0.652312
Legend
Column	Description
No.SNP	Number of SNPs
Beta	Estimated causal effect coefficient in different MR methods
P-value	P-value of causal estimation in different MR methods
ADHD	Attention deficit/hyperactivity disorder
ASD	Autism spectrum disorder
BD	Bipolar disorder
NEU	Neuroticism
OCD	Obsessive-compulsive disorder
SA	Suicide attempts
SCZ	SCZ
TS	Tourette syndrome
The reverse MR analysis showed no significantly causal result at multiple-testing threshold (P=2.78×10-3(0.05/18))

## Sheet: Supplemental Table 7
Supplemental Table 7. The association of SNPs and traits of chronic bowel or intestine disease
Bacterial taxa (exposure)	Psychiatric disorder/trait (outcome)	SNP	Irritable bowel syndrome	Inflammatory bowel disease	Ulcerative colitis	Crohn's disease	Bowel problem	Other non-infective gastroenteritis and colitis	Other functional intestinal disorders
family.Prevotellaceae.id.960	ASD	rs12057990	0.51581	0.59019	0.40977	0.012174	0.87505	0.0094843	0.054374
family.Prevotellaceae.id.960	ASD	rs12118202	0.62869	0.74719	0.32732	0.59107	0.93954	0.1473	0.47462
family.Prevotellaceae.id.960	ASD	rs13069367	0.56379	0.43403	0.42296	0.50076	0.88624	0.031125	0.0038399
family.Prevotellaceae.id.960	ASD	rs148376875	0.089017	0.73831	0.78954	0.57687	0.56397	0.99423	0.56787
family.Prevotellaceae.id.960	ASD	rs2206482	0.85202	0.0081598	0.70875	0.16067	0.032066	0.25879	0.22691
family.Prevotellaceae.id.960	ASD	rs3758087	0.9716	0.43057	0.69965	0.9326	0.97924	0.072467	0.48121
family.Prevotellaceae.id.960	ASD	rs3860225	0.7965	0.75568	0.54554	0.93672	0.48236	0.53572	0.99493
family.Prevotellaceae.id.960	ASD	rs4493272	0.85348	0.3232	0.51969	0.28149	0.1863	0.0042525	0.40045
family.Prevotellaceae.id.960	ASD	rs4685827	0.79527	0.0032652	0.4798	0.61096	0.075989	0.05848	0.51285
family.Prevotellaceae.id.960	ASD	rs7252711	0.5253	0.63243	0.58279	0.9211	0.013287	0.54066	0.7532
family.Prevotellaceae.id.960	ASD	rs912860	0.016793	0.00072346	0.85764	0.023185	0.08689	0.27714	0.51517
family.Prevotellaceae.id.960	ASD	rs9586501	0.24045	0.093264	0.83698	0.68228	0.26986	0.23067	0.23067
family.Prevotellaceae.id.960	ASD	rs9958960	0.46422	0.1125	0.15219	0.13969	0.62806	0.46774	0.43039
class.Betaproteobacteria.id.2867	BD	rs11128180	0.53644	0.78429	0.81972	0.44731	0.66308	0.66507	0.054105
class.Betaproteobacteria.id.2867	BD	rs1511453	0.59615	0.18733	0.68183	0.5487	0.35451	0.66446	0.70616
class.Betaproteobacteria.id.2867	BD	rs17419034	0.81647	0.53443	0.2501	0.44432	0.80477	0.087143	0.79396
class.Betaproteobacteria.id.2867	BD	rs1928341	0.42362	0.064489	0.92663	0.69323	0.00058501	0.93321	0.86503
class.Betaproteobacteria.id.2867	BD	rs2321387	0.1667	0.777	0.87719	0.91544	0.12898	0.8605	0.45554
class.Betaproteobacteria.id.2867	BD	rs2613606	0.9006	0.41644	0.93606	0.64177	0.2428	0.55976	0.48481
class.Betaproteobacteria.id.2867	BD	rs320161	0.072121	0.93317	0.48508	0.36675	0.49951	0.31937	0.29028
class.Betaproteobacteria.id.2867	BD	rs4033856	0.93219	0.85514	0.018507	0.098806	0.23788	0.79513	0.49811
class.Betaproteobacteria.id.2867	BD	rs56104821	0.36985	0.59963	0.047935	0.97725	0.060799	0.043179	0.0039661
class.Betaproteobacteria.id.2867	BD	rs56386628	0.99724	0.67625	0.25001	0.78691	0.025479	0.7594	0.97047
class.Betaproteobacteria.id.2867	BD	rs6087811	0.76555	0.31168	0.48853	0.99274	0.58399	0.60606	0.3099
class.Betaproteobacteria.id.2867	BD	rs62191117	0.67383	0.006192	0.53915	0.95166	0.86587	0.98924	0.34079
class.Betaproteobacteria.id.2867	BD	rs62395635	0.9154	0.67292	0.58379	0.68321	0.63608	0.096107	0.29325
class.Betaproteobacteria.id.2867	BD	rs6787389	0.96928	0.96384	0.69994	0.66187	0.95586	0.030888	0.40856
class.Betaproteobacteria.id.2867	BD	rs7253477	0.6321	0.14167	0.97378	0.27193	0.090777	0.75181	0.86049
class.Betaproteobacteria.id.2867	BD	rs9964679	0.33578	0.54362	0.34836	0.75874	0.93027	0.36068	0.91761
class.Actinobacteria.id.419	Extroversion	rs10209482	0.86228	0.0031004	0.34509	0.45728	0.23299	0.96179	0.37234
class.Actinobacteria.id.419	Extroversion	rs112084119	0.5086	0.5086	0.71478	0.95813	0.26638	0.78532	0.87858
class.Actinobacteria.id.419	Extroversion	rs11655079	0.64551	0.64453	0.97233	0.53808	0.62794	0.82115	0.63387
class.Actinobacteria.id.419	Extroversion	rs11745923	0.98235	0.84575	0.62142	0.5672	0.45807	0.694	0.8208
class.Actinobacteria.id.419	Extroversion	rs12049045	0.48456	0.64135	0.37111	0.45327	0.72616	0.58529	0.62044
class.Actinobacteria.id.419	Extroversion	rs134366	0.11087	0.28415	0.50075	0.74872	0.81933	0.24282	0.839
class.Actinobacteria.id.419	Extroversion	rs1376754	0.83046	0.079086	0.80593	0.50635	0.6988	0.72219	0.030277
class.Actinobacteria.id.419	Extroversion	rs1515761	0.84186	0.95835	0.30634	0.63128	0.42381	0.644	0.30916
class.Actinobacteria.id.419	Extroversion	rs17261772	0.68157	0.22683	0.21789	0.73043	0.75221	0.84129	0.26855
class.Actinobacteria.id.419	Extroversion	rs1961273	0.047567	0.93611	0.51281	0.79346	0.29274	0.32661	0.16959
class.Actinobacteria.id.419	Extroversion	rs1983357	0.81554	0.4275	0.636	0.38687	0.61135	0.82845	0.47409
class.Actinobacteria.id.419	Extroversion	rs319899	0.33149	0.58731	0.4157	0.17879	0.69399	0.024187	0.96429
class.Actinobacteria.id.419	Extroversion	rs358060	0.93992	0.96194	0.00029603	0.11366	0.52539	0.50198	0.085676
class.Actinobacteria.id.419	Extroversion	rs3820794	0.9329	0.52059	0.41149	0.64884	0.75112	0.75821	0.29618
class.Actinobacteria.id.419	Extroversion	rs4954556	0.82463	0.28577	0.43976	0.88651	0.10869	0.61816	0.82279
class.Actinobacteria.id.419	Extroversion	rs60317558	0.96548	0.88977	0.74418	0.050922	0.94558	0.35527	0.87343
class.Actinobacteria.id.419	Extroversion	rs6430601	0.37539	0.31171	0.49441	0.32391	0.70403	0.5739	0.60516
class.Actinobacteria.id.419	Extroversion	rs6660520	0.72009	0.0012316	0.38638	0.16303	0.4751	0.026105	0.48904
class.Actinobacteria.id.419	Extroversion	rs6716536	0.40128	0.19368	0.87304	0.52621	0.94392	0.47915	0.2017
class.Actinobacteria.id.419	Extroversion	rs6723108	0.29851	0.17944	0.22082	0.96842	0.21451	0.92373	0.04925
class.Actinobacteria.id.419	Extroversion	rs7003528	0.82204	0.089603	0.16697	0.20047	0.94742	0.46888	0.85153
class.Actinobacteria.id.419	Extroversion	rs72767435	0.85201	0.96433	0.51953	0.30744	0.39694	0.87629	0.19072
class.Actinobacteria.id.419	Extroversion	rs72847650	0.74789	0.2745	0.19891	0.14074	0.26632	0.37783	0.38244
class.Actinobacteria.id.419	Extroversion	rs7322849	-	-	-	-	-	-	-
class.Actinobacteria.id.419	Extroversion	rs7732645	0.95293	0.56513	0.46566	0.33989	0.62202	0.868	0.0502
class.Actinobacteria.id.419	Extroversion	rs80083040	0.56039	0.54146	0.51868	0.19459	0.20633	0.99447	0.61633
class.Actinobacteria.id.419	Extroversion	rs8047955	0.8359	0.17151	0.50101	0.45566	0.42722	0.11802	0.12227
class.Actinobacteria.id.419	Extroversion	rs961091	0.76913	0.26823	0.14395	0.70601	0.59027	0.7112	0.67829
phylum.Actinobacteria.id.400	Extroversion	rs10209482	0.86228	0.0031004	0.34509	0.45728	0.23299	0.96179	0.37234
phylum.Actinobacteria.id.400	Extroversion	rs10513350	0.1978	0.82544	0.8808	0.88667	0.098323	0.25936	0.83202
phylum.Actinobacteria.id.400	Extroversion	rs12528285	0.0017056	0.94971	0.17149	0.6512	0.51069	0.15384	0.30834
phylum.Actinobacteria.id.400	Extroversion	rs13192624	0.49974	0.40835	0.59266	0.71669	0.84541	0.45623	0.6616
phylum.Actinobacteria.id.400	Extroversion	rs1397793	0.47426	0.5017	0.017174	0.30205	0.65237	0.32719	0.063955
phylum.Actinobacteria.id.400	Extroversion	rs1441337	0.63386	0.63689	0.49051	0.19328	0.34184	0.75436	0.67375
phylum.Actinobacteria.id.400	Extroversion	rs17261772	0.68157	0.22683	0.21789	0.73043	0.75221	0.84129	0.26855
phylum.Actinobacteria.id.400	Extroversion	rs1879087	0.65614	0.60672	0.29695	0.54778	0.032125	0.97852	0.93038
phylum.Actinobacteria.id.400	Extroversion	rs3820794	0.9329	0.52059	0.41149	0.64884	0.75112	0.75821	0.29618
phylum.Actinobacteria.id.400	Extroversion	rs4429415	0.59885	0.78987	0.96147	0.53942	0.74018	0.45048	0.22121
phylum.Actinobacteria.id.400	Extroversion	rs55888705	0.19937	0.36953	0.34333	0.18839	0.50211	0.025322	0.82401
phylum.Actinobacteria.id.400	Extroversion	rs62448871	0.27076	0.81354	0.55718	0.65113	0.48421	0.99771	0.86529
phylum.Actinobacteria.id.400	Extroversion	rs6430601	0.37539	0.31171	0.49441	0.32391	0.70403	0.5739	0.60516
phylum.Actinobacteria.id.400	Extroversion	rs6496870	0.18178	0.80937	0.044119	0.93335	0.95988	0.22794	0.4347
phylum.Actinobacteria.id.400	Extroversion	rs6716536	0.40128	0.19368	0.87304	0.52621	0.94392	0.47915	0.2017
phylum.Actinobacteria.id.400	Extroversion	rs6723108	0.29851	0.17944	0.22082	0.96842	0.21451	0.92373	0.04925
phylum.Actinobacteria.id.400	Extroversion	rs74037001	0.85738	0.094678	0.90502	0.87224	0.60448	0.69544	0.3381
phylum.Actinobacteria.id.400	Extroversion	rs75211493	0.38742	0.62066	0.90304	0.62957	0.79479	0.78945	0.18386
phylum.Actinobacteria.id.400	Extroversion	rs76355910	0.386	0.61184	0.58468	0.46674	0.94343	0.40206	0.912
phylum.Actinobacteria.id.400	Extroversion	rs80124826	0.34946	0.46271	0.17028	0.50154	0.75434	0.12134	0.69584
phylum.Actinobacteria.id.400	Extroversion	rs8047955	0.8359	0.17151	0.50101	0.45566	0.42722	0.11802	0.12227
phylum.Actinobacteria.id.400	Extroversion	rs857444	0.13683	0.19187	0.44938	0.17087	0.56142	0.75301	0.43928
phylum.Actinobacteria.id.400	Extroversion	rs9833771	0.56555	0.5244	0.13145	0.33335	0.92832	0.42686	0.058575
species.Clostridiuminnocuumgroup.id.14397	NEU	rs10074000	0.84106	0.34942	0.89462	0.45492	0.84072	0.8942	0.68522
species.Clostridiuminnocuumgroup.id.14397	NEU	rs11792329	0.81113	0.82106	0.19371	0.80071	0.052642	0.85868	0.044415
species.Clostridiuminnocuumgroup.id.14397	NEU	rs6890185	0.34105	0.54541	0.91425	0.98592	0.73445	0.92724	0.15938
species.Clostridiuminnocuumgroup.id.14397	NEU	rs72864816	0.52109	0.35086	0.098405	0.93883	0.8433	0.20126	0.50098
species.Clostridiuminnocuumgroup.id.14397	NEU	rs73126515	0.44444	0.74366	0.36196	0.21959	0.52291	0.91828	0.83831
class.Actinobacteria.id.419	SCZ	rs10209482	0.86228	0.0031004	0.34509	0.45728	0.23299	0.96179	0.37234
class.Actinobacteria.id.419	SCZ	rs112084119	0.5086	0.5086	0.71478	0.95813	0.26638	0.78532	0.87858
class.Actinobacteria.id.419	SCZ	rs11655079	0.64551	0.64453	0.97233	0.53808	0.62794	0.82115	0.63387
class.Actinobacteria.id.419	SCZ	rs11745923	0.98235	0.84575	0.62142	0.5672	0.45807	0.694	0.8208
class.Actinobacteria.id.419	SCZ	rs12049045	0.48456	0.64135	0.37111	0.45327	0.72616	0.58529	0.62044
class.Actinobacteria.id.419	SCZ	rs134366	0.11087	0.28415	0.50075	0.74872	0.81933	0.24282	0.839
class.Actinobacteria.id.419	SCZ	rs1376754	0.83046	0.079086	0.80593	0.50635	0.6988	0.72219	0.030277
class.Actinobacteria.id.419	SCZ	rs1515761	0.84186	0.95835	0.30634	0.63128	0.42381	0.644	0.30916
class.Actinobacteria.id.419	SCZ	rs17261772	0.68157	0.22683	0.21789	0.73043	0.75221	0.84129	0.26855
class.Actinobacteria.id.419	SCZ	rs1961273	0.047567	0.93611	0.51281	0.79346	0.29274	0.32661	0.16959
class.Actinobacteria.id.419	SCZ	rs1983357	0.81554	0.4275	0.636	0.38687	0.61135	0.82845	0.47409
class.Actinobacteria.id.419	SCZ	rs319899	0.33149	0.58731	0.4157	0.17879	0.69399	0.024187	0.96429
class.Actinobacteria.id.419	SCZ	rs358060	0.93992	0.96194	0.00029603	0.11366	0.52539	0.50198	0.085676
class.Actinobacteria.id.419	SCZ	rs3820794	0.9329	0.52059	0.41149	0.64884	0.75112	0.75821	0.29618
class.Actinobacteria.id.419	SCZ	rs4954556	0.82463	0.28577	0.43976	0.88651	0.10869	0.61816	0.82279
class.Actinobacteria.id.419	SCZ	rs60317558	0.96548	0.88977	0.74418	0.050922	0.94558	0.35527	0.87343
class.Actinobacteria.id.419	SCZ	rs6430601	0.37539	0.31171	0.49441	0.32391	0.70403	0.5739	0.60516
class.Actinobacteria.id.419	SCZ	rs6660520	0.72009	0.0012316	0.38638	0.16303	0.4751	0.026105	0.48904
class.Actinobacteria.id.419	SCZ	rs6716536	0.40128	0.19368	0.87304	0.52621	0.94392	0.47915	0.2017
class.Actinobacteria.id.419	SCZ	rs6723108	0.29851	0.17944	0.22082	0.96842	0.21451	0.92373	0.04925
class.Actinobacteria.id.419	SCZ	rs7003528	0.82204	0.089603	0.16697	0.20047	0.94742	0.46888	0.85153
class.Actinobacteria.id.419	SCZ	rs72767435	0.85201	0.96433	0.51953	0.30744	0.39694	0.87629	0.19072
class.Actinobacteria.id.419	SCZ	rs72847650	0.74789	0.2745	0.19891	0.14074	0.26632	0.37783	0.38244
class.Actinobacteria.id.419	SCZ	rs7322849	-	-	-	-	-	-	-
class.Actinobacteria.id.419	SCZ	rs7732645	0.95293	0.56513	0.46566	0.33989	0.62202	0.868	0.0502
class.Actinobacteria.id.419	SCZ	rs80083040	0.56039	0.54146	0.51868	0.19459	0.20633	0.99447	0.61633
class.Actinobacteria.id.419	SCZ	rs8047955	0.8359	0.17151	0.50101	0.45566	0.42722	0.11802	0.12227
class.Actinobacteria.id.419	SCZ	rs961091	0.76913	0.26823	0.14395	0.70601	0.59027	0.7112	0.67829
class.Bacteroidia.id.912	TS	rs1014718	0.49463	0.12998	0.92227	0.15151	0.8965	0.60439	0.43659
class.Bacteroidia.id.912	TS	rs10451505	0.15836	0.73887	0.38136	0.086452	0.46411	0.19132	0.29879
class.Bacteroidia.id.912	TS	rs13291434	0.60195	0.90286	0.12368	0.9433	0.2612	0.087937	0.37032
class.Bacteroidia.id.912	TS	rs2032750	0.68778	0.77268	0.7825	0.97726	0.11588	0.85993	0.66394
class.Bacteroidia.id.912	TS	rs55773148	0.11317	0.9589	0.34234	0.14774	0.35767	0.65956	0.84127
class.Bacteroidia.id.912	TS	rs62531359	0.68719	0.77706	0.77129	0.66067	0.69111	0.68229	0.7327
class.Bacteroidia.id.912	TS	rs72706335	0.85201	0.96433	0.51953	0.30744	0.39694	0.87629	0.19072
class.Bacteroidia.id.912	TS	rs73975615	0.86989	0.15418	0.014503	0.62569	0.50214	0.18986	0.8059
class.Bacteroidia.id.912	TS	rs7631304	0.058291	0.25451	0.47825	0.6886	0.34034	0.040135	0.20244
class.Bacteroidia.id.912	TS	rs9648077	0.82968	0.21077	0.9751	0.87807	0.4045	0.14906	0.1505
class.Bacteroidia.id.912	TS	rs9812599	0.68812	0.57315	0.22697	0.9641	0.074596	0.54429	0.12382
order.Bacteroidales.id.913	TS	rs1014718	0.49463	0.12998	0.92227	0.15151	0.8965	0.60439	0.43659
order.Bacteroidales.id.913	TS	rs10451505	0.15836	0.73887	0.38136	0.086452	0.46411	0.19132	0.29879
order.Bacteroidales.id.913	TS	rs13291434	0.60195	0.90286	0.12368	0.9433	0.2612	0.087937	0.37032
order.Bacteroidales.id.913	TS	rs2032750	0.68778	0.77268	0.7825	0.97726	0.11588	0.85993	0.66394
order.Bacteroidales.id.913	TS	rs55773148	0.11317	0.9589	0.34234	0.14774	0.35767	0.65956	0.84127
order.Bacteroidales.id.913	TS	rs62531359	0.68719	0.77706	0.77129	0.66067	0.69111	0.68229	0.7327
order.Bacteroidales.id.913	TS	rs72706335	0.85201	0.96433	0.51953	0.30744	0.39694	0.87629	0.19072
order.Bacteroidales.id.913	TS	rs73975615	0.86989	0.15418	0.014503	0.62569	0.50214	0.18986	0.8059
order.Bacteroidales.id.913	TS	rs7631304	0.058291	0.25451	0.47825	0.6886	0.34034	0.040135	0.20244
order.Bacteroidales.id.913	TS	rs9648077	0.82968	0.21077	0.9751	0.87807	0.4045	0.14906	0.1505
order.Bacteroidales.id.913	TS	rs9812599	0.68812	0.57315	0.22697	0.9641	0.074596	0.54429	0.12382
Legend
Column	Description
ADHD	Attention deficit/hyperactivity disorder
ASD	Autism spectrum disorder
BD	Bipolar disorder
NEU	Neuroticism
OCD	Obsessive-compulsive disorder
SA	Suicide attempts
SCZ	Schizophrenia
TS	Tourette syndrome
Note: The associations are not significant after the multiple correction (Family Prevotellaceae P<0.05/(13×7)=5.94×10-4, Class Betaproteobacteria P<0.05/(16×7)=4.46×10-4, Class Actinobacteria P<0.05/(28×7)=2.55×10-4, Class Bacteroidia P<0.05/(11×7)=6.94×10-4, Order Bacteroidales P<0.05/(11×7)=6.94×10-4, Phylum Actinobacteria P<0.05/(23×7)=3.11×10-4, Species Clostridium innocuum P<0.05/(5×7)=1.43×…
